# Supplementary material for: Xa1 Allelic R Genes Activate Rice Blight Resistance Suppressed by Interfering TAL Effectors
Source: PubMed Central journal article supplement — Plant Commun. 2020 Jun 20;1(4):100087. doi: 10.1016/j.xplc.2020.100087 (PMC7748017; doi:10.1016/j.xplc.2020.100087), 2020-06-20
Supplement: mmc1.pdf [file mmc1.pdf]

**Plant Communications, Volume 1**

**Supplemental Information**

***Xa1* Allelic *R* Genes Activate Rice Blight Resistance Suppressed by Interfering TAL Effectors**

**Chonghui Ji, Zhiyuan Ji, Bo Liu, He Cheng, Hua Liu, Sanzhen Liu, Bing Yang, and Gongyou Chen**

## SUPPLEMENTAL INFORMATION

### ***Xa1* allelic *R* genes activate rice blight resistance suppressed by interfering TAL effectors**

Chonghui Ji<sup>1,6</sup>, Zhiyuan Ji<sup>2,3,6</sup>, Bo Liu<sup>1</sup>, He Cheng<sup>4</sup>, Hua Liu<sup>1</sup>, Sanzhen Liu<sup>4</sup>, Bing Yang<sup>1,5,\*</sup> and Gongyou Chen<sup>2,\*</sup>

<sup>1</sup>Division of Plant Sciences, C. Bond Life Science Center, University of Missouri, Columbia, MO 65211, USA

<sup>2</sup>School of Agriculture and Biology/State Key Laboratory of Microbial Metabolism, Shanghai Jiao Tong University, Shanghai 200240, P.R. China.

<sup>3</sup>National Key facility for Crop Gene Resources and Genetic Improvement (NFCRI), Institute of Crop Sciences, Chinese Academy of Agricultural Sciences, Beijing 100081, P.R. China

<sup>4</sup>Department of Plant Pathology, Kansas State University, Manhattan, KS 66506, USA

<sup>5</sup>Donald Danforth Plant Science Center, St. Louis, MO 63132, USA

<sup>6</sup>These authors contributed equally to this article.

**\*Correspondence: Bing Yang (yangbi@missouri.edu), Gongyou Chen (gyouchen@sjtu.edu.cn)**

#### **Contain:**

Supplemental Figure 1

Supplemental Table 1 to 5.

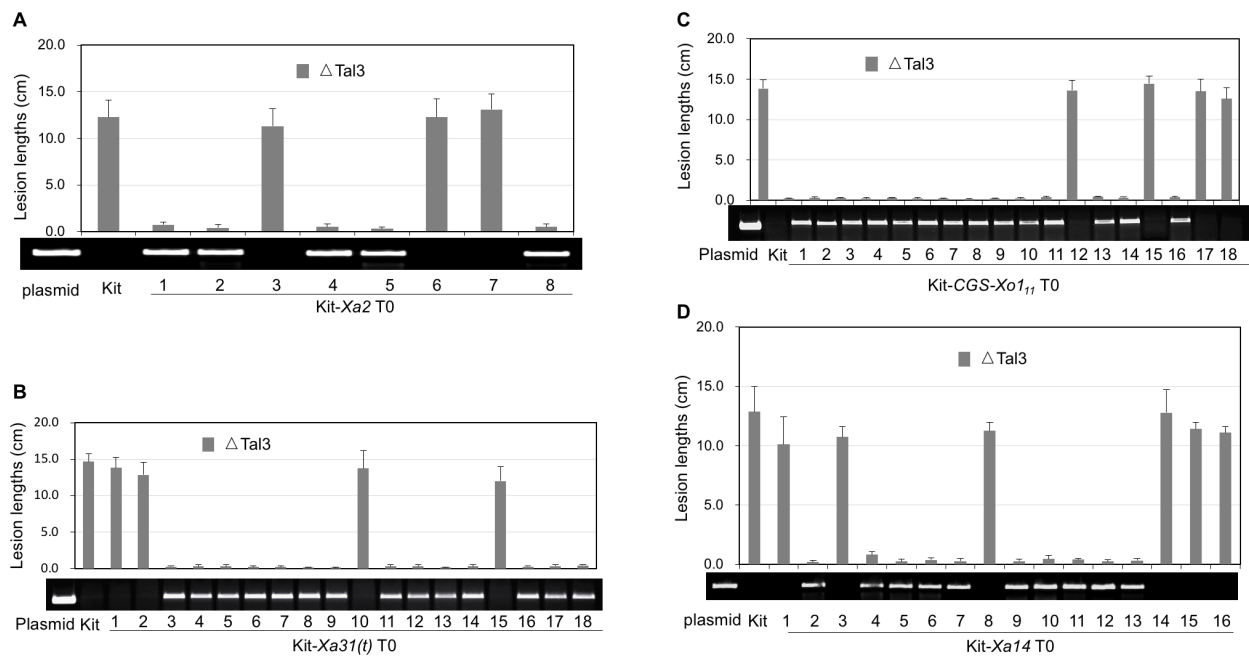

**Supplemental Figure 1. Association of genotypes and phenotypes of the *Xa2*, *Xa31(t)*, *CGS-Xo11* and *Xa14* transgenic Kitaake plants in T0 generation.** Lesion lengths (centimeter) derived from inoculation of  $\Delta$ Tal3 are presented above the gel images of PCR-amplicons from individual plants with gene specific primers.

**Supplemental Figure 2 Nucleotide sequences of and predicted amino acid sequences encoded by *Xa2*, *Xa14*, *Xa31(t)*, *CGS-Xo11* and *Xa45(t)*.** The genomic fragments cloned into pCAMBIA1300 were Sanger sequenced. The promoter sequences are in green lower letters. The sequence for start and stop codons are red and shaded in yellow; between them are introns in blue lower letters shaded in grey, the sequences encoding for 93 amino acids repeats are alternating red and blue upper letters. The terminator sequences are in black lower letters. The predicted amino acids sequences follow the DNA sequences of individual genes.

>*Xa2*

```

ttcaggaagacgggactgaatacatatcttcttaattccaaagcattcaggatgtttatgaaagataattactgttg
tttttaggaaacatattacatcggcgcttgtcaggtaagctgacatagagtgatgattcatggtttcaaagtgaa
tatatatattcctcgcgatggacaactttactatgctttgtcaaggagatgtaaggcaaacagtaacagggattttt
gccaaactaccaaactaggaagagatagacctaccgaaaatattatgtataaagggttcttggaatattagaaaa
atataatgacaccgtagcgttagcacgggcatattactagtagaaciaaaagaaacacttatgcatttatacccaaaa
aaaaaacgtaattaatggaccgcatttctgactgtgtageggcccgtcgaagcataaactcaaaacttttaagccagag
atgggcctgggccaacatcgacataaactggaataagtcacttgccttccctcaactttacatggagtggtgatga
tggccctaattcccaataccagatgtcgaccctcaagtcttcaaaacctgcaaagtagttcctcgaggggataga
ccatatttcccctgggtttccattgatgtggcatatatacagggcccactacctgaaccatcgccacgtccagtccttt
cggcctgttcgcatgacgagctcggccaccacctcaacatcgtccatgctgcccgcgatggcgaggagacagctggg
acggtgaacctcatagctccgtctgttgcaacatcctctcgccattctcacgcccacacgacaccttgtcctcctg
ctccgtagcagcctcgcaagctcacgcccggcctcatcgaggtcccctgtccccgagccgcttctagcatcgatga
gctgaggagctccccactgcccaggcgatgacgatttggcagggagggtcgcattcgcccactccaattcgagcgcg
tcacacctccccctccccctcctattcatccaccaccaacgcggataggagaagggatagaggaaagtgtgctgga
cacttacatattggttccatataatcttcttactcggatgccacgtcagataaaaacaaccgtcgggtcaacatttttc
gtagtggggattagggagctcatacatgactcgacgcagagctgagggatggcaagtgaacttattcccataaactt
ccaaaagtgtggaatgctcaacttgggcttctctcggatgctgaagtgctaattgggccaataaaccaactagccca
cagcccatcgaagtggaagccgacgagtcacccgtcaacgcggcagtagtaatccgagaaaaacgcgggtcgcgcgaa
gcaatcgtatcatcatcagacgattaatccacgcgaccaggagcgtgccccgagccacacgcgccacgcactgggt
gaatcttctctcttccacctagttttctcactctcagctctcctcctactactctctgcttaccatcctcgctt
gttgagccctcttgacacgccttggccacagtcceaaggactgctcctgttccgATGAGGAGGTGGAAGCCGGT
TGGCTGGAGGGCGGGATCAGGTGGCTGGCGGAGACCATCCTGGATAACCTGGACGCCGACAAGCTGGATGAATGGAT
TCGCCAGATTAGGCTCGCCGCTGACACCGAGAAGCTACGGGCTGAGATCGAGAAGGTGGATGGGGTGGTGGCTGCCG
TGAAGGGGAGGGCGATCGGGAACAGGTGCTGGCCCGATCGCTCGGCCGTCTCAGGGGGTTGCTGTACGACGCCGAC
GATGCGGTGACGAGCTCGACTACTTCAGGCTCCAGCAGCAGGTGAGGGAGGAGgtactgtcctttgcatatataccg
tgcttttaattaagtgtgcaagctgcgttgcctgcaacaatgggtgtattggcgtcagtttccaatccatgcttgtg
ctacagTTACTACACGGTTTGGAGCTGAAGAGACGGTCCGAGATGGAGCAGAGGACGAGGACGATATTCGATGGAC
AATACTGATGTACCGGAGGCAGTGGCGGCAGGCAGCAGCAAGAAACGGTCCAAGGCATGGGAACACTTTACTACCGT
AGAGTTCAGTCTGACGGGAAGGATTCTAAAGCACGGTGAAGTACTGCCACAAGGACCTATGTTGCACATCTAAGA
ACGGGACATCAGCTTTGCGCAACCATCTCAATGTTTGAAGAGGAAACGTGTAACAAGTACTGACCAACCGGTAAAT
CCATCAAGgtaatgctaattggagttctgaatcttagtgtaaatccggttgaagtgtaaatttggcccgttacatctgct
caagatctcattctgtctctaattcttctaataagccaactcatggtcatttttttctctaataatataagtagccggtgat
ggtgcaccaaagtgaattagatgcaaggaacaaaagtgaacaattgtatatacaaatataattatatactaaaaca
tgagtgtgtatcaaatccaattctttcaaaaatctactatgcaaaaattgagtgacaaaatctgctgcctttttttt
tttacagaaagcaaccaattaatataagtcaaatataaaaacgctttgtagtctccaataaaaatagctcattgtttc
gtttatacttatgtttataaatttaaatlttaaaacttaattttggagttgattttgtggtttcttttctcctatt
ttatlttaacaactttgattttgaatagtttaagaatcgctatataaaaaattttaccataagttatttttaaatgt
ttaataaactcgaaggaataatcaagataagtgaaacgattcgcctctcatctacttaagatttgcgttataattgc
tgacctttctaatacgcctaaccacgatcacatgctcttccagTGCCGGTGAGGGTGCATCAAATGCAACTGGTAATT
CAGTTGGCAGAAAAGGATGAGAATGGATGGGACTTCAACACACCACGAGGCAGTTAGCACGCACCCTTGGAAACAAG
GCTGAACTTTCCAACAGGATCCAATGCATGACTCATCAGTTAGAAGAGGCTGTAAATGAGGTTATGAGGCTATGTCTG
ATCCTCAAGTTCAAACCAGAGTCGACAGGGTACACCACCGCCACAAATGCAACAACATCGTCTTATCTTCCGGAGC
CCATAGTGTATGGGAGGGCTGCAGAGATGGAAACCATCAAACAGCTGATCATGAGCAATAGATCTAATGGCATAACC
GTCCTGCCAATTGTAGGCAATGGAGGGATAGGAAAAACCACTTTGGCGCAACTGGTCTGCAAAGATCTGGTAATTAA
AAGTCAGTTTAAATGTTAAGATATGGGTGTATGTATCTGATAAATTTGATGTAGTTAAGATTACAAGGCAGATTTTGG
ATCATGTCTCCAACCAGAGCCACGAAGGAATAAGCAACCTTGATACGCTTCAGCAGGATCTTGAGGAACAAATGAAA

```

TCTAAGAAGTTCCCTCATTGTCTTAGATGATGTGTGGGAAATCCGTACAGATGACTGGAAAAACTACTGGCTCCTTT  
AAGACCTAATGATCAGGTGAATTCATCACAGGAAGAGGCAACAGGTAATATGATAATTTTACAACCTCGTATACAGA  
GTATTGCCAAAAGTCTTGGAACAGTACAATCAATTAAGTTAGAAGCTCTGAAAGATGACGATATATGGTCACTATTT  
AAAGTGCATGCTTTTGGTAATGATAAACATGATAGTAGTCCAGGCTTACAGGTTCTTGGGAAGCAAATGCTAGCGA  
GCTAAAAGGCAACCCACTGGCAGCAAAAACCTGTGGGTTCACTATTAGGAACGAATCTTACCATCGATCATTGGGATA  
GCATTATAAAGAGTGAAGAATGGAAATCCCTGCAACAAGCTTATGGCATCATGCAAGCGCTGAAGTTGAGCTATGAT  
CATCTATCCAACCCCTTACAGCAATGCGTCTCTTATTGTTCTCTTTTCCCAAGGGTTATTCTTTCAGCAAAGCACA  
ACTAATACAAATATGGATTGCTCAAGGATTTGTGGAAAGAATCCAGTGAGAAGTTGGAGCAGAAAGGATGGAAATATC  
TAGCTGAGTTGGTAAATTCGGGTTTCCCTCAGCAAGTTGAAAGCACACGGTTTTTCATCAGAATATTTTGTATGCAC  
GATCTTATGCATGATTTAGCGCAAAAAGGTTTACAAAACAGAATATGCAACTATAGATGGCTCAGAGTGCACAGAGTT  
AGCCCCAAGTATACGCCATTTGTCAATAGTAAGTACTGATTTGCATACCGCAAGGAGAAATATAGAAACATATCTCGTA  
ATGAGGTGTTTGGAAAAGGTTGATGAAAGTTAAGTCAAGGAGTAAGTTGAGGTCACTGGTATTAATTTGGCAATAT  
GATTCTCATTTTTTTAAATATTTCAAAGATGCTTTCAAGGAAGCACAACATCTGCGACTGCTGCAGATCACTGCAAC  
TTATGCTGATTCTGATTCAATTTCTCTCCAGTTTGGTAAATTTACACATCTCCGGTATCTGAAAATTTGTGACCGAAG  
AATCCGGCAGAACTTTGCCCGATCTCTAAGGAAGTATTACCATCTTCAAGTACTAGATATTGGCTATAGATTTGGA  
ATTCCCCGTATATCTAATGATATAAATAATCTTCTCAGCCTGCGGCATCTTGTTCATATGATGAAGTGTGTTCTTC  
CATTGCTAACATTGGTAAAATGACCTCACTTCAGGAAGTGGCAATTTTATTGTTTCAAGAAATTTAAGTGGTTTTG  
AGGTGACACAATTGAAATCCATGAACAAGCTTGTACAACCTTAGTGTGTCTCAGCTTGAAAATGTTAGAAGTCAAGGAG  
GAGGCATGTGGGGCAAAACTGAAAGACAAAACAACACTTAGAAAAGCTACATTTGTCCTGGAAGGATGCATGGAATGG  
ATATGACAGTGACGAAAGCTATGAAGATGAATACGGCAGTGATATGAATATAGAAACAGAAGGGGAGGAAGTGTGAG  
TTGGTGATGCCAATGGTGCCCAAAGCTTACAACATCACAGTAATATAAGCTCTGAACTTGCTTCAAGTGAAGTGTGCTC  
GAAGGTCTTGAACCACATCACGGCCTCAAGTATCTACGGATATCTGGGTATAATGGATCTACCTCCCAACTTGGCT  
TCCTTCTTCACTTACCTGTCTGCAACACTTTCATCTAGAAAATGTGGAAAATGGCAAATACTTCTTTAGAAAAGGC  
TAGGGTTACTTGTAAAGCTCGTGTGATCAAAATGAGGAATGCAACAGAAGTCTCAATCCCTTCACTGGAGGAGCTT  
GTGTTAATTGCATTGCCAAGCTTGAACACATGCTCCTGCACCTCCATCAGGAAGTGAAGTCCAGTTTAAAGGTTCT  
GAAAATTAAGAATTGCCCTGTACTGAAGGATTTCCCTTGTGTTGAGATTTCCAGAAAATTTGAAATCGAGCGGACGT  
CGTCAATGGTTGCCCATCTTAGCAAGCTTACCATCTATAATTTGTCCTCTTTCTGTGTGCACAGTTCTCTGCCACCT  
TCCGCAATCAGTGGTTATGGGAATATGGAAGGTGTACCCTTCCGCAATCACTTGAGGAAGTTCATCCATGAGTAT  
TTCTCAAGAAACTCTGCAGCCCTGCTTTTTCAGGGAACCTCACTCTCCTGAGAAAATTTACATGTACTGGGAAACTCAA  
ATTTAGTGTCTCTGCAGCTCCATTCTGCACAGCACTCGAAGAGTTGATAATTTCAAAGCTGTGAGTCTCTTAGTTCT  
CTGGATGGCTTGCAATTGCTTGGCAATCTCAGGTTGCTGCAGGCACATAGATGCCTCAGTGGTCATGGAGAAGATGG  
AAGGTGTATCCTTCCGCAATCACTTGAGGAAGTTCATCCATGAGTATTCTCAAGAAACTCTGCAGCCCTGCTTTT  
CAGGGAACCTCACTCTCCTGAGAAAATTTACATGTAATGGGAAACTCAAATTTAGTGTCTCTGCAGCTCCATTCTGC  
ACAGCACTCGAAGAGTTGATAATTTCAAAGCTGTGAGTCTCTTAGTTCTCTGGATGGCTTGCAATTGCTTGGCAATCT  
CAGGTTGCTGCGGGCACATAGATGCCTCAGTGGTCATGGAGAAGATGGAAGGTGTATCCTTCCGCAATCACTTGAGG  
AACTTTACATCCATGAGTATTCTCAAGAAACTCTGCAGCCCTGCTTTTTCAGGGAACCTCACTCTCCTGAGAAAATTA  
CATGTACTGGAAAACCTCAAATTTAGTGTCTCTGCAGCTCCATTCTGCACAGCACTCGAAGAGTTGATAATTTCAAAG  
CTGTGAGTCTCTTAGTTCTCTGGATGGCTTGAATTGCTTGGCAATCTCAGGTTGCTGCAGGCACATAGATGCCTCA  
GTGGTCATGGAGAAGATGGAAGGTGTATCCTTCCGCAATCACTTGAGGAAGTTCATCCATGAGTATTCTCAAGAA  
ACTCTGCAGCCCTGCTTTTTCAGGGAACCTCACTCTCCTGAGAAAATTTACATGTACTGGGAAACTCAAATTTAGTGTCT  
TCTGCAGCTCCATTCTGCACATCACTCGAAGAGTTGAAAATTTCAAAGCTGTGAGTCTCTTAGTTCTCTGGATGGCT  
TGCAATTGCTTGGCAATCTCAGGTTGCTGCAGGCACATAGATGCCTCAGTGGTCATGGAGAAGATGGAAGGTGTATC  
CTTCCGCAATCACTTGAGGAAGTTCATCAGTGAAGTATTCTCTAGAAAACCTCTGCAGCCCTGCTTCCCTGACGAATCT  
CACCTGCTTAAAACAATTTAGAGGTATCAGGCACCACAAGTTTAAAATCTCTAGAACTGCAATCATGCACTGCACTCG  
AACATTTGAAGATTTCAAGGTTGTGCGTCTGCTTACATTTGGAGGGGTTGCAATTTCTCCACGCCCTCAGGCATATG  
AAAGTATTCAGATGCCTGGCTTGGCTCCATATTTGGGAGTTTGTGAGAGCAGGCTATGAGCTATGCCCACGACT  
GAAAAGGCTCGACATCGATGACCCCTCTATCCTTACCACGTCGTTCTGCAAGCACCTCACCTCCCTCCAACGCCTAG  
AGCTTAATCTATTGCGGAAGTGAAGTGGCAAGACTAACGGATGAGCAAGAGAGAGCGCTTCACTCCTCACGTCCCTG  
CAAGAGCTCCGGTTTTAAGTATTGCTACAATCTCATAGATCTTCTGCGGGGCTCCACAGCCTTCCCTCCCTCAAGAG  
GTTGGAGATCCGGAGTTGAGGAGCATCGCGAGGCTGCCGGAGAAGGGCCTCCACCTTTCGTTTGAAGAAGTGGATA  
TCATCGCTTGCAGTAATGAGCTAGCTCAGCAGTGCAGAACTCTAGCAAGCACTCTGAAAGTCAAATTAATGGGGGA  
TATGTGAAC TGAattactcgggtggtggttaggegcacetttttccacctgcccactggecgtgggctcggttcaggcg  
ttcaagctgctgtaaatccattgcccgaatgacgaccttcagaaccgttacacaatacaaaaggacatatgatggct  
agatcaactgtcgcagagctagctttgggttcacctgaaaacataaggccaaacgcggtgggttcttttaatacagaagta  
tcaaaaattgggttttgggttttaacgaaaagatggttagaaattgggttttaatgtgccagattctgtaccagaattct  
gtattttgcctcggtaattctgtgctacgactgatggtgatttaactgatagcaatcgaccggcaaaaccaatccgc  
tccaatgcattgtcacatacaaatctataattctatctactgaaaaggatgattgctggtcattttcgtgattaca

gaaggaactgtgtatatcgtgctatTTTTGGCATTCCCCATTGGTCCCCAGGTTGTGCTCGGATCAGCCAATTTCCGGT  
GGTTAATTCACCTTTGTTGTGCTCCTCTGTGCCTCAAGAATTGTTCCGCACATGCAATTCAGTTGAGCATCGCACTACG  
CAAGTTTTTTTTGTTAACAAGGAGTGGTTGACAGCATTGCAGGTTGCTAAAACCGTGTCAAAAATTTGCTAACAAA  
AGAATTCCTCCTCAGAAATAGTATGAAAATAAATGCCACATAAGTAATCTGAGTAAAACAGACAGAATCACTAGAGAA  
GACTAACGACAAAATCTTCTTTTTCAATTTCTGTGGTGAAAACTCACTAACTCCGCATATAATCTCATGTATGCAT  
TGGAGGTGCATACCATTTGATCATGTATGCATTTAGCTGAACATTATCAAGAAGCAAATTTATTGCACGGGCAAAC  
ATAAGCTAAACTAATTTCTCAAGCAATTTAATAATCACAAAACAGTCTGCAATACCAAGATATATAAACTTTTGCCA  
GCATGGAGCAACAACACCGAAACACTACAATCAAGACAGCTCCAGAAAAGATTATATGTTGCTACTTCAATTGCCA  
CAGTTACAATCACCCATAATGACACATCAAATTACATAAGAGTATTAAGAGTATATGACAGTTGTAACAAAACA  
GCATTGAGAAGTAGAACAGACAGCCACATGAACCATATTCACTTCTTCAGATCAGAAAGCCTGGTGA  
TACCAATTGCTACCGTAGTCTCCATTTTCACTTATATGTACATAGGACACCTGCGCTATCAGAATAGCCACAAAGC  
CAGTTCCTCGCTACAAATTAATCTTGACTAAATCCAACAGATACCAACTCCTCTTAATCAACTTACAAAACACCT  
ACATTTTGGTGTCTCTACACCACCAATCACACAAAAGGAATTAATCATCCACCAACTCGTATCCTACTGTTAGAA  
TGGAGGCCTTACACCAGAGAATGGGCATTGCGCAGATTTCTGAGACACTGTCCTTTGAGCTCCTGA

**>XA2**

MEEVEAGWLEGGIRWLAETILDNLDADKLEWIRQIRLAADTEKLRAEIEKVDGVVAAVKGRAIGNRSLARSLGRRLR  
GLLYDADDAVDELDFRLQQQVEGGVTRFEAEETVGDGAEDDDIPMDNTDVPEAVAAGSSKKRASKAWEHFTTVEF  
TADGKDSKARCKYCHKDLCCSTKNGTSALRNHLNVCKRKRVTSTDQPVNPSSAGEGASNATGNSVGRKMRMDGTST  
HHEAVSTHPWNKAELSNRIQCMTHQLEEAVNEVMRLCRSSSNQSRQGTTPPATNATSSYLPEPIVYGRAAEMETIK  
QLIMSNRSNGITVLPVIVGNGGIGKTTLAQLVCKDLVIKSQFNVKIWVYVSDKFDVVKITRQILDHVSNSQSHEGISNL  
DTLQODLEEOMKSKKFLIVLDDVWEIRTDWKKLLAPLRPNQVNSSQEEATGNMIILTTRIQSIKSLGTVQSIK  
EALKDDDIWSLFBKVFHAFGNDKHDSSPGLQVLGKQIASELKGNPLAAKTGVSLLGTNLTI DHWDSIIKSEEWKSLQQA  
YGIMQALKLSYDHLNPLQQCVSYCSLFPKGYSFKAQLIQIWIQAQGFVEESSEKLEQKWKYLAELVNSGFLQOVE  
STRFSSEYFVMHDLMDLAQKVSQTEYATIDGSECTELAPSI RHL SIVTDSAYRKEKYRNI SRNEVF EKRLMKVKS  
SKLRSVLVIGQYDSSHFFKYFKDAFKEAQHLRLLQITATYADSDSFLSSLVNSTHLRYLKIIVTEESGRTLPRSLRKY  
HLQVLDIGYRFGIPRISNDINLLSLRHLVAYDEVCSIANIGKMTSLQELGNFIVQNNLSGFVETQLKSMNKLVLQ  
SVSQLENVRTQEEACGAKLKDKQHLEKLHLSWKDAWNGYDSDESYEDEYGS DMNIETE GEELS VGDANGA QSLQH  
NISSELASSEVLEGLEPHHGLKYLRI SGYNGST SPTWLPSSLTCLQTLHLEKCGKWQILPLERLGLLVKLVLIKMRN  
ATELSIPSLEELVLIALPSLNTCSCTSIRNLNSSLKVLKIKNCPVLKVFPLFEISQKFEIERTSSWLP HLSKLT IYN  
CPLSCVHSSLP  
ISGYGEYGRCTLPQSLEELYIHEYSQETLQPCFSGNLTLLRKLHVLGNSNLVSLQLHSCTALEELIIQSCELSLSSLD  
GLQLLGNLRLRLQAHRC  
LSGHGEDGRCILPQSLEELYIHEYSQETLQPCFSGNLTLLRKLHVMGNSNLVSLQLHSCTALEELIIQSCELSLSSLD  
GLQLLGNLRLRLRAHRC  
LSGHGEDGRCILPQSLEELYIHEYSQETLQPCFSGNLTLLRKLHVLENSNLVSLQLHSCTALEELIIQSCELSLSSLD  
GLQLLGNLRLRLQAHRC  
LSGHGEDGRCILPQSLEELYIHEYSQETLQPCFSGNLTLLRKLHVLGNSNLVSLQLHSCTSLEELKIQSCELSLSSLD  
GLQLLGNLRLRLQAHRC  
LSGHGEDGRCILPQSLEELFISEYSLETLQPCFLTNTLCLKQLEVSGETTSLKSLELQSCTALEHLKIQCASLATLE  
GLQFLHALRHMKVFR  
PGLPPYLGSSSEQGYELCPRLERLIDIDPSILTTSFCKHLTSLQRLELNYCGSEVARLTDEQERALQLLTSLQELRF  
KYCYNLIDLPAGLHSLPSLKRLEIRSCRSIARLPEKGLPPSFEELDI IACSNELAQQCRTLASTLKVKINGGYVN

**>Xa31(t)**

ttcaggaagacgggactgaatacatatTTTCTTAATTCCAAAGGCATTcaggatgtttatgaaagataaactactgttg  
TTTTAGGAAACATATTACATCGGCGTTGTcaggtaaagctaacaatagagtgatgatgttcatggtttcaaagagaa  
tataatattcctcgcacatggacaactttactatgctttgtcaaggagatgtaaggcaaacagtaacagggatTTTT  
GCCAAACTACAAACTAGGAAAGAGATAGACCTTACCAGAAATATTATGTATAAAGGTTTCTTGGAAATATTAGAAAA  
ATATAATGACACCGTAGCGTTAGCACGGGCATATTACTAGTAGAACAAAAGAAACACTTATGCATTTATACCCAAAA  
AAAACCGTAATTAATGACCGCATTTCTGACTGTGTAGCGGCCGTCGAAGCATAACTCAAATTTTAAAGCCAGAGA  
TGGCCTAGGGCCAACATCGACATAAAGTGAATAAGTCCACTTCCCTCCCTCACTTTACATCGAGTGTGTATGAT  
GGCCCTAATTCCTAATCAGATGTCGACCCCTCAAGTCTTCAAACCATGCAAAGTAGTCTCCTCGAGGGTATAGAC  
CATATTTCCCTGGTTTCCATTGATGTGGCATAATCAGGGCCACTACCTGAACCATCGCCACGTCAGTCTCTT  
GGCCTGTTCCGATGACGAGCTCGGCCACCACCTCAACATCGTCCATGCTCGGGCGATGGCGAGGAGACAGCTGGGA



AAGGTCTTGAACCACATCACGGCCTCAAGTATCTACGGATATCTGGGTATAATGGATCTACCTCCCCAACTTGGCTT  
CCTTCTTCACTTACCTGTCTGCAAACACTTCATCTAGAAAAATGTGGAAAATGGCAAATACTTCTTTAGAAAGGCT  
AGGGTTACTTGTAAAGCTCGTGTGATCAAAATGAGGAATGCAACAGAACTCTCAATCCCTTCACTGGAGGAGCTTG  
TGTTAATTGCATTGCCAAGCTTGAACACATGCTCCTGCACTTCCATCAGGAACTTGAACCTCCAGTTTAAAGGTTCTG  
AAAATTAAGAATTGCCCTGTACTGAAGGATTTCCCTTGTGTTGAGATTTCCAGAAAATTTGAAATCGAGCGGACGTC  
GTCATGGTTGCCCATCTTAGCAAGCTTACCATCTATAATTGTCTCTTTCTGTGTGCACAGTTCTCTGCCACCTT  
CCGCAATCAGTGGTTATGGAGAATATGGAAGGTGTACCCTTCCGCAATCACTTGAGGAACTTTACATCCATGAGTAT  
TCTCAAGAACTCTGCAGCCCTGCTTTTCAGGGAACCTCACTCTCCTGAGAAAATTACATGTACTGGGAACTCAA  
TTTAGTGTCTCTGCAGCTCCATTCTGCACAGCACTCGAAGAGTTGATAATTCAAAGCTGTGAGTCTCTTAGTTCTC  
TGGATGGCTTGAATTCAGTGGCAATCTCAGGTTGCTGCAGGCACATAGATGCCTCAGTGGTCACTGGAGAAGATGGA  
AGGTGTATCTCTCCGCAATCACTTGAGGAACTTTACATCCATGAGTATTCTCAAGAACTCTGCAGCCCTGCTTTTC  
AGGGAACCTCACTCTCCTGAGAAAATTACATGTAATGGGAACTCAAATTTAGTGTCTCTGCAGCTCCATTCTGCA  
CAGCACTCGAAGAGTTGATAATTCAAAGCTGTGAGTCTCTTAGTTCTCTGGATGGCTTGAATTCAGTGGCAATCTC  
AGGTTGCTGCGGGCACATAGATGCCTCAGTGGTCACTGGAGAAGATGGAAGGTGTATCCTTCCGCAATCACTTGAGGA  
ACTTTACATCCATGAGTATTCTCAAGAACTCTGCAGCCCTGCTTTTCAGGGAACCTCACTCTCCTGAGAAAATTAC  
ATGTACTGGGAACTCAAATTTAGTGTCTCTGCAGCTCCATTCTGCACAGCACTCGAAGAGTTGATAATTCAAAGC  
TGTGAGTCTCTTAGTTCTCTGGATGGCTTGAATTCAGTGGCAATCTCAGGTTGCTGCAGGCACATAGATGCCTCAG  
TGGTCACTGGAGAAGATGGAAGGTGTATCCTTCCGCAATCACTTGAGGAACTTTACATCCATGAGTATTCTCAAGAAA  
CTCTGCAGCCCTGCTTTTCAGGGAACCTCACTCTCCTGAGAAAATTACATGTACTGGGAACTCAAATTTAGTGTCT  
CTGCAGCTCCATTCTGCACATCACTCGAAGAGTTGAAAATTCAAAGCTGTGAGTCTCTTAGTTCTCTGGATGGCTT  
GCAATTCAGTGGCAATCTCAGGTTGCTGCAGGCACATAGATGCCTCAGTGGTCACTGGAGAAGATGGAAGGTGTATCC  
TTCCGCAATCACTTGAGGAACTTTTCATCAGTGGTATTCTCTAGAAAATTCAGGAACTCTGCAGCCCTGCTTCTGACGAATCTC  
ACCTGCTTAAACAATTAGAGGTATCAGGCACCACAAGTTTAAAATCTCTAGAACTGCAATCATGCACTGCACCTCGA  
ACATTTGAAGATTCAAGGTTGTGCGTCGCTTGCTACATTGGAGGGGTTGCAATTCCTCCACGCCCTCAGGCATATGA  
AAGTATTCAGATGCCTGGCTTGCCTCCATATTTGGGGAGTTCGTCAGAGCAGGGCTATGAGCTATGCCACGACTG  
GAAAGGCTCGACATCGATGACCCCTCTATCCTTACCACGTCGTTCTGCAAGCACCTCACCTCCCTCCAACGCCTAGA  
GCTTAACTATTGCGGAAGTGAAGTGGCAAGACTAACGGATGAGCAAGAGAGAGCGCTTCAGCTCCTCACGTCCCTGC  
AAGAGCTCCGGTTTAAAGTATTGCTACAATCTCATAGATCTTCTGCGGGCTCCACAGCCTTCCCTCCCTCAAGAGG  
TTGGAGATCCGGAGTTGCAGGAGCATCGCGAGGCTGCCGGAGAAGGGCCTCCACCTTCGTTTCAAGAACTGGATAT  
CATCGCTTGCAGTAATGAGCTAGCTCAGCAGTGCAGAACTTAGCAAGCACTCTGAAGGTCAAATTAATGGGGAT  
ATGTGAAC TGA ttactcgggtggccttggttaggcgcacctttttccacctgcccactggcggtgggctcgttcaggcgt  
tcaagctgctgtaaattccattggcgcaatgacgaccttcagaaccgttacacaatacaaaggacatatgatggcta  
gatcaactgtcgcagagctagctttgggtcacctgaaaacataaggccaaacgcgtgggttcttttaatacagaagtat  
caaaaattggttttggtttttaacgaaaagatggttagaaaattggtttaattgtgccagattctgtaccagaattctg  
tattttgctccgtaattctgtgctacgactgatggtgtatttaactgatagcaatcgaccggcaaaaaccaatccgct  
ccaatgcattgtcacatacaaaattctataattctatctactgaaaaggatgattgctggttcattttcgtgattacag  
aaggaactgtgtatatcgtgctatttttgcattcacattgtgtcccagggtgtgctcggatcagccaatttcgggtgg  
ttaattcactttggtgtgctcctctgtgcaactcaagaattgttcgcacatgcaattcagttgagcatcgcactacgca  
agtttttttggtaacaaaggagtggttgacagcattgcaggttgctaaaaccgtgtcaaaaatttgctaacaaaag  
aattctcttcagaaatagatgaaaataaatgccacataagtaactctgagtaaaacagacagaatcactagagaaga  
ctaacgacaaaatcttctttttcaatttctgtggtgaaaaactcactaactccgcatataatctcatgtatgcattg  
gaggtgcataccatttcgatcatgtatgcatttagctgaacattatcaagaagcaaaatttattgcacgggcaaacat  
aagctaaactaattctcaagcaatttaataatcaaaaacagctctgcaataccaagatatataaaacttttgccagc  
atggagcaacaacaccgaaacactacaatcaagacagctcccagaaaagattatatggtgctacttcaattgccaca  
gttaacaatcaccataatgacacatcaaattacataagagtattaagagtatatgacagttgtaacaaaacaactgc  
attgagaactagaacagacagccacatgaaccatattcacttcttcagatcagaaagcctggtgaactaccagtcta  
ccaattgctaccgtagtctccatttttcaatttatatgtacataggacacctgctgatcagaatagccacaaagcca  
gttcaactcgctacaaattaatcttgactaaatccaacagataccaactcctcttaatacaacttcaaaaacacctac  
acttttgggtgctctacaccaccaatcacacaaaaggaaattaatcatccaccaactcgtatcctactggttagaatg  
gaggccttacaccagagaatgggcattggcagattctgagacactgctccttgagctccctga

>XA31(t)

MEEVEAGWLEGGIRWLAETILDNLDADKLDIEWIRQIRLAADTEKLRAEIEKVDGVVAAVKGRAIGNRSLARSLGRLR  
GLLYDADDAVDELDFRLQQQVEGGGTRFEAEETVGDGAEDDDI PMDNTDVPEAVAAGSSKKRSKAWEHFTTVEF  
TADGKDSKARCKYCHKDLCTSKNGTSALRNHLNVCKRKRVTSTDQPVNPSSAGEGASNATGNSVGRKMRMDGTST  
HHEAVSTHPWNKAELSNRIQCMTHQLEEAVNEVMRLCRSSSNQSRQTPPATNATSSYLPEPIVYGRAAEMETIK



QLIMSNRSNGITVLPVINGGGIGKTTLAQLVCKDLVIKSQFNVKIWVYVSDKFDVVKITRQILDHVSNOQSHEGINSNL  
DTLQQDLEEQMKSCKFLIVLDDVWEIRTDWKKLLAPLRPNQVNSSQEEATGNMIILTTRIQSIKSLGTVQSIKLE  
EALKDDDIWSLKFVHAFGNDKHDSSPGLQVLGKQIASSELKGNPLAAKTVGSLLGTNLTIIDHWDSIIKSEEWKSLQQA  
YGIMQALKLSYDHLNPLQOCVSYCSLFPKGYFSKAQLIQIWIQAQGFVEESSEKLEQKGWKYLAELVNSGFLQQVE  
STRFSSEYFVMHDLMDLAQKVSQTEYATIDGSECTELAPSIRHLSIVTDSAYRKEKYRNI SRNEVFEEKRLMKVKS  
SKLRSLVLIQYDSSHFFKYFKDAFKEAQLRLLQITATYADSDSFLSLLVNSTHLRYLKIIVTEESGRTLPRSLRKY  
HLQVLDIGYRFGIPRISNDINLLSLRHLVAYDEVCSIANIGKMTSLQELGNFIVQNNLSGFEVTQLKSMNKLVQL  
SVSQLENVRTQEEACGAKLKDKQHLEKLHLSWKDAWNGYDSDESIEDEYGSMDNIETEGEELSVGDANGAQLQHHS  
NISSELASSEVLEGLEPHHGLKYLRI SGYNGSTSPTWLPSSLTCLQTLHLEKCGKWQILPLERLGLLVKLVLIKMRN  
ATELSIPSLEELVLIALPSLNTCSCTSIRNLNSSLKVLKIKNCPVLKVFPLFEISQKFEIERTSSWLPKSLTIYN  
CPLSCVHSSLPESA  
ISGYGEYGRCTLPQSLEELYIHEYSQETLQPCFSGNLTLLRKLHVLGNSNLVSLQLHSCTALEELIIQSCESLSSLD  
GLQLLGNLRLRLQAHR  
LSGHGEDGRCILPQSLEELYIHEYSQETLQPCFSGNLTLLRKLHVMGNSNLVSLQLHSCTALEELIIQSCESLSSLD  
GLQLLGNLRLRLRAHR  
LSGHGEDGRCILPQSLEELYIHEYSQETLQPCFSGNLTLLRKLHVLGNSNLVSLQLHSCTALEELIIQSCESLSSLD  
GLQLLGNLRLRLQAHR  
LSGHGEDGRCILPQSLEELYIHEYSQETLQPCFSGNLTLLRKLHVLGNSNLVSLQLHSCTALEELIIQSCESLSSLD  
GLQLLGNLRLRLQAHR  
LSGHGEDGRCILPQSLEELFISEYSLETLPFCFLTNLTCLKQLEVSGTTSLSKLELQSCCTALEHLKIQGCASLATLE  
GLQFLHALRHMVFR  
PGLPPYLGSSSEQGYELCPRLERLIDDDPSILTTSFCKHLTSLQRLELNYCGSEVARLTDEQERALQLLTSLQELRF  
KYCYNLIDLPAGLHSLPSLKRLEIRSCRSIARLPEKGLPPSFEELDI IACSNELAQQRCTLASTLKVKINGGYVN

>CGS-Xo1<sub>11</sub>

tcctcgagggtatagaccatatttcccctggtttccattgatgtggcatatatcagggccactacctcaaccatca  
ccacgtccagtcctttcggcctgttcgcgatgacgagctcggccaccacctcaacatcgtccatgctgcggcgatgg  
cgaggagacagctgggacggtgaacctcatagctccgtctgttgcaacatcctctcgccatgctcacgtcgccacga  
cacccttgtcctcctgctccgtagcagcctcgcaagctcacgcccggcctcgtcgaggctcctctgtccccgagccg  
cttctagcatcgatgagctgaggaactccccactgcccagggcgatgacgatttggcagggagggctcgattcgcca  
ctccaattcgcagcttcacacctccccctccccctcctattcatccaccaccaacgcggataggagaagggatagagg  
aaggtgtgcgtggacacttacatgttgggtcccatatatttttttactcggatgccacgtcagataaaaacaaccgtc  
ggtcaacatttttcgtattgcggttaggaacgtcattcatgactcgacgcagagctgagggatggcaagtgaactt  
attcccataaaaacttccaaaagtttggaatgctcaacttgggcttctcttcggatgctgaagtgctaattgggcaaaa  
taaccaactagcccacageccatcgaagtggaaagccgacgagtcacacgtcaacgcggcagtagtaatccgagaaaa  
cgcggtgcgcggaagcaatcgatcatcatcagacgattaatccacgacgaccaggagcgtgccccgagccacacg  
cccacacgcactggtgaatcttctcctttccacctagttttcactctgcagctcctctcctctagctactactctgcc  
ttcccctcctcgtctgttgcagccctcttgcaacgccattggccacagctccaaggactgctcctgttccgATGAG  
GAGGTGAAGCCGGTTTGCCTGGAGGGCGGGATCAGGTGGCTGGCGGAGACCATCTGGATAACCTGGACGGCGGACAA  
GCTGGATGAGTGGATTGCCAGATTAGGCTCGCCGCTGACACCGAGAAGCTACGGGCTGAGATCGAGAAGGTGGATG  
GGGTGGTGCCTGCCGTGAAGGGGAGGGCGATCGGGAACAGGTGCTGGCCCGATCTCTCGGCCGTCTCAGGGGGTTG  
CTGTACGACGCCGACGATGCGGTGACGAGCTCGACTACTTCAGGCTCCAGCAGCAGGTCGAGGGAGGAGgtactgt  
ctttgcatatatccgtgccttttaattaagtttgcaagctgcgttgccctgcaacaatggcgtattggcgtcagtttc  
caatccatgcttgcctacagTTACTACACGGTTTGAGGCTGAAGAGACGGTCGGAGATGGAGCAGAGGACGAGGAC  
GATATTCCGATGGACAATACTGATGTACCGGAGGCAGTGGCGGCAGGCAGCAGCAAGAAACGGTCCAAGGCATGGGA  
ACACTTTACTACCGTAGAGTTCACTGCTGACGGGAAGGATTCTAAAGCACGGTGCAAGTACTGCCACAAGGACCTAT  
GTTGCACATCTAAGAACGGGACATCAGCTTTGCGCAACCATCTCAATGTTTGCAAGAGGAAACGTGTAACAAGTACT  
GACCAACCGGTAAATCCATCAAGgtaatgctaattggagttctgaatttagtgtaaatccggtgaagtgtaaatttgg  
cccgttacatctgcttaagatctcattctgtctcctaatcttctaatagccaactcatggctcatttttttcttaata  
tatagtaccggtgatgggtgcaccaaataatgtaattagatgcaaggaaacaaaagtgaacaattgtatataataata  
attatatacaaacatgagtagtgatcaaatccaattctttcaaaaatctactatgcaaaaattgagtgacaaaatc  
tgctgccttttttttacagaaagcaaccaattaataagtaaaaataaaaacgctttgtagctctccaataaaa  
tagctcattgtttcgtttatacttatgtttataaatttaaatttaaaaacttaattttggagttgattttgtggtttt  
cttttcacctattttattttacaacatttgattttgaatagtttaagaatgcgtatataaaaattttaccataagt  
tatttttaaatgttaataaatcgtaaggataatcataagtataagtgaaacgattcgtcttcatctacttaaga  
ttcggttatattgctgacctttctaatacgcctaaccacgatcacatgctcttccagTGCCGGTGAGGGTGCATCAA

TGCAACTGGTAATTCAGTTGGCAGAAAAAGGATGAGAATGGATGGGACTTCAACACACCACGAGGCAGTTAGCACGC  
ACCCTTGGAAACAAGGCTGAACTTTCCAACAGGATCCAATGCATGACTCATCAGTTAGAAGAGGCTGTAAATGAGGTT  
ATGAGGCTATGTCGATCCTCAAGTTCAAACCAGAGTCGACAGGGTACACCACCGGCCACAAATGCAACAACATCGTC  
TTATCTTCCGGAGCCCATAGTGTATGGGAGGGCTGCAGAGATGGAACCATCAAACAGCTGATCATGAGCAATAGAT  
CTAATGGCATAACCGTCTGCCAATTGTAGGCAATGGAGGGATAGGAAAAACCCTTTGGCGCAACTGGTCTGCAAA  
GATCTGGTAATTTAAAGTCAGTTTAAATGTTAAGATATGGGTGTATGTATCTGATAAATTTGATGTAGTTAAGATTAC  
AAGGCAGATTTTGGATCATGTCTCCAACCAGAGCCACGAAGGAATAAGCAACCTTGATACGCTTCAGCAGGATCTTG  
AGGAACAAATGAAATCTAAGAAGTTCCTCATTGTCTTAGATGATGTGTGGGAAATCCGTACAGATGACTGGAAAAA  
CTACTGGCTCCTTTAAGACCTAAAGATCAGGTGAATTCGTACAGGAAGAGGCAACAGGTAATATGATAATTTTGAC  
AACTCGTATACAGAGTATTGCCAAAAGTCTTGAACAGTACAATCAATTAAGTTAGAAGCTCGAAAGATGACGATA  
TATGGTCACTATTTAAAGTGCATGCTTTTGGTAATGATAAACATGATAGTAGTCCAGGCTTACAGGTTCTTGGGAAG  
CAAATTTGTCAGCGAGCTAAAAGGCCAACCCACTGGCAGCAAAAACTGTGGGTTCACTATTAGGAACGAATCTTACCAT  
CGATCATTGGGATAGCATTATAAAGAGTGAAGAATGAAATCCCTGCAACAAGCTTATGGCATCATGCAAGCGCTGA  
AGTTGAGCTATGATCATCTATCCAACCCCTTACAGCAATGCGTCTCTTATTGTTCTCTTTTCCCAAGGGTTATTCT  
TTCAGCAAAGCACAATAATAAATATGGATTGCTCAAGGATTTGTGGAAGAATCCAGTGAGAAGTTGGAGCAGAA  
AGGATGGAATATCTAGCTGAGTTGGTAAATTCGGGTTTCTTCAGCAAGTTGAAAGCACACGGTTTTTCATCAGAAT  
ATTTTGTATGCACGATCTTATGCATGATTTAGCGCAAAAGGTTTCAAAAACAGAATATGCAACTATAGATGGCTCA  
GAGTGCACAGAGTTAGCCCCAAGTATACGCCATTTGTCAATAGTAACTGATTCTGCATACCGCAAGGAGAAATATAG  
AAACATATCTCGTAATGAGGTGTTTGGAGAAAAGGTTGATGAAAGTTAAGTCAAGGAGTAAGTTGAGGTCAGTGGTAT  
TAATTTGGGCAATATGATTCTCATTTTTTTAAATATTTCAAAGATGCTTTCAAGGAAGCACAAACATCTGCGACTGCTG  
CAGATCACTGCAACTTATGCTGATTCTGATTCAATTTCTCTCCAGTTTGGTAAATTTACACATCTCCGGTATCTGAA  
AATTTGTGACCGAAGAATCCGGCAGAACTTTGCCCGATCTCTAAGGAAGTATTACCATCTTCAAGTACTAGATATTG  
GCTATAGATTTGGAATTTCCCGTATATCTAATGATATAAATAATCTTCTCAGCCTGCGGCATCTTGTTCATATGAT  
GAAGTGTGTTCTTCCATTGCTAACATTGGTAAAATGACCTCACTTCAGGAAGTGGCAATTTTATTGTTTTCAGAAATA  
TTTAAAGTGGTTTTGAGGTGACACAATTGAAATCCATGAACAAGCTTGTACAACCTTAGTGTGTCTCAGCTTGAAAATG  
TTAGAACTCAGGAGGAGGCATGTGGGGCAAACTGAAAGACAAAACAACACTTAGAAAAGCTACATTTGTCTGGAAG  
GATGCATGGAATGGATATGACAGTGACGAAAGCTATGAAGATGAATACGGCAGTGATATGAATATAGAAACAGAAGG  
GGAGGAACCTGTCAAGTGGTATGCCAATGGTGCACAAAGCTTACAACATCACAGTAATATAAGCTCTGAACTTGCTT  
CAAGTGAGGTGCTCGAAGGTCTTGAACCACATCAGGCCTCAAGTATCTACGGATATCTGGGTATAATGGATCTACC  
TCCCCAACTTGGCTTCTTCTTCACTTACCTGTCTGCAAAACACTTCACTAGAAAAATGTGGAAAATGGCAAACTACT  
TCCTTTAGAAAAGGCTAGGGTTACTTGTAAAGCTCGTGTTGATCAAAATGAGGAATGCAACAGAAGCTCTCAATCCCTT  
CACTGGAGGAGCTTGTGTTAATTGCATTGCCAAGCTTGAACACATGCTCCTGCACCTCCATCAGGAAGTGAAGTCC  
AGTTTAAAGGTTCTGAAAATTAAGAATTGCCCTGACTGAAGGATTTTCCCTTGTGTTGAGATTTCCAGAAAATTTGA  
AATCGAGCGGACGTCGTCATGGTTGCCCATCTTAGCAAGCTTACCATCTATAATTATCCTCTTTTCTGTGTGCACA  
GTTCTCTGCCACCTTCCGCAATCAGTGGTTATGGAGAATATGGAAGGTGTACCCTTCCGCAATCACTTGAGGAACTT  
TACATCCATGAGTATTCTCAAGAACTCTGCAGCCCTGCTTTTTCAGGGAACCTCACTCTCCTGAGAAAATTACATGT  
ACTGGGAACTCAAATTTAGTGTCTCTGCAGCTCCATTCTGCACAGCACTCGAAGAGTTGATAATTCAAAGCTGTG  
AGTCTCTTAGTCTCTGGATGGCTTGCAATTGCTTGGCAATCTCAGGTTGCTGCAGGCACATAGATGCCTCAGTGGT  
CATGGAGAAGATGGAAGGTGTATCCTTCCGCAATCACTTGAGGAACTTTACATCCATGAGTATTCTCAAGAACTCT  
GCAGCCCTGCTTTTTCAGGGAACCTCACTCTCCTGAGAAAATTACATGTACTGGGAACTCAAATTTAGTGTCTCTGC  
AGCTCCATTCTGCACAGCACTCGAAGAGTTGATAAATCAAAGCTGTGAGTCTCTTAGTCTCTGGATGGCTTGCAA  
TTGCTTGGCAATCTCAGGTTGCTGCAGGCACATAGATGCCTCAGTGGTTCATGGAGAAGATGGAAGGTGTATCCTTCC  
GCAATCACTTGAGGAACTTTACATCCATGAGTATTCTCAAGAACTCTGCAGCCCTGCTTTTTCAGGGAACCTCACTC  
TCCTGAGAAAATTACATGTACTGGGAACTCAAATTTAGTGTCTCTGCAGCTCCATTCTGCACAGCACTCGAAGTG  
TTGATAATTCAAAGCTGTGAGTCTCTTAGTCTCTGGATGGCTTGAATTGCTTGGCAACCTCAGGTTGCTGCAGGC  
ACATAGATGCCTCAGTGGTTCATGGAGAAGATGGAAGGTGTATCCTTCCGCAATCACTTGAGGAACTTTACATCCATG  
AGTATTTCAAGAACTCTGCAGCCCTGCTTTTTCAGGGAACCTCACTCTCCTGAGAAAATTACATGTACTGGGAACT  
TCAAATTTAGTGTCTCTGCAGCTCCATTCTGCACAGCACTCGAAGTGTGATAATTCAAAGCTGTGAGTCTCTTAG  
TTCTCTGGATGGCTTGCAATTGCTTGGCAATCTCAGGTTGCTGCAGGCACATAGATGCCTCAGTGGTTCATGGAGAAG  
ATGGAAGGTGTATCCTTCCGCAATCACTTGAGGAACTTTTTCATCAGTGTAGTATTCTCTAGAAACTCTGCAGCCCTGC  
TTCCTGACGAATCTCACCTGCTTAAAACAATTAAGGGTATCAGGCACCACAAGTTTCAAATCTCTAGAACTGCAATC  
ATGCACTGCACTCGAACATTTGAAGATTCAAGGTTGTGCGTCTGCTTGTACATTGGAGGGGTTGCAATTTCTCCACG  
CCCTCAGGCATATGGAAGTATTAGATGCCTGGCTTGCTCCATATTTGGGGAGTTTCGTGAGAGCAGGGCTATGAG  
CTATGCCACGACTGGAAGGCTCGACATCGATGACCCCTCTATCCTTACCACGTCGTTCTGCAAGCACCTCACCTC  
CCTCCAACGCCTAGAGCTTAACTATTGCGGAAGTGAAGTGGCAAGACTAACGGATGAGCAAGAGAGAGCGCTTACGC  
TCCTCAGTCCCTGCAAGAGCTCCGGTTTAAAGTATTGCTACAATCTCATAGATCTTCTGCGGGGCTCCACAGCCTT  
CCCTCCCTCGAGAGGTTGGAGATCCGGAGTTGCAGGAGCATCGCGAGGCTGCCGGAGAAGGGCCTCCACCTTCTGTT

CGAAGAACTGGATATCATCGCTTGCAGTAATGAGCTAGCTCAGCAGTGCAGAACTCTAGCAAGCACTCTGAAGGTCA  
AAATTAATGGGGGATATGTGAAC TGAattactcgggtggcttggtagggcgacacctttttccacctgcccaactggcggtg  
ggctcggttcaggcggttcaagctgctgtaaattccattgccgcaatgacgacacctcagaaccgttacacaatacaaag  
gacatatgatggctagatcaactgtcgcagagctagctttgggttcacctgaaaacataaggccaaacgcggtggttct  
tttaatcagaagtatcaaaaattgggttttgggttttaacgaaaagatggttagaaattgggttttaatgtgccagattc  
tgtaccagaattctgtattttggctccgtaattctgtgctacgactgatggttatttaactgatagcaatcgaccgg  
caaaaccaatccgctccaatgcattgtcacatacaaaattctataattctatctactgaaaaggatgattgctgttca  
ttttcgtgattacagaaggaactgtgtatatcgtgctatttttgcatcaccattgtgtcccagggtgtgctcggatc  
agccaatttcgggtggtaattcactttgttggctcctctgtgcaactcaagaattggttcgcacatgcaattcagttga  
gcatcgcactacgcaagtttttttggtaacaaaggagtgggtgacagcattgcagggttgctaaaaccgtgtcaaaa  
at ttgctaacaaaagaattctcttcagaaatagtatgaaaataaatgccacataagtaactctgagtaaaacagacag  
aatcactagagaagactaacgacaaaatctctttttcaatttctgtgggtgaaaaactcactaactccgcatataat  
ctcatgtatgcattggaggtgcataccatttcgatcatgtatgcatttagctgaacattatcaagaagcaaatttat  
tgcacgggcaaacataagctaactaattctcaagcaatttaataatcacaaaacagctctgcaataccaagatataat  
aaaacttttggcagcatggagcaacaacaccgaaacactacaatcaagacagctcccagaaaagattatattggtgct  
acttcaattgccacagttacaatcaccataatgacacatcaaatcacataagagtattaagagtatatgacagttg  
taacaaaacaactgcattgagaactagaacagacagccacatgaaccatattcacttcttcagatcagaaagcctgg  
tgaactaccagttaccaattgctaccgtagtctccatttttcaacttatgtacataggacacctgcgctatcaga  
atagccacaaagccagttcactcgctacaaattaatcttgactaaatccaaacagataccaactcctcttaatacaac  
ttacaaaacacctacacttttgggtgctctacaccaccaatcacacaaaaggaaattaatcatccaccaactcgtat  
cctactgttagaatggaggccttacaccagagaatgggcattgccagattctgagacactgtcctttgagctccctg  
a

>CGS-XO1<sub>11</sub>

MEEVEAGLLEGGIRWLAETILDNLDADKLEWIRQIRLAADTEKLRAEIEKVDGVVAAVKGRAIGNRSLARSLGRLR  
GLLYDADDAVDELDFRLQQQVEGGVTRFEAEETVGDGAEDDDI PMDNTDVPEAVAAGSSKKRKSWEHFTTVEF  
TADGKDSKARCKYCHKDLCCSTKNGTSALRNHLNVCKRKRVTSTDQPVNPS SAGEGASNATGNSVGRKRMRMDGTST  
HHEAVSTHPWNKAELSNIQCMTHQLEEAVNEVMRLCRSSSNQSRQGTTPPATNATTSSYLPEPIVYGRAEMETIK  
QLIMSNRSNGITVLPVIVGNGGIGKTTLAQLVCKDLVIKIQFNVIWVYVSDKFDVVKITRQILDHVSNSQ SHEGISNL  
DTLQQDLEEQMKS KFLIVLDDVWEIRTDWKKLLAPLRPKDQVNSSQEEATGNMIILTTRIQSI AKSLGTVQSIKL  
EALKDDDIWLSLFKVHAFGNDKHDSSPGLQVLGKQIASELKG NPLAAKTVGSL LGTNLTIDHWDSI IKSEEWKSLQQA  
YGIMQALKLSYDHLNPLQOCVSYCSLFPKGY SFSKAQLIQIWI AQGFVEESSEKLEQKGWKYLAELVNSGFLOQVE  
STRFSSEYFVMHDLMDLAQKVSQTEYATIDGSECTELAPSIRHLSIVTDSAYRKEKYRNI SRNEVF EKRLMKVKSR  
SKLRSLVLIQYD SHFFKYFKDAFKEA QHLRLLQITATYADSDSFLSSLVNSTHLRYLKI VTEESGRTLPRSLRKY  
HLQVLDIGYRFGIPRISNDINLLSLRHLVAYDEVCS SIANIGKMTSLQELGNFIVQNNLSGFVETQLKSMNKLVQL  
SVSQLENVRTQEEACGAKLKDKQHLEKHLHLSWKDAWNGYDSDESYEDEYGS DMNIETE GEELSVGDANGA QSLQHHS  
NISSELASSEVLEGLEPHHGLKYLRI SGNSTSP T WLPSSLTCLQTLHLEKCGKWQILPLERLGLLVKLVLIKMRN  
ATELSIP SLEELVLI ALPSLNTCSCTSIRNLNSSLKVLKIKNCPVLKVFPLFEISQKFEIERTSSWLP HLSKLT IYN  
YPLSCVHSSLPPSA  
ISGYGEYGRCTLPQSLEELYI HEYSQETLQPCFSGNLTLLRKLHVLGNSNLVSLQLHSCTALEELI IQSCELSLSSLD  
GLQLLGNLRLRLQAHR  
LSGHGEDGRCILPQSLEELYI HEYSQETLQPCFSGNLTLLRKLHVLGNSNLVSLQLHSCTALEELI IQSCELSLSSLD  
GLQLLGNLRLRLQAHR  
LSGHGEDGRCILPQSLEELYI HEYSQETLQPCFSGNLTLLRKLHVLGNSNLVSLQLHSCTALEELI IQSCELSLSSLD  
GLQLLGNLRLRLQAHR  
LSGHGEDGRCILPQSLEELFISEYSLETLQPCFLTNTLCLKQLRVSGTTSFKSLELQSCTALEHLKI QGCASLATLE  
GLQFLHALRHMEVFRC  
PGLPPYLGSSSEQGYELCPRLERLDIDDPSILTTSFCKHLTSLQRLELNYCGSEVARLTDEQERALQLLTSLQELRF  
KYCYNLIDLPAGLHSLPSLERLEIRSCRSIARLPEKGLPPSFEELDI IACSNELAQQCRTLASTLKV KINGGYVN

>Xa14

ttcaggaagacgggactgaatacatatcttcttaattccaaaggcatttaggatgtttatgaaagataattactgttg  
tttttaggaaacatattacatcggcggtgtcaggtaagctgacatagagtgatgatgttcatgggttcaaagagaa  
tatatatattcctcgcacgacaaactttactatgctttgtcaaggagatgtaaggcaaacagtaacagggatttt  
gccaaactacaaactaggaaagagatagacctaccgaaaatattatgtataaagggttcttggaatattagaaaa  
atataatgacaccgtagcggttagcacgggcatattactagtagaacaagaacacttatgcatttatacccaaaa  
aaaaacgtaattaatggacggcatttcgtactgtgtagcggcccgtcgaagcataaactcaaacttttaagccagaga  
taggcctgggccaacatcgacataaactggaataagtccacttgccttccctcaactttacatggagtggtgatgat  
ggcctaattccaataaccagatgtcgaccctcaagtcttcaaaacctgcaaagtagttcctcgagggtatagac  
catatctccctgggttccattgatgtggcatatcagggcccactacctgaaccatcgccacgtccagtcctttc  
ggcctgttcgcgatgacgagctcggccaccacctcaacatcgtccatgctgcgccgatggcgaggagacagctggga  
cgggtaacctcatagctcgtctgttgcaacatcctctcgccatgctcagcgcgccacgacaccttgtcctcctgc  
tccgtagcagcctcgcaagctcagcgcgggctcatcgaggtccctgtccccgagccgctctagcatcgatgag  
ctgaggagctccccactgcccaggcgatgacgatttggcagggagggtcgattcgcccactccaattcgacagct  
cacacctccccctccccctcctattcatccaccacaacgcggataggagaaggatagaggaagggtgtcgtggac  
acttacatattgggtccatataatcttttttttactcggatgccacgtcagataaaaacaaccgtcggccaacatctt  
gtagtggggattagggacgtcatacatgactcgacgcagagctgagggatggcaagtgaacttattcccataaactt  
ccaaaagtttggaaatgctcaacttgggcttctctcctcgatgctgaagtgtcaatgggccaataaccaactagccca  
cagcccacgaaagtgaagccgacgagctccaccgtcaacgcggcagtagtaatccgagaaaaacgcccgtcgcgca  
gcaatcgatcatcatcagacgattaatccacgacgaccaggagcgtgccccgagccacacgcccacacgcactggt  
gaatcttctctttccacctagtttcaactctgcagctcctctcctagctactactcgtcctcccatcctcgctt  
gttgcagccctcttgcacacgccattggccacagctccaaggactgctcctgttccgATGGAGGAGGTGGAAGCCGGT  
TTGCTGGAGGGCGGGATCAGGTGGCTGGCGGAGACCATCCTGGATAACCTGGATGCCGACAAGCTGGATGAGTGGAT  
TCGCCAGATTAGGCTCGCCGCTGACACCGAGAAGCTACGGGCTGAGATCGAGAAGGTGGATGGGGTGGTTCGCTGCCG  
TGAAGGGGAGGGCGATCGGGAACAGGTGCTGGCCCCGATCTCTCGGCCGTCTCAGGGGGTTGCTGTACGACGCCGAC  
GATGCGGTGACGAGCTCGACTACTTCAGGCTCCAGCAGCAGGTGAGGGAGGAGgtactgtctttgcatatccgty  
ccatcttaattaagtgtgcaagctgctgctgcaacaatggcgtcagttccaaccatgcttgtgctacagTTAT  
TACACGGTTTGGAGCTGAAGACACGGTTGGAGATGGAGCAGAGGACGAAGGCGATATCCGATGGACAATACTGATG  
TACCGCGGGCGGTGCGGCAGGCCGACGAGCAAGAAACGGTCCAAGGCATGGGAACACTTTACTCCCCTAGAGTTC  
ACTGCTGATGGGAAGGCTTCTAAAGCACGGTGCAGACTGCCACAAGGACCTATGTTGCACATAAGAACGGGAC  
ATCAGCTTTGCGCAACCATTCTCAATGTTTGAAGAGGAAACGTGTAACAAGTACTGACCAACCGTAAATCCATCAA  
Ggtaatgctaattggagttctgaatlttagtgtaaatccgltgaagtgtaaatltggcccgttacatctgcttaagatc  
tcattctgtctcaatcttcaatagccaactcatgggtcatttttttctcaatataatagtagcgggtgatggtgcac  
caaatgtaattagatgcaaggaaacaaaagtgaacaattgtatatacaaatataattatatactaaaacatgagtag  
tgtatcaaatccaattctttcaaaaatctactatgcaaaaattgagtgaacaaatctgctgccttttttttacagaa  
agcaaccaatataaagtcaaatataaaaacgcttggtagtctccaataaaaatagctcattgtttcgtttataact  
tatgtttataaaatlttaaaatlttaaaacttaatlttggagttgattltgtggtttcttttcatcctatltttatlttac  
aacatlttgatlttgaatagtttaagaatgcttatataaaaatlttaccataagttatlttttaaaatgttaataaat  
cgtaaggataatcataagtataagtgaacgattcgtctctcatctacttaagattgctgttatattgctgaccttc  
taatcgcctaaccacgatcacatgctcttccagTGCCGGTGGAGGTGCATCAAATGCAACTGGTAATTCAGTAGGCA  
GAAAAAGGATGAGAATGGATGGGACTTCAACACACCACGAGGCAGTTAGCACGCACCCTTGAACAAGGCTGAACTT  
TCCAACAGGATCCAATGCATGACTCATCAGTTAGAAGAGGCTGTAAATGAGGTTATGAGGCTATGTCGATCCTCAAG  
TTCAAACAGAGTGCACAGGGTACATCACCGGCCACAAATGCAACAACATCGTCTTATCTTCCGGAGCCCATAGTGT  
ATGGGAGGGCTGCAGAGATGGAAACCATCAAACAGCTGATCATGAGCAATAGATCTAATGGCATAACCGTCTGCCA  
ATTGTAGGCAATGGAGGGATAGGAAAAACCACTTTGGCGCAACTGGTCTGCAAAGATCTGGTAATTTAAAGTCAGTT  
TAATGTTAAGATATGGGTGTATGTATCTGATAAATTTGATGTAGTTAAGATTACAAGGCAGATTTTGGATCATGTCT  
CCAACGAAACACGAAGGAATAAGCAACCTTGATACGCTTCAGCAGGATCTTGAGGAACAAATGAAATCTAAGAAG  
TTCCTCATTGTCTTAGATGATGTGTGGGAAATCCGTACAGATGACTGGAAAAAACTACTGGCTCCTTTAAGACCTAA  
TGATCAGGTGAATTCGTACAGGAAGAGGCAACAGGTAATATGATAATTTGACAACCTCGTATACAGAGTATTGCCA  
AAAGTCTTGAACAGTACAATCAATTAAGTTAGAAGCTCTGAAAGATGACGATATATGGTCACTATTTAAAGTGCAT  
GCTTTTGGTAATGATAAATCATGATAGTAGTCCAGGCTTACAGGTTCTTGGGAAGCAAATGCTAGCGAGCTAAAAGG  
CAACCCACTGGCAGCAAAAACCTGTGGGTTCACTATTAGGAACGAATCTTACCATCGATCATTGGGATAGCATTATAA  
AGAGTGAAGAATGGAAATCCCTGCAACAAGCTTATGGCATCATGCAAGCGCTGAAGTTGAGCTATGATCATCTATCC  
AACCCCTTACAGCAATGCGTCTCTTATTGTTCTCTTTTCCCAAGGGTTATTCTTTTCCAGCAAAGCACAATAATACA  
AATATGGATTGCTCAAGGATTTGTGGAAGAATCCAGTGAGAAGTTGGAGCAGAAAGGATGGAAATATCTAGCTGAGT  
TGGTAAATTCGGGTTTCTTCCAGCAAGTTGAAAGCACACGGTTTTTTCATCAGAATATTTTGTATGCACGATCTTATG  
CATGATTTAGCGCAAAAGGTTTTCACAAACAGAATATGCAACTATAGATGGCTCAGAGTGCACAGAGTTAGCCCCAAG  
TATACGCCATTTGTCAATAGTAACTGATTCTGCATACCGCAAGGAGAAATATAGAAACATATCTCGTAATGAGGTGT

TTGAGAAAAGGTTGATGAAAGTTAAGTCAAGGAGTAAGTTGAGGTCCTGTTATTAATTGGGCAATATGATTCTCAT  
TTTTTTAAATATTTCAAAGATGCTTTCAAGGAAGCACAACATCTGCGACTGCTGCAGATCACTGCAACTTATGCTGA  
TTCTGATTCAATTTCTCTCCAGTTTGGTAAATTCTACACATCTCCGGTATCTGAAAATTGTGACCGAAGAATCCGGCA  
GAACTTTGCCCGATCTCTAAGGAAGTATTACCATCTTCAAGTACTAGATATTGGCTATAGATTTGGAATCCCCGT  
ATATCTAATGATATAAATAATCTTCTCAGCCTGCGGCATCTTGTTCATATGATGAAGTGTGTTCTTCCATTGCTAA  
CATTGGTAAAATGACCTCACTTCAGGAACTAGGCAATTTTTATTGTTTCAAGATAATTTAAGTGGTTTTGAGGTGACAC  
AATTGAAATCCATGAACAAGCTTGTACAACCTTAGTGTGTCTCAACTTGGAAATGTTAGAACTCAGGAGGAGGCATGT  
GGGGCAAACTGAAAGACAAACAACACTTAGAAAAGCTACATTTGTCTTGGAAAGGATGCATGGAATGGATATGACAG  
TGACGAAAGCTATGAAGATGAATACGGCAGTGTATGAATATAGAAACAGAAGGGGAGGAACTGTCAGTTGGTGTATG  
CCAATTGGTGCCCAAAGCTTACAACATCACAGTAATATAAGTCTGAACCTTCAAGTGAAGTGTCTGAAGGCTT  
GAACCATCACGGCTCAAGTATCTACGGATATCTGGGTATAATGGATCTACCTCCCCAACTTGGCTTCTTCTTCT  
ACTTACCTGTCTGCAAAACACTTTCATCTAGAAAAATCTGGAAAATGGCAATACTTCTTTAGAAAGGCTAGGTTAC  
TTGTAAAGCTCGTGTGATCAAAATGAGGAATGCAACAGAACTCTCAATCCCTTCACTGGAGGAGCTTGTGTTAATT  
GCATTGCCAAGCTTGAACACATGCTCCTGCACTTCCATCAGGAACTTGAACCTCCAGTTTAAAGGTTCTGAAAATTAA  
GAATTGCCCTGTACTGAAGGATTTCCCTTGTGTTGAGATTTGCCAGAAATTTGAAATCGAGCGGACGTCGTCATGGT  
TGCCCCATCTTAGCAAGCTTACCATCTATAATTGTCCTCTTCCCTGTGTGCACAGTTCTCTGCCACCTTCATCTATT  
ACATATTGCTATGATTTAACATTCTACGGCAGCAAGGTAGATTTGCTGGATTTACCTCCCTTGGAGGATTTAGTGAT  
TTCACGATGCCCCAAGCTGGTGTCTTCTTGGCGCATAACGACGGAAATGATGAACAGTGAATGGAAGATGGCTCC  
TACCGCTATCACTTGGAAAACCTTGAAGATTAACATATGTTGATTCCCTAAAACGCTGCAGCTCTGCTTCCGGGAAAC  
CTCACCCGCTGAAAAACTAGTAGTGTGGGAAACCAAGTTTAAACATCTCTGCAGCTCCATTCTGCACAGCACT  
CCAAGAGTTGATAATTCGAAGCTGTGAGTCGTTAATTCTCTGGAAGGCTTGAATTTGCTCGGCAATCTCAGGTTGC  
TGTGTGCACACAGATGCCTCAGCGGCCATGAAGAAGATGGAATGTGTATCCTTCCGCAATCACTTGGAGAAATTGAC  
ATCTGGGAGTACTCTCAAGAAACGCTGCAGCCCTGCTTCCAGGGAACCTCACCAGCTTGAAAAAACTAGTAGTACA  
GGGAAGCCAAAAGTTAATATCTCTGCAGCTGTATTCCCTGCACAGCACTCCAAGAGTTGATGATTGAAAGTTGTGTGT  
CGCTTAATTCTCTGGAAGGCCTGCAATGGCTCGTCAACCTCAGGTTGCTGCGGGCACACAGATGCCTCAGTGGTTAT  
GGAGAAAATGGAAGGTGTATCCTTCCACAATCACTTGGAGAACTTTACATCAGAGAGTATTCTCAAGAAACGCTGCA  
GCCCTGCTTCCAGGGAACCTCACCAGCTTGAAAAAACTAGTAGTACAGGGAAGCCAAAAGTTAATATCTCTGCAGC  
TGTATTCTCTGCACAGCACTCCAAGAGTTGATGATTGGAAGTTGTGTGTCTGCTTAATTCTCTGGAAGGCCTGCAATGG  
CTCGTCAACCTCAGGTTGCTGCGGGCACACAGATGCCTCAGTGGTTATGGAGAAAATGGAAGGTGTATCTTCCACA  
ATCACTTGAAGGTTCTTACATCAGAGAGTATTCTCAAGAAATTTACAGCCCTGCTTCCAGCAATCTCACTTGTCT  
TAAAAAGATTAGAGGTATCAGGCCTGGAAGTTTCAAATCTCTGAAGTTGCAATCATGCAGTGCCTCGAACATTTG  
AGGATTGAATGGTGTGCGTCTGCTACATTAGAGGGCTTGAATTTCCCTCCATGCCCTTAAAGCATTGGAAGTATT  
CAGATGCCCTGGCTTGCTCCATATTTGGGGAGTTTATCAGGGCAGGGCTATGAGCTATGCCCACTACTGGAAAGGC  
TCGAGATCGATGACCCCTCTATCCTTACCACGTCGTTTTGCAAGAACCTCACCTCTCTCCAATACCTAGAGCTTTGC  
AGTCACGGATTGGAATGGAAGACTAACGGACGAGGAAGAGAGCGCTTCAACTCCTCACTTCCCTGCAAGAGCT  
CCGATTTAACTGTTGCTACAATCTCGTAGATCTTCCACAGGGCTCCACAACCTTCTCTCCCTCAAGAGGTTGGAGA  
TCTGGAATTGCGGGAGCATCGCGAGGCCGCTGGAAGGGTCTCCACCTTCTGTTGGAAGAAGTGGATATCTCGGT  
TGTAGTAAAGAGCTAGTTTCAAGCAGTGCAGAACTCTAGCAAGCAAGCTGAAGGTCGAAATTAATGGGGAATATGTGAA  
CTGAattactcgggtggcttggtagggcgacaccttttccacctgtccaactggcggtgggctcggttcaggcggtcaagct  
gctgtaaattccattgcccgaatgacgaccttcagaaccggtacacaatacaaaggacatatgatggctagatcaac  
tgtcgcagagctagctttgggtccacctgaaaacataaggccaaacgcggtgggttcttttaatacagaagtatcaaaaat  
tggttttggtttttaacgaaaagatggttagaaaattggtttttaatgtgccagattctgtaccagaattctgtattttg  
ctccgtaattctgtgctacgactgatggtgtatattaactgatagcaatcgaccggcaaaaaccaatccgctccaatgc  
attgtcacatacaaaattctataattctatctactgaaggaactgtgtatatctgtgctatttttgcatcacttggtg  
ttccagggtgtgctcggatcagccaatttcgggtggtaattcactttgtgtgtcctctgtgcaagtgtgcaactcaag  
aattggtcgcacatgcaatcagttgagcatcgcactacgcaagttttttttttttttgttaacaaaggagtggttga  
cagcattgcaggttgctaaaacagtggtcaaaaatttgctaaacaaagaattctcttcagaaatagtatgaaaataaa  
tgccacataaagtaactctgagtataaacagacagaactcactagagaagactaacgacaaaactcttcttttctatttct  
gtggtgaaaaactcagcatataatctcatgtatgcatgtgaggtgcataccatttcgatcatgtatgcatatttagctg  
aacattatcaagaagcaaatatttgacgggcaaccataagctaaactaattctcaagcaatthaataatcaaaa  
acagctctgcaataccaagatatataaaacttttgccagcatggagcaacaacactgaaacactacaatcaagacagc  
tcccagaaaagattatatgttgetacttcaattgcccacagttacaatcaccataatgacacatcaaatcacataag  
agtattaagagtatatgacagttgtaacaaaacaactgcattgagaactagaagaacagacagccacatgaaccata  
ttcacttcttcagatcagaaagcctgggtgaactaccagttaccaattgctaccgtagtctccatttttctacttata  
tgtacataggacacctgctctatcagaatagcaacaaagccagttcactcgctacaaattaatcttgactaaatcca  
aatagataccaactcctcttaatacaacttaacaaacacctacacttttggttgtctctacaccaccaatcacacaaaa

ggaaattaatcatccacactactcgatcctactgtagaatggaggccttacaccagagaatgggcattgccagatt  
ctgagacactgtcctttgagctccctga

>XA14

MEEVEAGLLEGGIRWLAETILDNLDADKLDDEWIRQIRLAADTEKLRAEIEKVDGVVAAVKGRAIGNRSLARSLGRLR  
GLLYDADDAVDELDFRLQQQVEGGVITRFEAEDTVGDGAEDGDI PMDNTDVPAAAAAGRSSKRSKAWEHFTPVE  
FTADGKASKARCKYCHKDLCCSTSKNGTSALRNHLNVCKRKRVTSTDQPVNPSSAGEGASNATGNSVGRKMRMDGTS  
THHEAVSTHPWNKAELSNRIQCMTHQLEEAVNEVMRLCRSSSSNQSRQGTSPATNATTSSYLPEPIVYGRAEMETI  
KQLIMSNRSNGITVLPVINGGGIGKTTLAQLVCKDLVIKSQFNVKIWVYVSDKFDVVKITRQILDHVSQNHEGINS  
LDTLQODLEEOMKSKKFLIVLDDVWEIRTTDDWKKLLAPLRPNQVNSSQEEATGNMIILTTRIQSI AKSLGTVQS  
LEALKDDDIWLSLKFVHAFGNDKHDSSPGLQVLGKQIASSELKGNPLAAKTVGSLGTLTNTIDHWDSIIKSEEWKSLQ  
AYGIMQALKLSYDHLNPLQCVSYCSLFPKGYFSKAQLIQIWI AQGFVEESSEKLEQKGWKYLAELVNSGFLQOV  
ESTRFSSEYFVMHDLMDLAQKVSQTEYATIDGSECTELAPSI RHLSIVTDSAYRKEKYRNI SRNEVF EKRLMKVKS  
RSKLRSLVLIGQYDSHFFKYFKDAFKEA QHLRLLQITATYADSDSFLSSLVNSTHLRYLKIIVTEESGRTLPRSLRKY  
YHLQVLDIGYRFGIPRISNDINNLLSLRHLVAYDEVCSIANIGKMTSLQELGNFIVQNNLSGFVETQLKSMNKLQV  
LSVSQLGNVRTQEEACGAKLKDQHLKHLHSWKDAWNGYDSDESYEDEYGS DMNIETEGEELSVDANGAQLQHH  
SNISSELASSEVLEGLEPHHGLKYLRI SGYNGSTSPTWLPSSLTCLQTLHLEKCGKWQILPLERLGLLVKLVLIKMR  
NATELSIPSLEELVLI ALPSLNTCSCTSIRNLNSSLKVLKIKNCPVLKVFPLFEICQKFEIERTSSWLP HLSKLTII  
NCPLSCVHSSLPPSS  
ITYCYDLTFYGSKVDFAGFTSLEELVIRCPKLVSFLAHNDGNDEQSNGRWLLPLSLGKLEINYVDSLKTLQLCFPG  
NLTRLKLVVLGNQSLTSLQLHSCALQELIIRSCESLNSLEGLQLLGNLRLLLCAHRC  
LSGHEEDGMCILPQSLEEIDIWEYSQETLQPCFPGNLTSLKLVVQGSQKLI SLQLYSCTALQELMIESCVSLNSLE  
GLQWLVNLRLLRAHRC  
LSGYGENGRCILPQSLEELYIREYSQETLQPCFPGNLTSLKLVVQGSQKLI SLQLYSCTALQELMIGSCVSLNSLE  
GLQWLVNLRLLRAHRC  
LSGYGENGRCILPQSLEGLYIREYSQEILQPCFQTNLTCLKRLEVSGTGSFKSLKLQSCTALEHLRIEWCASLATLE  
GLQFLHALKHLEVFRC  
PGLPPYLGSLSGQYELCPLLERLEIDDPSILTTSFCKNLTSLOYLELC SHGLEMERLTDEEERALQLLTSLOELRF  
NCCYNLVDLPTGLHNLLSLKRLEIWNCGSIARPLEKGLPPSLEELDILGCSKELVQQCRTLASKLKVEINGEYVN

>Xa45(t)

ttcaggaagacgggactgaatacatatcttcttaattccaaaggcattcaggatgtttatgaaagataattactgttg  
tttttaggaaacatattacatcggcggtgtcaggtaagctgacatagagtgatgatgttcatggttccaaatgagaa  
tatataatctcgcgatggacaactttactatgctttgtcaaggagtagtaaggcaaacagtaacagggatTTTT  
gccaaactacaaactaggaagagatagaccttaccgaaaatattatgtataaaggTTTTcttggaatattagaaaa  
atataatgacaccgtagcgttagcacgggcatattactagtagaaciaaaagaaacacttatgcattttatacccaaaa  
aaaaacgtaattaatggaccgcatttctgactgtgtagcggcccgtcgaagcataaactcaacttttaagccagaga  
tgggcctgggccaacatcgacataaaactggaataagtccactttccttccctcaactttacatggagtggtgatgat  
ggccctaattcccaataaccagatgtcgaccctcaagtcttcaaaaccatgcaaagtagttcctcgagggtatagac  
catatctccctgggtttccattgatgtggcatatatcagggcccactacctgaaccatcgccacgtccagtcctttc  
ggcctgttcgcatgacgagctcggccaccacctcaacatcgtccatgctcggcgatggcgaggagacagctggga  
cgggtgaacctcatagctccgtctgttgcaacatcctctcgccatgctcacgcccacgacacccttgtcctcctgc  
tccgtagcagcctcgcaagctcacgcccgggtctcatcgagggtcccctgtccccgagccgcttctagcatcgatgag  
ctgaggagctccccactgccgaggcgatgacgatttggcagggagggtcgcattcggccactccaattcgcagcgt  
cacacctccccctccccctcctattcatccaccaccaacgcggataggagaagggatagaggaaagtgtgcgtggac  
acttacatattggttccatataTTTTTTTTactcggatgccacgtcagataaaaacaaccgtcgggtcaacatttttc  
gtagtggggattagggacgtcatacatgactcgacgcagagctgagggatggcaagtgaacttattcccataaactt  
ccaaaagtttggaaatgctcaacttgggcttctctcggatgctgaagtgctaattgggccaataaccaactagccca  
cagcccactgaagtggagccgacgaggtccaccgtcaacgcggcagtagtaatccgagaaaacgcggggtcgcgcgaa  
gcaatcgatcatcatcagacgattaatccacgcgacccaggagcgtgccccgagccacacgcccacgcactggt  
gaaatctctcctttccacctagttttctcctcagctcctcctcctagctactactctgcttccatcctcgtctt  
gttgcagccctcttgcacacgccattggccacagccaaggactgctcctgttccgATGAGGAGGTGGAAGCCGGT  
TTGCTGGAGGGCGGGATCAGGTGGCTGGCGGAGACCATCCTGGATAACCTGGACGCCGACAAGCTGGATGAGTGGAT  
TCGCCAGATTAGGCTCGCCGCTGACACCGAGAAGCTACGGGCTGAGATCGAGAAGGTGGATGGGGTGGTTCGCTGCCG

TGAAGGGGAGGGCGATCGGGAACAGGTCGCTGGCCCGATCTCTCGGCCGTCTCAGGGGGTTGCTGTACGACGCCGAC  
GATGCGGTCGACGAGCTCGACTACTTCAGGCTCCAGCAGCAGGTCGAGGGAGGAGgtactgtctttgcatatatccg  
tgccttttaattaagtttgcaagctgcgttgccctgcaacaatggcgtattggcgtcagttccaatccatgcttggtg  
ctacagTTACTACACGGTTTTGAGGCTGAAGAGACGGTCGGAGATGGAGCAGAGGACGAGGACGATATTCGGATGGAC  
AATACTGATGTACCGGAGGCAGTGGCGGCAGGCAGCAGCAAGAAACGGTCCAAGGCATGGGAACACTTTACTACCGT  
AGAGTTCACTGCTGACGGGAAGGATTCTAAAGCACGGTGCAAGTACTGCCACAAGGACCTATGTTGCACATCTAAGA  
ACGGGACATCAGCTTTGCGCAACCATCTCAATGTTTGCAAGAGGAAACGTGTAACAAGTACTGACCAACCGGTAAAT  
CCATCAAGgtaatgctaattggagttctgaattagtgtaaatccggtggaagtgtaaatttggcccgttacatctgct  
taagatctcattctgtctctctaatcttctaatagccaactcatggtcatttttttctctaatatataagtaccggtgat  
ggtgcaccaaatgtaattagatgcaaggaacaaaagtgaacaattgtatataatcaaatataattatctaaaaca  
tgagtagtgatcaaatccaattctttcaaaaatctactatgcaaaattgagtgacaaaatctgctgcctttttttt  
ttacagaagcaaccaattaatataagtcaaaataaaaaacgctttgtagctctcaataaaaatagctcattgcttccg  
ttataacttatgtttataaatttaaatttaaaacttaatttggagttgattttgtggtttcttttctcctattt  
tattttacaacatttgaatttgaatagtttaagaatgcgtatataaaaaattttaccataagttattttttaaattgt  
taataaatcgtaaggataatcataagtataagtgaacgattcgctcttcatctacttaagattgcggttatattgct  
gacctttctaactgcctaaccacgatcacatgctcttccagTGCCGGTGAGGGTGCATCAAATGCAACTGGTAATTC  
AGTTGGCAGAAAAAGGATGAGAATGGATGGACTTCAACACACCACGAGGCAGTTAGCACGCACCCTTGGAACAAGG  
CTGAACCTTTCCAACAGGATCCAATGCATGACTCATCAGTTAGAAGAGGCTGTAAATGAGGTTATGAGGCTATGTCGA  
TCCTCAAGTTCAAACCAGAGTCGACAGGGTACACCACCGGCCACAAATGCAACAACATCGTCTTATCTTCCGGAGCC  
CATAGTGTATGGGAGGGCTGCAGAGATGGAAACCATCAAACAGCTGATCATGAGCAATAGATCTAATGGCATAACCG  
TCCTGCCAATTGTAGGCAATGGAGGGATAGGAAAAACCCTTTGGCGCAACTGGTCTGCAAAGATCTGGTAATTA  
AGTCAGTTTAAATGTTAAGATATGGGTGTATGTATCTGATAAATTTGATGTAGTTAAGATTACAAGGCAGATTTTGG  
TCATGTCTCCAACCAGAGCCACGAAGGAATAAGCAACCTTGATACGCTTCAGCAGGATCTTGAGGAACAAATGAAAT  
CTAAGAAGTTCCTCATTGTCTTAGATGATGTGTGGGAAATCCGTACAGATGACTGGAAAAACTACTGGCTCCTTTA  
AGACCTAATGATCAGGTGAATTCGTACAGGAAGAGGCAACAGGTAATATGATAATTTTGACAACCTCGTATACAGAG  
TATTGCCAAAAGTCTTGGAACAGTACAATCAATTAAGTTAGAAGCTCTGAAAGATGACGATATATGGTCACTATTTA  
AAGTGCATGCTTTTGGTAATGATAAACATGATAGTAGTCCAGGCTTACAGGTTCTTGGGAAGCAAATTCGTAGCGAG  
CTAAAAGGCAACCCACTGGCAGCAAAAACTGTGGGTTCACTATTAGGAACGAATCTTACCATCGATCATTGGGATAG  
CATTATAAAGAGTGAAGAATGGAAATCCCTGCAACAAGCTTATGGCATCATGCAAGCGCTGAAGTTGAGTCTGATC  
ATCTATCCAACCCCTTACAGCAATGCGTCTCTTATTGTTCTCTTTTCCCAAGGGTTATTCTTTTCCAGCAAAAGCACA  
CTAATACAAATATGGATTGCTCAAGGATTTGTGGAAGAATCCAGTGAGAAGTTGGAGCAGAAAGGATGGAAATATCT  
AGCTGAGTTGGTAAATTCGGGTTTTCTTCCAGCAAGTTGAAAGCACACGGTTTTTCATCAGAATATTTTGTATGCACG  
ATCTTATGCATGATTTAGCGCAAAAGGTTTTCAAAACAGAATATGCAACTATAGATGGCTCAGAGTGCACAGAGTTA  
GCCCAAGTATACGCCATTTGTCAATAGTAACTGATTCTGCATACCGCAAGGAGAAATATAGAAACATATCTCGTAA  
TGAGGTGTTTGGAAAAGGTTGATGAAAGTTAAGTCAAGGAGTAAGTTGAGGTCACTGGTATTAATTGGGCAATATG  
ATTCTCATTTTTTTAAATATTTCAAAGATGCTTTCAAGGAAGCACAACATCTGCGACTGCTGCAGATCACTGCAACT  
TATGCTGATTCTGATTCAATTTCTCTCCAGTTTGGTAAATCTACACATCTCCGGTATCTGAAAATTGTGACCGAAGA  
ATCCGGCAGAACTTTGCCCGATCTCTAAGGAAGTATTACCATCTTCAAGTACTAGATATTGGCTATAGATTTGGAA  
TTCCCGTATATCTAATGATATAAATAATCTTCTCAGCCTGCGGCATCTTGTTCATATGATGAAGTGTGTTCTTCC  
ATTGCTAACATTGGTAAAATGACCTCACTTCCAGGAAGTGGCAATTTTATTGTTTCCAGAAATTTAAGTGGTTTTGA  
GGTGACACAATTGAAATCCATGAACAAGCTTGTACAACCTTAGTGTGTCTCAGCTTGAAAATGTTAGAACTCAGGAGG  
AGGCATGTGGGGCAAACTGAAAGACAAACAACACTTAGAAAAGCTACATTTGTCCTGGAAGGATGCATGGAATGGA  
TATGACAGTGACGAAAGCTATGAAGATGAATACGGCAGTGATATGAATATAGAAACAGAAGGGGAGGAACTGTCAGT  
TGGTGTATGCCAATGGTGGCCAAAGCTTACAACATCACAGTAATATAAGCTCTGAACTTGCTTCAAGTGAAGTGTCTG  
AAGGTCTTGAACCACATCACGGCCTCAAGTATCTACGGATATCTGGGTATAATGGATCTACCTCCCCAACTTGGCTT  
CCTTCTTCACTTACCTGTCTGCAAACTTCACTTAGAAAAATGTGGAAAATGGCAAATACTTCTTTAGAAAAGGCT  
AGGGTTACTTGTAAAGCTCGTGTGATCAAAATGAGGAATGCAACAGAACTCTCAATCCCTTCACTGGAGGAGCTTG  
TGTTAATTGCATTGCCAAGCTTGAACACATGCTCCTGCACTTCCATCAGGAACCTTGAACCTCCAGTTTAAAGGTTCTG  
AAAATTAAGAATTGCCCTGACTGAAGGTATTTCCCTTGTGTTGAGATTTCCAGAAAATTTGAAATCGAGCGGACGTC  
GTCATGGTTGCCCATCTTAGCAAGCTTACCATCTATAATTATCCTCTTTCTGTGTGCACAGTTCTCTGCCACCTT  
CCGCAATCAGTGGTTATGGAGAATATGGAAGGTGTACCCTTCCGCAATCACTTGAGGAACTTTACATCCATGAGTAT  
TCTCAAGAACTCTGCAGCCCTGCTTTTCCAGGAACTCACTCTCCTGAGAAAATTACATGTACTGGGAACTCAAA  
TTTGTGTCTCTGCAGCTCCATTCTGCACAGCACTCGAAGAGTTGATAATTCAAAGCTGTGAGTCTCTTAGTTCTC  
TGGATGGCTTGAATTGCTTGGCAATCTCAGGTTGCTGCAGGCACATAGATGCCTCAGTGGTCATGGAGAAGATGGA  
AGGTGTATCCTTCCGCAATCACTTGGGAACCTTTACATCCATGAGTATTCTCAAGAACTCTGCAGCCCTGCTTTTC  
AGGGAACCCCACTCTCCTGAGAAAATTACATGTACTGGGAACTCAAATTTAGTGTCTCTGCAGCTCCATTCTGCA  
CAGCACTCGAAGAGTTGATAATTCAAAGCTGTGAGTCTCTTAGTTCTCTGGATGGCTTGAATTGCTTGGCAATCTC

AGGTTGCTGCAGGCACATAGATGCCTCAGTGGTCATGGAGAAGATGGAAGGTGTATCCTTCCGCAATCACTTGAGGA  
ACTTTACATCCATGAGTATTCTCAAGAACTCTGCAGCCCTGCTTTTCAGGGAACCTCACTCTCCTGAGAAAATTAC  
ATGTACTGGGAACTCAAATTTAGTGTCTCTGCAGCTCCATTCTGCACAGCACTCGAAGAGTTGATAATTCAAAGC  
TGTGAGTCTCTTAGTTCTCTGGATGGCTTGCAATTGCTTGGAATCTCAGGTTGCTGCAGGCACATAGATGCCTCAG  
TGGTCATGGAGAAGATGGAAGGTGTATCCTTCCGCAATCACTTGAGGAACTTTACATCCATGAGTATTCTCAAGAAA  
CTCTGCAGCCCTGCTTTTCAGGGAACCTCACTCTCCTGAGAAAATTACATGTACTGGGAACTCAAATTTAGTGTCT  
CTGCAGCTCTATTCTGCACAGCACTCGAAGAGTTGATAATTCAAAGCTGTGAGTCTCTTAGTTCTCTGGATGGCTT  
GCAATTGCTTGGCAATCTCAGGTTGCTGCAGGCACATAGATGCCTCAGTGGTCATGGAGAAGATGGAAGGTGTATCC  
TTCCGCAATCACTTGAGGAACTTTACATCCATGAGTATTCTCAAGAACTCTGCAGCCCTGCTTTTCAGGGAACCTC  
ACTCTCTGAGAAAATTACATGTACTGGGAACTCAAATTTAGTGTCTCTGCAGCTCCATTCTGCACAGCACTCGA  
AGTGTGATAATTCAAAGCTGTGAGTCTCTTAGTTCTCTGGATGGCTTGCAATTGCTTGGCAACCTCAGGTTGCTGC  
AGGCACATAGATGCCTCAGTGGTCATGGAGAAGATGGAAGGTGTATCCTTCCGCAATCACTTGAGGAACTTTACATC  
CATGAGTATTCTCAAGAACTCTGCAGCCCTGCTTTTCAGGGAACCTCACTCTCCTGAGAAAATTACATGTACTGGG  
AAACTCAAATTTAGTGTCTCTGCAGCTCCATTCTGCACAGCACTCGAAGTGTGATAATTCAAAGCTGTGAGTCTC  
TTAGTTCTCTGGATGGCTTGCAATTGCTTGGCAATCTCAGGTTGCTGCCGGCACATAGATGCCTCAGTGGTCATGGA  
GAAGATGGAAGGTGTATCCTTCCGCAATCACTTGAGGAACTTTTCATCAGTGTGAGTATTCTCTAGAACTCTGCAGCC  
CTGCTTCTGACGAATCTCACCTGCTTAAAACAATTAAGGGTATCAGGCACCACAAGTTTCAAATCTCTAGAAGTGC  
AATCATGCACTGCACTCGAACATTTGAAGATTCAAGGTTGTGCGTCTGCTACATTGGAGGGGTTGCAATTCCTC  
CACGCCCTCAGGCATATGGAAGTATTAGATGCCTGGCTTGCCCTCCATATTTGGGGAGTTTCGTGAGAGCAGGGCTA  
TGAGCTATGCCCACGACTGGAAAGGCTCGACATCGATGACCCATCTATCCTTACCACGTCTGTTCTGTAAGCACCTCA  
CCTCCCTCCAACGCCTAGAGCTTAACTATTGCGGAAGTGAAGTGGCAAGACTAACGGATGAGCAAGAGAGAGCGCTT  
CAGCTCCTCACGTCCCTGCAAGAGCTCCGGTTAAGTATTGCTACAATCTCATAGATCTTCTGCGGGGCTCCACAG  
CCTTCCCTCCCTCGAGAGGTTGGAGATCCGGAGTTGCAGGAGCATCGCGAGGCTGCCGGAGAAGGGCCTCCCACCTT  
CGTTCGAAGAACTGGATATCATCGCTTGCAAGTATGAGCTAGCTCAGCAGTGCAGAACTCTAGCAAGCACTCTGAAG  
GTCAAATTAATGGGGGATATGTGAAC TGAattactcggctggtgctgtaggcgcacctttttccacctgcccaactgg  
cgtgggctcgttcaggcgttcaagctgctgtaaattccattgcccgaatgacgaccttcagaaccgttacacaatac  
aaaggacatatgatggctagatcaactgtcgcagagctagctttgggttcacctgaaaacataaggccaaacgcgctgg  
ttcttttaatacagaagtatcaaaaattgggttttgggttttaacgaaaagatgtagaaaattgggttttaatgtgccag  
attctgtaccagaattctgtattttggctccgtaattctgtgctacgactgatggtgtatttaactgatagcaatcga  
ccggcaaaaccaatccgctccaatgcattgtcacatacaaattctataattctatctactgaaaaggatgattgctg  
ttcattttcgtgattacagaaggaactgtgtatatacgtgctattttggcattccccattgggtccccagggtgtgctc  
ggatcagccaatttcgggtgggttaattcactttgtgtgctcctctgtgactcaagaattggttcgcacatgcaattca  
ggtgagcatcgcactacgcaagtttttttggtaacaaaggagtggttgacagcattgcagggttgctaaaaccgtgt  
caaaaatttgctaacaaaagaattctcttcagaaatagtatgaaaataaatgccacataagtaattctgagtaaaaaca  
gacagaatcactagagaagactaacgacaaaatcttctttttcaatttctgtggtgaaaaactcactaactccgcat  
ataatctcatgtatgcattggagggtgcataaccatttcgatcatgtatgcatttagctgaacattatcaagaagcaaa  
tttattgcacgggcaaacataagctaaactaattctcaagcaatttaataatcaaaaacagctctgcaataccaaga  
tatataaaacttttggcagcatggagcaacaacaccgaaacactacaatcaagacagctcccagaaaagattatag  
ttgctacttcaattgcccacagttacaatcaccataatgacacatcaaattacataagagattaaagagtatatgac  
agttgtaacaaaacaactgcattgagaactagaacagacagccacatgaacatattcacttcttcagatcagaaaag  
cctggtgaactaccagctaccaattgctaccgtagtctccatttttcacttatatgtacataggacacctgcgcta  
tcagaatagccacaaagccagttcactcgtacaaaattaatcttgactaaatccaaacagataccaactcctcttaa  
tcaacttacaaaacacctacacttttgggtgtctctacaccaccaatcacacaaaaggaaattaatcatccaccaact  
cgtatcctactgttagaatggaggccttacaccagagaatgggcattgccagattctgagacactgtcctttgagct  
ccctga

>XA45(t)

MEEVEAGLLEGGIRWLAETILDNLADADKLEWIRQIRLAADTEKLRAEIEKVDGVVAAVKGRAIGNRSLARSLRRLR  
GLLYDADDAVDELDFRLQQQVEGGVTRFEAEETVGDGAEDDDIPMDNTDVPEAVAAGSSKKRSKAWEHFTTVEF  
TADGKDSKARCKYCHKDLCTSKNGTSALRNHLNVCKRKRVTSTDQPVNPSSAGEGASNATGNSVGRKMRMDGTST  
HHEAVSTHPWNKAELSNRIQCMTHQLEEAVNEVMRLCRSSSNQSRQGTTPPATNATTSSYLPEPIVYGRAEMETIK  
QLIMSNRSNGITVLPVINGNGGIGKTTLAQLVCKDLVIKSQFNVKIWWVYVSDKFDVVKITRQILDHVSNSQSHEGISNL  
DTLQQDLEEQMKSCKFLIVLDDVWEIRTDDWKKLLAPLRPNQVNSQEEATGNMIILTTRIQSIAKSLGTVQSIKL  
EALKDDDIWSLFKVHAFGNDKHDSSPGLQVLGKQIASSELKGNPLAAKTVGSLLGTNLTIDHWDSIIKSEEWKSLQQA  
YGIMQALKLSYDHLNPLQCVSYCSLFPKGYSFSAQLIQIWIQAQGFVEESSEKLEQKGWKYLAELVNSGFLQQVE  
STRFSSEYFVMHDLMDHLAQLKVSQTEYATIDGSECTELAPSI RHLSIVTDSAYRKEKYRNI SRNEVF EKRLMKVKS R



SKLRSLVLIGQYDSHFFKYFKDAFKEAQLRLLQITATYADSDSFLSSLVNSTHLRYLKIIVTEESGRTLPRSLRKY  
 HLQVLDIGYRFGIPRISNDINLLSLRHLVAYDEVCSIANIGKMTSLQELGNFIVQNNLSGFVETQLKSMNKLQV  
 SVSQLENVRTQEEACGAKLKDKQHLEKLHLSWKDAWNGYDSDES YEDEYGS DMNIETE GEEL SVGDANGA QSLQH  
 NISSELASSEVLEGLEPHGLKYLRI SGYNGSTSP TWLPS SLTCLQTLHLEKCGKWQILPLERLGLLVKLVLIKMRN  
 ATELSIP SLEELVLI ALPSLNTCSCTSIRNLNSSLKVLIKNC PVLKVFP LFEISQKFEIERTSSWLP HLSKLT IYN  
 YPLSCVHSSSLPPSA  
 ISGYGEYGRCTLPQSLEELYIHEYSQETLQPCFSGNLTLLRKLHVLGNSNLVSLQLHSCTALEELIIQSCESLSSLD  
 GLQLLGNLRLRLQAHR  
 LSGHGEDGRCILPQSLEELYIHEYSQETLQPCFSGNPTLLRKLHVLGNSNLVSLQLHSCTALEELIIQSCESLSSLD  
 GLQLLGNLRLRLQAHR  
 LSGHGEDGRCILPQSLEELYIHEYSQETLQPCFSGNLTLLRKLHVLGNSNLVSLQLHSCTALEELIIQSCESLSSLD  
 GLQLLGNLRLRLQAHR  
 LSGHGEDGRCILPQSLEELYIHEYSQETLQPCFSGNLTLLRKLHVLGNSNLVSLQLYSCTALEELIIQSCESLSSLD  
 GLQLLGNLRLRLQAHR  
 LSGHGEDGRCILPQSLEELYIHEYSQETLQPCFSGNLTLLRKLHVLGNSNLVSLQLHSCTALEELIIQSCESLSSLD  
 GLQLLGNLRLRLQAHR  
 LSGHGEDGRCILPQSLEELYIHEYSQETLQPCFSGNLTLLRKLHVLGNSNLVSLQLHSCTALEELIIQSCESLSSLD  
 GLQLLGNLRLRLPAHR  
 LSGHGEDGRCILPQSLEELFISEYSLETLQPCFLTNTLCKQLRVSGTTSFKSLELQSCCTALEHLKIQGCASLATLE  
 GLQFLHALRHMEVFR  
 PGLPPYLGSSSEQGYELCPRLERLDIDDPSILTTSFCKHLTSLQRLELNYCGSEVARLTDEQERALQLLTSLQELRF  
 KYCYNLIDL PAGLHSLPSLERLEIRSCRSIARLPEKGLPPSFEELDI IACSNELAQQCRTLASTLKV KINGGYVN

**Supplemental Table 1. List of PCR primers used and their applications**

| Primer    | Sequence (5' to 3')                           | Usage                                                                                                                                                                                         |
|-----------|-----------------------------------------------|-----------------------------------------------------------------------------------------------------------------------------------------------------------------------------------------------|
| 53120-F4b | AGCTATGACATGATTACGAATT<br>CAGGAAGACGGGACTGA   | Amplification of genomic regions (promoter, coding, terminator sequences) of <i>Xal</i> allelic members                                                                                       |
| 53120-R4b | AACGACGGCCAGTGCCAAGCT<br>TCAGGGAGCTCAAAGGACAG |                                                                                                                                                                                               |
| 53120-F6b | AGCTATGACATGATTACGAATT<br>CCTCGAGGGTATAGACCAT | Along with primer 53120-R4b to amplify genomic regions of <i>CGS-Xo1<sub>11</sub></i>                                                                                                         |
| BB2-F1    | TGCCACAGTTACAATCACCCA                         | Along with primer M13F to genotype transgenic plants of <i>Xal</i> allelic genes                                                                                                              |
| XaL-F1    | ATCAGGAACTTGA ACTCCAG                         | To screen <i>Xal</i> alleles in a collection of rice accessions                                                                                                                               |
| XaL-R1    | AACCACTGATTGCGGAAGG                           |                                                                                                                                                                                               |
| XaL-F2    | CCTTCGCAATCAGTGGTT                            | To amplify the LRR region of <i>Xal</i> alleles                                                                                                                                               |
| XaL-R2    | AATGTAGCAAGCGACGCACA                          |                                                                                                                                                                                               |
| Xa14L-R1  | AGGGAATCAACATAGTTAATC                         | Along with primer XaL-F1 to screen <i>Xa14</i> in a collection of rice accessions                                                                                                             |
| Cambia-F  | TGAGCGGATAACAATTCACACAG                       | Sequence the whole genomic regions of <i>Xal</i> allelic <i>R</i> genes ( <i>Xa2</i> , <i>Xa14</i> , <i>Xa31(t)</i> , <i>CGS-Xo1<sub>11</sub></i> and <i>Xa45(t)</i> ) cloned in pCAMBIA1300. |
| BB2-F2b   | ACACCCTTGTCCTCCTGCT                           |                                                                                                                                                                                               |
| Xa1-F2    | CCCTCTGCACACGCCATTGG                          |                                                                                                                                                                                               |
| Xa1upT-F  | CGTGTAACAAGTACTGACCA                          |                                                                                                                                                                                               |
| Xa14-F4   | GAGGCTATGTGCATCCTCA                           |                                                                                                                                                                                               |
| gXa1BE-R4 | CATTGTCTTAGATGATGTGT                          |                                                                                                                                                                                               |
| Xa1C-F    | TCCAGTGAGAAGTTGGAGCA                          |                                                                                                                                                                                               |
| Xa14-R4   | TGTGCACACAGGAAAGAGGA                          |                                                                                                                                                                                               |
| Xa1L-F    | TCAGGAACTTGA ACTCCAG                          |                                                                                                                                                                                               |

|           |                                                      |                                                                                                        |
|-----------|------------------------------------------------------|--------------------------------------------------------------------------------------------------------|
| Xa1L-R4   | TCGAGTGCAGTGCATGATTG                                 |                                                                                                        |
| Xa37d-R1  | ACGGTTCTGAAGGTCGTCAT                                 |                                                                                                        |
| BB2-R2    | GAAATTGGCTGATCCGAG                                   |                                                                                                        |
| M13F      | TGTAAAACGACGGCCAGT                                   |                                                                                                        |
| 86TalKDF1 | TTCGGGGAAAGTAGCACTTGA<br>G                           | Amplification of the upstream regions flanking sequences of <i>iTal3</i> and <i>iTal6</i> from PXO86   |
| 86TalKDR1 | AATATCCGGGTAGGCGCAATC<br>ACTCTACCGATGCGTGTCGTAA<br>G |                                                                                                        |
| 86TalKDF2 | AGCCTACACAATCGCTCAAGAC<br>GTACGTGAACGAACGCCTCTAC     | Amplification of the downstream regions flanking sequences of <i>iTal3</i> and <i>iTal6</i> from PXO86 |
| 86TalKDR2 | TGACCTGTTCCAGCAGAGCTTG                               |                                                                                                        |
| KD13-F    | ACGTCTTGAGCGATTGTGTAGG<br>CT                         | Amplification of kanamycin resistance gene                                                             |
| KD13-R    | AGTGATTGCGCCTACCCGGATA<br>TT                         |                                                                                                        |
| 86TAL3-F2 | CAGACGTAAACGGTCCT                                    | detection of the deletion of <i>iTal3</i> in PXO86 mutant                                              |
| 86TAL3-R2 | ACGCTGCCAGGTCGGCAACC                                 |                                                                                                        |
| 86TAL6-F2 | GCATTCAAGGAAGAGGAAA                                  | detection of the deletion of <i>iTal6</i> in PXO86 mutant                                              |
| 86TAL6-R2 | AGTGTCTACGGAACCCTG                                   |                                                                                                        |

### Supplemental Table 2. Prevalence of *Xa1* allelic *R* genes in 3k rice

In a separate Excel file.

### Supplemental Table 3. Prevalence of *Xa1* allelic *R* genes and disease reactions in 87 rice accessions.

| Rice line    | Source | Accession  | Presence of <i>Xa1</i> marker | Number of 93 aa | PXO99 <sup>A</sup> | $\Delta$ Tal3 | $\Delta$ Tal3 (piTal3a) | $\Delta$ Tal3 (piTal3b) |
|--------------|--------|------------|-------------------------------|-----------------|--------------------|---------------|-------------------------|-------------------------|
| Kitaake      |        |            | -                             |                 | S                  | S             | S                       | S                       |
| IRBB1        | IRGC   | 418736     | +                             | 6               | S                  | R             | S                       | S                       |
| IRBB2        | IRGC   |            | +                             | 5               | S                  | R             | S                       | S                       |
| Basmati      | NSGC   | Clor 12524 | +                             | 7               | S                  | R             |                         |                         |
| Chikanari 2  | NSGC   | Clor 12452 | -                             |                 |                    |               |                         |                         |
| Taichung 65  | NSGC   | PI 275428  | -                             |                 |                    |               |                         |                         |
| Toyohikari   | NSGC   | Clor 12449 | -                             |                 |                    |               |                         |                         |
| Nagate Eikou | NSGC   | Clor 12447 | -                             |                 |                    |               |                         |                         |
| Pi No. 1     | NSGC   | Clor 12445 | -                             |                 | S                  | S             | S                       | S                       |
| Somewake     | NSGC   | Clor 12423 | -                             |                 |                    |               |                         |                         |
| Shinriki 1   | NSGC   | Clor 12401 | -                             |                 |                    |               |                         |                         |
| Palman       | NSGC   | Clor 12219 | -                             |                 |                    |               |                         |                         |
| Safed        | NSGC   | Clor 12218 | -                             |                 |                    |               |                         |                         |
| Jhona        | NSGC   | Clor 12217 | -                             |                 |                    |               |                         |                         |
| Mushkan      | NSGC   | Clor 12216 | -                             |                 |                    |               |                         |                         |
| Ziri         | NSGC   | Clor 12214 | -                             |                 |                    |               |                         |                         |
| Kinai 388    | NSGC   | Clor 12199 | +                             | 6               | S                  | R             |                         |                         |
| Miyako       | NSGC   | Clor 12066 | +                             | 6               | S                  | R             |                         |                         |
| Upland       | NSGC   | Clor 12001 | +                             | 6               | S                  | R             | S                       | S                       |

|                        |      |             |   |   |   |   |   |   |
|------------------------|------|-------------|---|---|---|---|---|---|
| Kinai Early No.70      | NSGC | Clor 12197  | - |   |   |   |   |   |
| Aikoku Kinai           | NSGC | Clor 12196  | - |   |   |   |   |   |
| Vansi                  | NSGC | Clor 12222  | - |   |   |   |   |   |
| Ainaura                | NSGC | Clor 12252  | + | 6 | S | R |   |   |
| Mogamiuruti            | NSGC | Clor 12254  | + | 7 | S | R | S | S |
| Santaro                | NSGC | Clor 12285  | - |   |   |   |   |   |
| Guneki                 | NSGC | Clor 12274  | - |   |   |   |   |   |
| Schou Sung Sensho      | NSGC | Clor 12286  | - |   | S | S |   |   |
| Maratelli              | NSGC | Clor 12294  | - |   |   |   |   |   |
| Dosan 50               | NSGC | Clor 12398  | - |   |   |   |   |   |
| WC 5119                | NSGC | Clor 12399  | - |   | S | S |   |   |
| Norin 23               | NSGC | Clor 12400  | - |   |   |   |   |   |
| Shiokari               | USDA | GSOR 300031 | - |   |   |   |   |   |
| Murasaki Daikoku       | USDA | GSOR 310168 | - |   |   |   |   |   |
| P 79                   | USDA | GSOR 310380 | - |   |   |   |   |   |
| Toga                   | USDA | GSOR 310788 | + | 5 | S | R | S | S |
| Zhongyu No.6           | USDA | GSOR 311449 | - |   |   |   |   |   |
| Minghui 63             | USDA | GSOR 311461 | - |   |   |   |   |   |
| NERICA 1               | NSGC | WAB0007739  | + |   |   |   |   |   |
| NERICA 2               | NSGC | WAB0018053  | - |   |   |   |   |   |
| NERICA 3               | NSGC | WAB0037218  | - |   |   |   |   |   |
| NERICA 4               | NSGC | WAB001802   | - |   |   |   |   |   |
| NERICA 5               | NSGC | WAB0018042  | + | 5 | S | R |   |   |
| NERICA 6               | NSGC | WAB0018092  | - |   |   |   |   |   |
| NERICA 7               | NSGC | WAB0018095  | + | 6 | S | R | S | S |
| NERICA 8               | NSGC | WAB0019617  | - |   |   |   |   |   |
| NERICA 9               | NSGC | WAB0019618  | - |   |   |   |   |   |
| NERICA 10              | NSGC | WAB0019619  | - |   |   |   |   |   |
| NERICA 11              | NSGC | WAB0019620  | - |   |   |   |   |   |
| NERICA 12              | NSGC | WAB0019621  | + | 5 | S | R |   |   |
| NERICA 13              | NSGC | WAB0019622  | - |   |   |   |   |   |
| NERICA 14              | NSGC | WAB0019624  | + | 5 | S | R |   |   |
| NERICA 15              | NSGC | WAB0019623  | - |   |   |   |   |   |
| <i>O.glaberrima-1</i>  | IRGC | 100854      | - |   |   |   |   |   |
| <i>O.glaberrima-2</i>  | IRGC | 100983      | - |   |   |   |   |   |
| <i>O.glaberrima-3</i>  | IRGC | 102277      | - |   |   |   |   |   |
| <i>O.glaberrima-4</i>  | IRGC | 102500      | - |   |   |   |   |   |
| <i>O.glaberrima-5</i>  | IRGC | 103700      | - |   |   |   |   |   |
| <i>O.glaberrima-6</i>  | IRGC | 103445      | - |   |   |   |   |   |
| <i>O.glaberrima-7</i>  | IRGC | 104033      | - |   |   |   |   |   |
| <i>O.glaberrima-8</i>  | IRGC | 104200      | - |   |   |   |   |   |
| <i>O.glaberrima-9</i>  | NPGS | PI 369455   | + | 6 | S | R |   |   |
| <i>O.glaberrima-10</i> | NPGS | PI 450252   | - |   |   |   |   |   |
| <i>O.glaberrima-11</i> | NPGS | PI 450298   | + | 7 | S | R | S | S |
| <i>O.glaberrima-12</i> | NPGS | PI 450353   | - |   |   |   |   |   |
| <i>O.glaberrima-13</i> | NPGS | PI 450363   | - |   |   |   |   |   |

|                         |      |           |   |   |   |   |   |   |
|-------------------------|------|-----------|---|---|---|---|---|---|
| <i>O.glaberrima</i> -14 | NPGS | PI 450396 | - |   | S | S | S | S |
| <i>O.glaberrima</i> -15 | NPGS | PI 450438 | - |   |   |   |   |   |
| <i>O.nivara</i> -1      | IRGC | 102463    | + | 7 | S | R | S | S |
| <i>O.nivara</i> -2      | IRGC | 105722    | - |   |   |   |   |   |
| <i>O.nivara</i> -3      | IRGC | 105732    | - |   |   |   |   |   |
| <i>O.nivara</i> -4      | IRGC | 81825     | - |   |   |   |   |   |
| <i>O.barthii</i> -1     | IRGC | 100119    | - |   |   |   |   |   |
| <i>O.barthii</i> -2     | IRGC | 101248    | - |   |   |   |   |   |
| <i>O.barthii</i> -3     | IRGC | 106291    | - |   |   |   |   |   |
| <i>O.barthii</i> -4     | IRGC | 101937    | - |   |   |   |   |   |
| <i>O.officinalis</i> -1 | IRGC | 105081    | - |   |   |   |   |   |
| <i>O.officinalis</i> -2 | IRGC | 105080    | - |   |   |   |   |   |
| <i>O.officinalis</i> -3 | IRGC | 105223    | - |   |   |   |   |   |
| <i>O.officinalis</i> -4 | IRGC | 102386    | - |   |   |   |   |   |
| <i>O.officinalis</i> -5 | IRGC | 81972     | - |   |   |   |   |   |
| <i>O.officinalis</i> -6 | IRGC | 80730     | - |   |   |   |   |   |
| <i>O.minuta</i> -1      | IRGC | 101133    | - |   |   |   |   |   |
| <i>O.minuta</i> -2      | IRGC | 105132    | - |   |   |   |   |   |
| <i>O.minuta</i> -3      | IRGC | 105128    | - |   |   |   |   |   |
| <i>O.minuta</i> -4      | IRGC | 101097    | - |   |   |   |   |   |
| <i>O.rhizomatis</i> -1  | IRGC | 103421    | - |   |   |   |   |   |
| <i>O.rhizomatis</i> -2  | IRGC | 105949    | - |   |   |   |   |   |

**Supplemental Table 4. Bacterial strains used in this study**

| Strains or Plasmids                                          | Relevant characteristics                                                                                                         | Reference/Source       |
|--------------------------------------------------------------|----------------------------------------------------------------------------------------------------------------------------------|------------------------|
| <b>Strains</b>                                               |                                                                                                                                  |                        |
| <b><i>Escherichia coli</i></b>                               |                                                                                                                                  |                        |
| XL1-Blue                                                     | <i>recA1 endA1 gyrA96 thi-1 hsdR17 supE44 relA1 lac</i><br>[F' <i>proAB lacI<sup>q</sup> ZAM15 Tn10</i> (Tetr)]                  | Stratagene             |
| Trans1-T1                                                    | F- $\phi$ 80( <i>lacZ</i> ) $\Delta$ M15 $\Delta$ <i>lacX74</i> hsdR( $r_K^-$ , $m_K^+$ )<br>$\Delta$ <i>recA1398 endA1 tonA</i> | TransGen<br>Biothch    |
| <b><i>Agrobacterium tumefaciens</i></b>                      |                                                                                                                                  |                        |
| EHA105                                                       | C58 ( <i>rif<sup>R</sup></i> ) Ti pEHA105 (pTiBo542DT-DNA)<br>Succinamopine                                                      | (Hood et al.,<br>1993) |
| <b><i>Xanthomonas oryzae</i></b><br><b>pv. <i>oryzae</i></b> |                                                                                                                                  |                        |
| PXO99 <sup>A</sup>                                           | Philippine race 6                                                                                                                | This study             |
| $\Delta$ Tal3                                                | <i>iTal3a</i> and <i>iTal3b</i> knock-out mutant of PXO99 <sup>A</sup>                                                           | (Ji et al., 2016)      |
| PXO86                                                        | Philippine race 2                                                                                                                | This study             |
| PXO86 $\Delta$ iTal3                                         | iTALE A type gene knock-out mutant of PXO86                                                                                      | This study             |
| PXO86 $\Delta$ iTal6                                         | iTALE B type gene knock-out mutant of PXO86                                                                                      | This study             |
| PXO61                                                        | Philippine strain                                                                                                                | This study             |
| PXO79                                                        | Philippine strain                                                                                                                | This study             |
| PXO112                                                       | Philippine strain                                                                                                                | This study             |

|                 |                                                                               |            |
|-----------------|-------------------------------------------------------------------------------|------------|
| KXO85           | Korean strain                                                                 | This study |
| JW89011         | Korean strain                                                                 | This study |
| K202            | Korean strain                                                                 | This study |
| T7174           | Japanese strain                                                               | This study |
| H75373          | Japanese strain                                                               | This study |
| Xoo2            | Thai strain                                                                   | This study |
| A3842           | Indian strain                                                                 | This study |
| PbXO7           | Indian strain                                                                 | This study |
| IXO56           | Indonesian strain                                                             | This study |
| NXO 260         | Nepalese strain                                                               | This study |
| CIAT1185        | Colombian strain                                                              | This study |
| ZHE 173         | Chinese strain                                                                | This study |
| C1              | Chinese strain                                                                | This study |
| GD1358          | Chinese strain                                                                | This study |
| HB21            | Chinese strain                                                                | This study |
| Aust-2013       | Australian strain                                                             | This study |
| Aust-R3         | Australian strain                                                             | This study |
| AXO1947         | Cameroon strain                                                               | This study |
|                 |                                                                               |            |
| <b>Plasmids</b> |                                                                               |            |
| pCAMBIA1300     | Binary T-DNA vector for rice transformation                                   | CAMBIA     |
| piTal3a         | pHM1 expressing <i>iTal3a</i> under <i>lacZ</i> promoter with FLAG in pZW     | This study |
| piTal3b         | pHM1 expressing <i>iTal3b</i> under <i>lacZ</i> promoter with FLAG tag in pZW | This study |
| piTal3aFb       | <i>iTal3a</i> variant containing <i>iTal3b</i> C-terminus in pHZW             | This study |
| piTal3bFa       | <i>iTal3b</i> variant containing <i>iTal3a</i> C-terminus in pHZW             | This study |

Hood, E.E., Gelvin, S.B., Melchers, L.S., and Hoekema, A. (1993). New *Agrobacterium* helper plasmids for gene transfer to plants. *Transgenic research* 2:208-218.

Ji, Z., Ji, C., Liu, B., Zou, L., Chen, G., and Yang, B. (2016). Interfering TAL effectors of *Xanthomonas oryzae* neutralize *R*-gene-mediated plant disease resistance. *Nature communications* 7:13435.

**Supplemental Table 5. Prevalence of iTALE genes in Xoo and Xoc genomes.**

In a separate Excel file.
