# Supplementary material for: Xa1 Allelic R Genes Activate Rice Blight Resistance Suppressed by Interfering TAL Effectors
Source: PubMed Central journal article supplement — Plant Commun. 2020 Jun 20;1(4):100087. doi: 10.1016/j.xplc.2020.100087 (PMC7748017; doi:10.1016/j.xplc.2020.100087), 2020-06-20
Supplement: mmc4.pdf [file mmc4.pdf]

# *Xa1* Allelic *R* Genes Activate Rice Blight Resistance Suppressed by Interfering TAL Effectors

Chonghui Ji<sup>1,6</sup>, Zhiyuan Ji<sup>2,3,6</sup>, Bo Liu<sup>1</sup>, He Cheng<sup>4</sup>, Hua Liu<sup>1</sup>, Sanzhen Liu<sup>4</sup>, Bing Yang<sup>1,5,\*</sup> and Gongyou Chen<sup>2,\*</sup>

<sup>1</sup>Division of Plant Sciences, C. Bond Life Science Center, University of Missouri, Columbia, MO 65211, USA

<sup>2</sup>School of Agriculture and Biology/State Key Laboratory of Microbial Metabolism, Shanghai Jiao Tong University, Shanghai 200240, P.R. China

<sup>3</sup>National Key Facility for Crop Gene Resources and Genetic Improvement (NFCRI), Institute of Crop Sciences, Chinese Academy of Agricultural Sciences, Beijing 100081, P.R. China

<sup>4</sup>Department of Plant Pathology, Kansas State University, Manhattan, KS 66506, USA

<sup>5</sup>Donald Danforth Plant Science Center, St. Louis, MO 63132, USA

<sup>6</sup>These authors contributed equally to this article.

\*Correspondence: Bing Yang ([yangbi@missouri.edu](mailto:yangbi@missouri.edu)), Gongyou Chen ([gyouchen@sjtu.edu.cn](mailto:gyouchen@sjtu.edu.cn))

<https://doi.org/10.1016/j.xplc.2020.100087>

## ABSTRACT

*Xanthomonas oryzae* pathovar *oryzae* (*Xoo*) uses transcription activator-like effectors (TALEs) to cause bacterial blight (BB) in rice. In turn, rice has evolved several mechanisms to resist BB by targeting TALEs. One mechanism involves the nucleotide-binding leucine-rich repeat (NLR) resistance gene *Xa1* and TALEs. Reciprocally, *Xoo* has evolved TALE variants, C-terminally truncated versions (interfering TALEs or iTALEs), to overcome *Xa1* resistance. However, it remains unknown to what extent the two co-adaptive mechanisms mediate *Xoo*–rice interactions. In this study, we cloned and characterized five additional *Xa1* allelic *R* genes, *Xa2*, *Xa31(t)*, *Xa14*, *CGS-Xo1<sub>11</sub>*, and *Xa45(t)* from a collection of rice accessions. Sequence analysis revealed that *Xa2* and *Xa31(t)* from different rice cultivars are identical. These genes and their predicted proteins were found to be highly conserved, forming a group of *Xa1* alleles. The *XA1* alleles could be distinguished by the number of C-terminal tandem repeats consisting of 93 amino acid residues and ranged from four in *XA14* to seven in *XA45(t)*. *Xa1* allelic genes were identified in the 3000 rice genomes surveyed. On the other hand, iTALEs could suppress the resistance mediated by *Xa1* allelic *R* genes, and iTALE genes were prevalent (~95%) in Asian, but not in African *Xoo* strains. Our findings demonstrate the prominence of a defense mechanism in which rice depends on *Xa1* alleles and a counteracting mechanism in which *Xoo* relies on iTALEs for BB.

**Keywords:** *Xa2*, *Xa14*, *Xa45(t)*, TAL effector, iTAL effector, bacterial blight

**Ji C., Ji Z., Liu B., Cheng H., Liu H., Liu S., Yang B., and Chen G. (2020).** *Xa1* Allelic *R* Genes Activate Rice Blight Resistance Suppressed by Interfering TAL Effectors. *Plant Comm.* **1**, 100087.

## INTRODUCTION

Major food crops suffer significant yield losses to an average of 20% due to damage caused by pathogens and pests (Savary et al., 2019). To ward off infections caused by microbial pathogens, host plants depend on defense responses that are induced upon the recognition of pathogen-derived molecules by plant immune receptors. The receptors are either intracellular nucleotide-binding leucine-rich repeat receptor proteins (NLRs) or plasma membrane-bound receptor proteins. NLRs recognize effectors inside plant cells that are delivered by pathogens, whereas membrane immune receptors recognize a wide range

of extracellular pathogen-derived signals at the plant–pathogen interface (Boller and Felix, 2009; Cook et al., 2015; Monteiro and Nishimura, 2018). The extracellular signals include general pathogen-associated molecular patterns or compounds released from plant cells during infection, and the recognition by membrane immune receptors activates basic and broad immunity to plants. To establish successful infections,

Published by the Plant Communications Shanghai Editorial Office in association with Cell Press, an imprint of Elsevier Inc., on behalf of CSPB and IPPE, CAS.

## Plant Communications

pathogens have evolved a diverse repertoire of effectors that are delivered into plant cells to interfere with immunity by acting as virulence factors. However, these effectors can be recognized by NLRs and the recognition triggers effector-specific immunity, including the hypersensitive response (HR) at the infection site (Boller and Felix, 2009; Cook et al., 2015). Pathogens can also use virulence mechanisms to prepare the host for pathogen infection by evading or suppressing the effector triggered immunity (Jackson et al., 1999; Feng and Zhou, 2012).

Bacterial blight (BB), caused by *Xanthomonas oryzae* pathovar *oryzae* (*Xoo*), is one of the most important diseases in rice. BB also provides a well-established model for studying host-microbe interactions (Niño-Liu et al., 2006). *Xoo* causes blight disease by colonizing and spreading along the vascular tissue of rice leaves, causing severe yield loss and damaging grain quality (Mew et al., 1993; Niño-Liu et al., 2006). Host resistance bestowed by genetically inheritable *R* genes is one of the most economically and environmentally sustainable approaches to control diseases, other than the use of chemicals and antibiotics (White and Yang, 2009). Forty-four *R* genes for BB have been identified, and several have been cloned and characterized (He et al., 2012; Triplett et al., 2016; Dilla-Ermita et al., 2017; Kim, 2018). The cloned *R* genes for BB can be classified into five groups based on their structural characteristics and mechanisms of action. They are receptor-like kinase genes (e.g., *Xa21*), NLR genes (e.g., *Xa1*), executor genes (e.g., *Xa27*), recessive *R* genes derived from the sugar transporter *SWEET* genes (e.g., *xa13*), and a variant of the transcription factor gamma subunit gene (*xa5*) (Song et al., 1995; Yoshimura et al., 1998; Iyer and McCouch, 2004; Gu et al., 2005; Chu et al., 2006). Unfortunately, an increasing number of *R* genes, such as *Xa10*, *Xa4*, and *Xa21*, when used as single major BB-resistant genes in rice breeding, were defeated in fields due to the rapidly emerging virulent strains of *Xoo* (Adhikari et al., 1999; Lee et al., 1999; Vera Cruz et al., 2000). Altering *R* gene recognizable avirulence (*avr*) genes and recruiting new virulence factors or resistance suppressors are two common mechanisms used by *Xoo* to evade and counteract rice immunity (Jiang et al., 2020).

Transcription activator-like effectors (TALEs), from *Xanthomonas* and *Ralstonia* bacteria, comprise the largest family of type III effector proteins in bacteria. TALEs are highly conserved and differ from each other by the number of central 34-amino acid (aa) repeats and the composition of two amino acids at positions 12 and 13 of each repeat, two unique features that determine the specificity of DNA binding to the promoters of host target genes (Boch et al., 2009; Moscou and Bogdanove, 2009). In addition, the C termini of TALEs contain nuclear localization signals and transcription activation domains, characteristic of eukaryotic transcription activators. A group of atypical TALE variants lacking C-terminal transcription activation domains, the so-called iTALEs (interfering TALEs [Ji et al., 2016]) or truncTALEs (truncated TALEs [Read et al., 2016]) have been identified. iTALEs exist in two forms; type A iTALEs are characterized by the C-terminal truncation of 103 aa due to a premature stop codon introduced by a C-to-T change in the coding sequence of the genes, whereas type B iTALEs are characterized by a loss of 229 aa and an addition of 10 aa due to a large deletion and frameshift of the coding sequence at the 3' end of the genes (Salzberg et al., 2008; Ji et al., 2016; Read et al., 2016).

## *Xa1* Allelic *R* Genes Activate Rice Blight Resistance

Members of the NLR superfamily, the critical components of the innate immune system in plants and animals, can detect a variety of microbial pathogens and protect hosts from the threat of disease (Jones et al., 2016; Benthams et al., 2017). *Xa1* is the only cloned NLR gene against BB from rice, and it can confer race-specific resistance to certain *Xoo* strains (Yoshimura et al., 1998). *Xa1* resistance is triggered by TALEs but suppressed by iTALEs (Ji et al., 2016), resulting in race specificity that is determined by the presence or absence of both TALEs and iTALEs, particularly in the *Xoo* strain (Ji et al., 2016). *Xa1* plants, including transgenic rice plants expressing *Xa1*, were resistant to *Xoo* strains lacking iTALE genes (e.g.,  $\Delta$ Tal3, a mutant of PXO99<sup>A</sup> with its iTALE genes inactivated), and resistance was suppressed in the presence of *iTal3a* or *iTal3b* (Ji et al., 2016). Resistance responses include the HR (brown coloring at the inoculation site). Similar to *Xa1*, *Xo1*, which has not yet been cloned, in the Carolina Gold Select (CGS) rice variety was shown to confer resistance against several African *Xoc* (*Xanthomonas oryzae* pathovar *oryzicola*) strains in a TALE-dependent manner, and resistance was suppressed by truncated TALEs (Read et al., 2016; Triplett et al., 2016). It has been reported that *Xo1* in CGS is located within a region harboring 14 NLR *R* genes, and hypothesized that one of them (CGS-*Xo1*<sub>11</sub>, allelic to *Xa1*) might be *Xo1* (Read et al., 2020).

The main feature of the predicted protein encoded by *Xa1* includes six nearly identical leucine-rich repeats at the C terminus, and the leucine-rich repeat (LRR) region is hypothesized to function in pathogenic molecule recognition and protein-protein interactions. It has been reported that all TALEs are the avirulent triggers for *Xa1* resistance, and they are widely present in *Xanthomonas* strains (Ji et al., 2016). iTALEs, probably the evolutionary derivatives of TALEs, share unique and conserved functional protein structures, namely two internal deletions at the N terminus and the lack of transcription activation domains at the C terminus. However, further studies are needed to determine how XA1 recognizes TALEs to initiate resistance and how iTALEs suppress *Xa1* resistance to *Xoo* in rice (Zuluaga et al., 2017).

We previously reported that *Xa1* is a broad-spectrum *R* gene that recognizes TALEs independent of the TALE central repeat regions. However, the function of this presumably excellent *R* gene was masked by iTALEs (Ji et al., 2016). In this study, we report the cloning of *Xa1* allelic genes from different rice varieties and show that they have high variations at their C termini, mainly in the LRR regions. Surprisingly, iTALEs have different suppression profiles compared with *Xa1* allelic *R* genes. Although the resistance of *Xa1* *R* alleles can be defeated by new virulence factors, an investigation into the structural and resistance features of *Xa1* *R* alleles can help us to understand the resistance mechanism and suppression basis of iTALEs, and potentially help us to engineer new *R* genes for an expanded spectrum of BB resistance.

## RESULTS

### Four Rice Varieties, Each with an *R* Gene, Display a Resistance Spectrum Similar to *Xa1*

Previous studies have mapped *Xa2* in IRBB2 (He et al., 2006), *Xa14* in IRBB14 (Bao et al., 2010), *Xa31(t)* in Zhachanglong

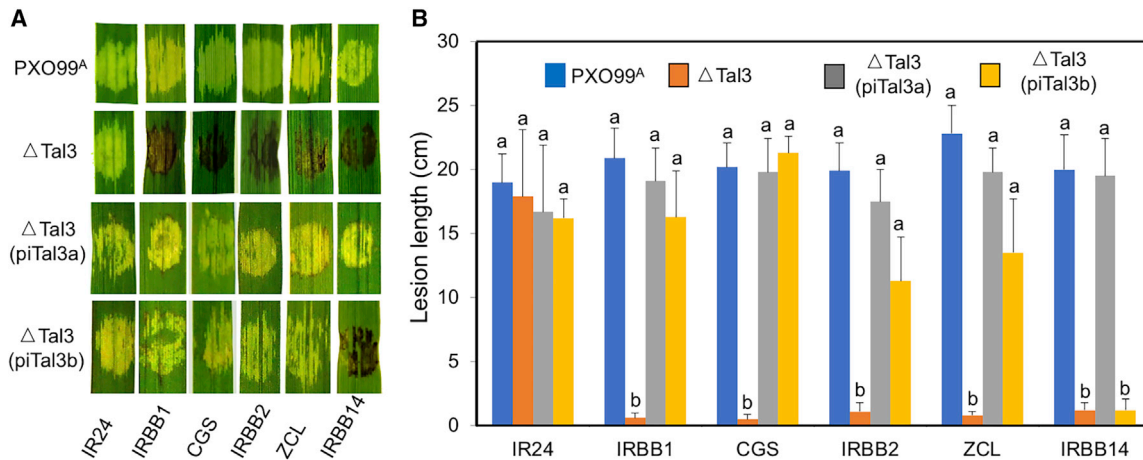

**Figure 1. Several Rice Varieties Show Disease (Resistant or Susceptible) Responses to *Xoo* Strains Lacking or Carrying iTALE Genes.**

**(A)** Hypersensitive responses (dark brown inoculation spots) or water soaking symptoms (clear inoculation spots) in different rice varieties. CGS, Carolina Gold Select; ZCL, Zhachanglong.

**(B)** Lesion length measurements of different rice varieties infected with *Xoo* strains as indicated. Error bars indicate standard deviations. Identical lower-case letters indicate no significant difference ( $p < 0.01$ ). The experiments were repeated three times with similar results.

(ZCL) (Wang et al., 2009), and *Xo1* in CGS (Triplett et al., 2016) within the regions corresponding to the *Xa1* locus in IRBB1. We asked whether these loci, in which all four respective *R* genes have not yet been cloned, could confer disease responses similar or different from that of *Xa1*, i.e., susceptible to PXO99<sup>A</sup> and resistant to its mutant strain  $\Delta$ Tal3. As shown in Figure 1 and Table 1, rice varieties (IRBB2, CGS, ZCL, and IRBB14), such as IRBB1, were resistant to  $\Delta$ Tal3 and susceptible to PXO99<sup>A</sup> in terms of the HR and lesion length. Except for IRBB14, their resistance to  $\Delta$ Tal3 could be suppressed by the introduction of *iTal3a* or *iTal3b*. Their resistance spectra were also examined with an additional 24 *Xoo* isolates that contained different iTALE genes as confirmed by PCR with iTALE gene-specific primers and the analysis of their available genome sequences. Five *Xoo* strains (KXO85, JW89011, T7174, Aust-2013, and Aust-R3) were avirulent to the five rice varieties (IRBB1, IRBB2, CGS, ZCL, and IRBB14), whereas a PXO86 mutant containing only a type B iTALE gene and PXO112 were incompatible with IRBB14. The African strain AXO1947, which contains no known iTALE gene, was avirulent to IRBB1 and CGS, but virulent to three rice varieties (IRBB2, ZCL, and IRBB14). The remaining *Xoo* strains were virulent to the five varieties, which exhibited a susceptible phenotype, such as IR24, a rice variety that contained no known dominant *R* gene and served as a control (Table 1). These findings indicate that the four rice varieties are similar to IRBB1 (*Xa1*) in response to TALE- and iTALE-containing *Xoo* strains, except for IRBB14 (*Xa14*).

### *Xa2*, *Xa31(t)*, *CGS-Xo1<sub>11</sub>*, and *Xa14* Confer *Xa1*-like Resistance

We hypothesized that the *R* genes in the four tested rice varieties that conferred resistance to  $\Delta$ Tal3 and susceptibility to PXO99<sup>A</sup> were allelic to *Xa1*. To test this hypothesis, we PCR-amplified the respective genomic fragments from IRBB2, IRBB14, and ZCL using primers 53120-F4b and 53120-R4b, and from CGS, we used 53120-F6b as the forward primer, which was specific to both *Xa1* in IRBB1 and *xa1* in Nipponbare, and 53120-R4b

as the reverse primer (see sequence information in Supplemental Table 1). The individual genomic fragments were sequenced and used to transform Kitaake, a *japonica* variety susceptible to most *Xoo* strains (Oliva et al., 2019). The transgenic T0 plants, as long as they were positive for transgenes as verified by PCR, were resistant to  $\Delta$ Tal3, with the lesion length ranging from 0.1 to 0.7 cm, whereas the wild-type control and transgene-negative lines were susceptible to  $\Delta$ Tal3, with the lesion length ranging from 11.3 to 14.7 cm (Supplemental Figure 1). Similar results were obtained by the segregation analysis of transgenes and resistance phenotypes in selected T1 and T2 families derived from more than two independent resistant T0 plants. The transgenic plants also showed resistance or susceptibility to the 26 *Xoo* strains, similar to their donor rice (Table 1). These results demonstrate that the genes from these four rice varieties are allelic to *Xa1* and function similar to *Xa1*, in that they are resistant to *Xoo* strains lacking iTALE genes.

### *Xa1*, *Xa2*, *Xa31(t)*, *CGS-Xo1<sub>11</sub>*, and *Xa14* Form a Group of *Xa1* Allelic *R* Genes

We then analyzed the sequences derived from the genomic clones that complemented Kitaake with resistance to  $\Delta$ Tal3. The clone from IRBB2 contained 8997 nucleotides with a predicted gene structure similar to that of *Xa1*, consisting of two introns and three exons. The predicted amino acid sequences of XA2 consisted of an N-terminal zinc finger BED (zFBED) domain, an NB-ARC domain, and strikingly, the C-terminal, a highly conserved tandem repeat of 93-aa residues within the LRR region (Supplemental Figure 2). XA2 had five 93-aa repeats, whereas XA1 contained six 93-aa repeats (Figure 2). In addition to the repeat regions, the remaining 1244 aa were identical between XA2 and XA1 (Supplemental Figure 2). By comparison, *Xa31(t)* encoded a protein almost identical to XA2 (with only a 1-aa difference in the entire 1709-aa predicted protein), including the five 93-aa tandem repeats. In addition, the CGS clone contained a gene encoding five 93-aa repeats. It was 99.6% identical to

| Xoo strain         | iTALE type A | iTALE type B | IR24 | IRBB1 | CGS | IRBB2 | ZCL | IRBB14 | Kit | Kit-Xa1 | Kit-CGS-Xo1 <sub>11</sub> | Kit-Xa2 | Kit-Xa31(t) | Kit-Xa14 |
|--------------------|--------------|--------------|------|-------|-----|-------|-----|--------|-----|---------|---------------------------|---------|-------------|----------|
| PXO99 <sup>A</sup> | +            | +            | S    | S     | S   | S     | S   | S      | S   | S       | S                         | S       | S           | S        |
| ΔTal3              | –            | –            | S    | R     | R   | R     | R   | R      | S   | R       | R                         | R       | R           | R        |
| ΔTal3/iTAL3a       | +            | –            | S    | S     | S   | S     | S   | S      | S   | S       | S                         | S       | S           | S        |
| ΔTal3/iTAL3b       | –            | +            | S    | S     | S   | S     | S   | R      | S   | S       | S                         | S       | S           | R        |
| PXO86              | +            | +            | S    | S     | S   | S     | S   | S      | S   | S       | S                         | S       | S           | S        |
| PXO83ΔTal3         | –            | +            | S    | S     | S   | S     | S   | R      | S   | S       | S                         | S       | S           | R        |
| PXO83ΔTal6         | +            | –            | S    | S     | S   | S     | S   | S      | S   | S       | S                         | S       | S           | S        |
| PXO61              | +            | +            | S    | S     | S   | S     | S   | S      | S   | S       | S                         | S       | S           | S        |
| PXO79              | +            | +            | S    | S     | S   | S     | S   | S      | S   | S       | S                         | S       | S           | S        |
| PXO112             | –            | +            | S    | S     | S   | S     | S   | R      | S   | S       | S                         | S       | S           | S        |
| KXO85              | –            | –            | S    | R     | R   | R     | R   | R      | S   | R       | R                         | R       | R           | R        |
| JW89011            | –            | +            | S    | R     | R   | R     | R   | R      | S   | R       | R                         | R       | R           | R        |
| K202               | +            | +            | S    | S     | S   | S     | S   | S      | S   | S       | S                         | S       | S           | S        |
| T7174              | –            | +            | S    | R     | R   | R     | R   | R      | S   | R       | R                         | R       | R           | R        |
| H75373             | +            | +            | S    | S     | S   | S     | S   | S      | S   | S       | S                         | S       | S           | S        |
| Xoo2               | +            | –            | S    | S     | S   | S     | S   | S      | S   | S       | S                         | S       | S           | S        |
| A3842              | +            | +            | S    | S     | S   | S     | S   | S      | S   | S       | S                         | S       | S           | S        |
| PbXo7              | +            | –            | S    | S     | S   | S     | S   | S      | S   | S       | S                         | S       | S           | S        |
| IXO56              | +            | +            | S    | S     | S   | S     | S   | S      | S   | S       | S                         | S       | S           | S        |
| NXO260             | +            | +            | S    | S     | S   | S     | S   | S      | S   | S       | S                         | S       | S           | S        |
| CIAT1185           | +            | +            | S    | S     | S   | S     | S   | S      | S   | S       | S                         | S       | S           | S        |
| ZHE173             | +            | –            | S    | S     | S   | S     | S   | S      | S   | S       | S                         | S       | S           | S        |
| C1                 | –            | +            | S    | S     | S   | S     | S   | S      | S   | S       | S                         | S       | S           | S        |
| GD1358             | +            | +            | S    | S     | S   | S     | S   | S      | S   | S       | S                         | S       | S           | S        |
| HB21               | –            | +            | S    | S     | S   | S     | S   | S      | S   | S       | S                         | S       | S           | S        |
| Aust-2013          | –            | +            | S    | R     | R   | R     | R   | R      | S   | R       | R                         | R       | R           | R        |
| Aust-R3            | –            | +            | S    | R     | R   | R     | R   | R      | S   | R       | R                         | R       | R           | R        |
| AXO1947            | –            | –            | S    | R     | R   | S     | S   | S      | S   | R       | R                         | S       | S           | S        |

**Table 1. Disease Spectrum of Cultivars and Transgenic Plants Containing the Genomic Clones of Xa1 Allelic R Genes.**

Note: CGS, Carolina Gold Select; ZCL, Zachanglong; Kit, Kitaake. The disease scores were determined by lesion length, followed by leaf tip clipping. R represents the disease reaction with a lesion length shorter than 5 cm, whereas S indicates the reaction with a lesion length longer than 5 cm (usually longer than 10 cm).

Xa2 and 99.2% identical to XA2, and very similar to CGS-Xo1<sub>11</sub> as reported by Read et al. (2020). Our CGS-Xo1<sub>11</sub> differed from that of Read et al., 2020 in 17 nucleotides, which corresponded to 7 aa all occurring within the repeat region, probably due to sequencing errors. For example, the CGS-Xo1<sub>11</sub> of Read et al., 2020 had a frameshift “A” deletion at position 78 in the fourth repeat. Due to the high similarity, we refer to the gene in our genomic clone as CGS-Xo1<sub>11</sub> (Supplemental Figure 2). It is obvious that Xa2 and Xa31(t) are identical, whereas CGS-Xo1<sub>11</sub> is not. Furthermore, Xa14 encodes a protein that is slightly different from XA1 in terms of structure (Figure 2). XA14 contains an imperfect first repeat of 135 aa, followed by three 93-aa repeats. Beyond their repeat regions, XA14 and XA1 are 96% (1199/1245 aa) identical (Supplemental Figure 2).

### Prevalence of Xa1 Allelic R Genes in Rice

Based on the conserved sequences between xa1 (susceptible) and Xa1 (resistant) alleles in the database, as well as our newly cloned Xa1 allelic R genes, the significant difference between the resistant and susceptible alleles was an insertion of 1305 bp preceding the first 279-bp (for 93-aa) repeat in xa1 (Figure 2C). We therefore chose a 36-bp sequence (5'-tctctgccaccttccgca/atcagtggtatggagaa-3') that spanned the junction of the first 279-bp repeat and its preceding region as the feature sequence for the functional Xa1 allelic R genes. The 36-bp feature sequence was used to scan 3000 rice genome sequences to identify rice accessions that contained the feature sequence. A total of 463 accessions were found to contain at least ten reads with perfect

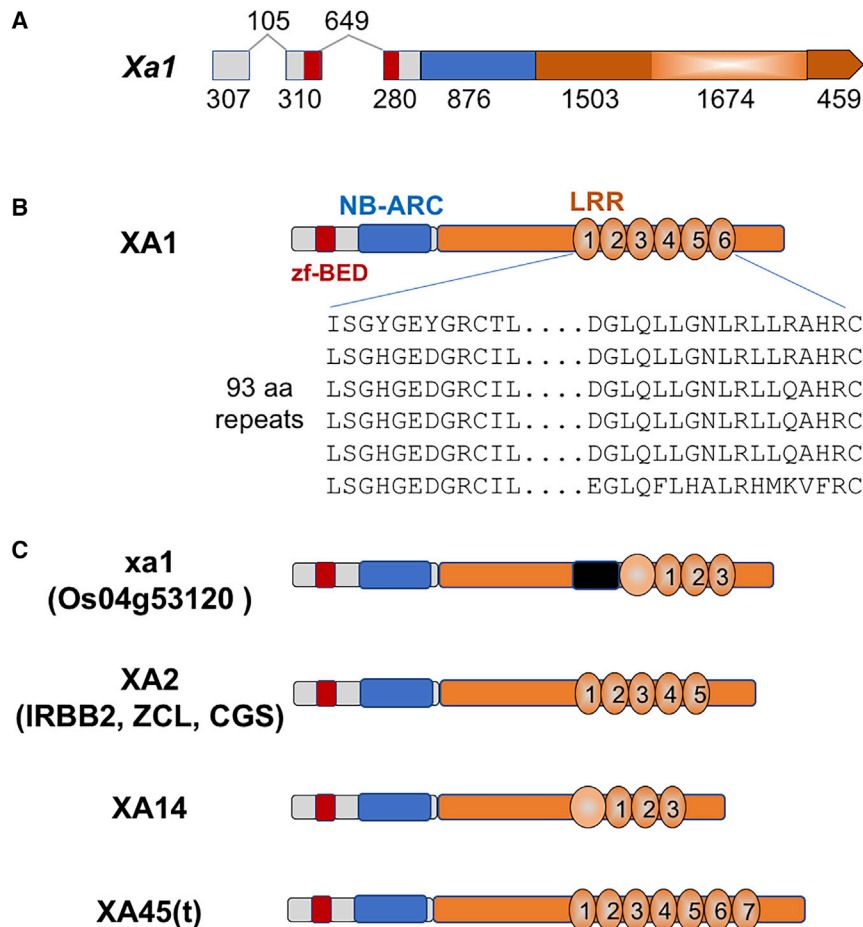

matches to the feature sequence, suggesting that approximately 15.4% of the accessions contained functional *Xa1* allelic *R* genes. There were 994 (33.1%) accessions that contained *Xa1* alleles, that is, if the reads of the matches were extended to include at least one hit (Supplemental Table 2).

We next screened our collection of rice accessions using a PCR approach with two pairs of primers that specifically detect the presence of the *Xa1* feature sequence (XaL-F1 and XaL-R1). We also determined the number of repeat sequences (XaL-F2 and XaL-R2) (Figure 3A). As shown in Supplemental Table 3, 16 out of 87 accessions were positive for the *Xa1* signature sequence. Among them, the repeats ranged from four to seven, with the majority of accessions having five or six repeats (Figure 3B). To determine whether alleles confer BB resistance similar to *Xa1*, 22 accessions, including several accessions lacking the *Xa1* signature sequence, were inoculated with PXO99<sup>A</sup>,  $\Delta$ Tal3, and the complemented strains of  $\Delta$ Tal3 with either *iTal3a* or *iTal3b*. Indeed, accessions that contained *Xa1* allelic genes exhibited the HR phenotype in response to  $\Delta$ Tal3, and the disease phenotype (water soaking) after the inoculation of both PXO99<sup>A</sup> and  $\Delta$ Tal3 with either *iTal3a* or *iTal3b* (Figure 3C and 3D and Supplemental Table 3), indicating that the resistance by *Xa1* allelic *R* genes was specifically suppressed by iTALEs.

To further confirm whether the gene predicted to encode the seven 93-aa LRR repeats was indeed functional, the genomic fragment

**Figure 2. Gene and Protein Domain Structures of XA1 Allelic Members.**

**(A)** *Xa1* consists of three exons (bars) and two introns (lines). Sequences encoding zf-BED, NB-ARC, and LRR are denoted as red, blue, and orange bars, respectively. Nucleotide numbers are shown below the bars or above the lines.

**(B)** Domains of XA1 are presented as zf-BED, NB-ARC, and LRR. Partial sequences of 99 amino acids are denoted below the numbered circles.

**(C)** Domains of XA1 alleles similar to XA1 are presented. *xa1* from Nipponbare contains a sequence (black bar) upstream of the first imperfect repeat.

was PCR-amplified with 53120-F4b and 53120-R4b from one accession (*Oryza nivara*-1, IRGC 102463), similar to the approach used to clone the other *Xa1* allelic genes. The genomic clone in pCAMBIA1300 was introduced into Kitaake and the primary transgenic plants were assessed for resistance. As expected, the transgenic plants (T0 and T1 generations) that were positive for the transgene were resistant to  $\Delta$ Tal3 but susceptible to PXO99<sup>A</sup> (Figure 4). The genomic clone was Sanger sequenced and found to contain a gene allelic to *Xa1* (Supplemental Figure 2). We named the new gene *Xa45(t)*.

### Prevalence of iTALE Genes in *Xanthomonas oryzae* Pathovars

The wide spread of *Xa1* allelic *R* genes in nature might create significant selection pressure for the adaptation of *Xanthomonas oryzae* (*Xo*) pathogens, particularly *Xoo* populations in rice fields. It is believed that cognate iTALE genes exist in the two *Xo* pathovars. To survey the prevalence of iTALE genes among *Xo* isolates that represent the geographic and genetic relatedness of the pathogens (Oliva et al., 2019), we surveyed the database for the presence of iTALE genes among the *Xo* genome sequences deposited in NCBI (<https://www.ncbi.nlm.nih.gov>, Supplemental Table 5 for a list of strains with a prevalence of iTALE genes). Out of 42 *Xoo* strains from Asia and Australia, 40 (~95%) strains contained type A, type B, or both types of iTALE genes, whereas none of the 33 African *Xoo* genomes contained iTALE genes (Supplemental Table 5). On the other hand, ten (100%) *Xoc* genomes from Asia contained either type B or both A and B iTALE genes, whereas two out of three African *Xoc* strains contained type B iTALE genes (Supplemental Table 5). These findings reveal the prevalence of both *Xa1* allelic *R* genes in Asian rice and iTALE genes in *Xanthomonas oryzae* populations in Asia, as well as the co-adaptation of pathogens and host plants in BB and leaf streak diseases in Asia.

## DISCUSSION

In this study, we identified several rice varieties that were resistant to the *Xoo* strain ( $\Delta$ Tal3) lacking iTALE genes, and the resistance was suppressed by *Xoo* strains carrying

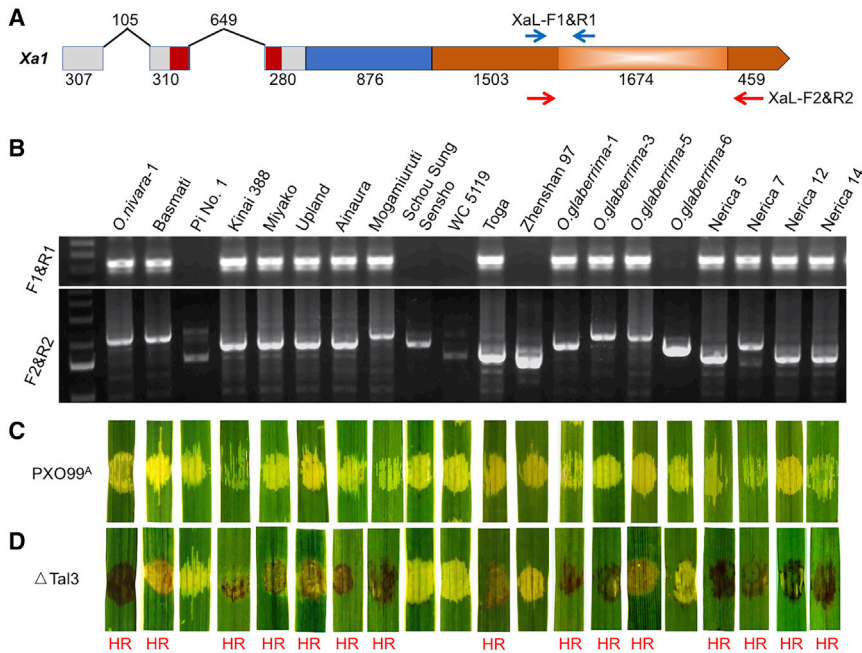

**Figure 3. Prevalence of Xa1 Allelic Genes in Representative Rice Accessions.**

**(A)** Gene structure of Xa1 in which two pairs of primers were used to detect the signature sequences of Xa1 alleles in 20 rice varieties.

**(B)** Gel images of PCR amplicons of the junction of the first repeat of 279 nucleotides and its upstream region derived from primers XaL-F1 and XaL-R1 (upper panel), as well as the whole repeat region derived from primers XaL-F2 and XaL-R2 (lower panel).

**(C)** Water soaking (susceptible) phenotypes of 20 rice varieties in response to PXO99<sup>A</sup> inoculation through the syringe infiltration of leaves.

**(D)** Hypersensitive reaction (HR) and water soaking phenotypes of 20 rice varieties in response to ΔTal3 inoculation through the syringe infiltration of leaves.

iTALE genes. The resistance was mediated by several previously identified but as-yet uncloned R genes allelic to Xa1. These genes are highly conserved on both nucleotide and predicted amino acid levels, and the most distinguishable feature is the variable repeat number of the C-terminal 93-aa residues, with the repeats ranging from four in XA14 to seven in XA45(t). Based on the signature sequence of Xa1 allelic members, a search of 3000 rice genome sequences revealed that approximately 15% of the accessions contained the Xa1 allelic R genes. Reciprocally, most Asian Xoo and Xoc strains (>95%) contained iTALE genes, probably due to co-adaptation or arms races between the host plant and its pathogens.

The cloning of a gene usually involves mapping of the gene and functional complementation of the lines otherwise lacking the gene or the functional allele. For Xa2, Xa31(t), and Xa14, all three R genes were mapped in their respective donors within the regions, wherein Xa1 in IRBB1 was cloned (He et al., 2006; Wang et al., 2009; Bao et al., 2010). The transgenic Kitaake plants containing putative Xa2, Xa31(t), and Xa14 genomic clones were resistant to Xoo strains lacking iTALEs and were susceptible to Xoo strains carrying iTALE genes. The phenotypes of resistance and susceptibility of the transgenic plants to the tested Xoo strains were identical to the donors, IRBB2, Zhachanglong, and IRBB14, respectively. These data evidence the functional identities of the three R genes. As Xa2 and Xa31(t) are identical, we refer to them as Xa2. However, it remains to be determined whether CGS-Xo1<sub>11</sub> is Xo1, which confers resistance to Xoc. We currently do not have the avirulent Xoc strains used by Triplett et al. (2016) to determine the Xoc resistance spectrum of the Kitaake CGS-Xo1<sub>11</sub> transgenic plants. However, CGS-Xo1<sub>11</sub> is at least an NLR gene resistant to Xoo, which is supported by the notion that the Kitaake transgenic plants with CGS-Xo1<sub>11</sub> had the same resistance spectrum against the tested Xoo strains as the donor CGS.

features of the zfBED domain flanked by two nuclear localization signals and variable 93-aa tandem repeats in the LRR region. The XA1 allelic members are highly conserved and can be distinguished by the number of 93-aa repeats. It remains to be determined whether repeat number plays a role in the functionality and specificity of the members. It is also unknown whether the 93-aa repeats play a role in the recognition of TALEs for the initiation of resistance to BB. As TALEs and iTALEs contain variable numbers of 34-aa repeats, it is reasonable to speculate that there are physical interactions between XA1 allelic members and TALEs for resistance and the interference of the interaction by iTALEs as a decoy for susceptibility.

The prevalence of both Xa1 allelic R genes in rice and TALE genes in Xoo creates an extraordinary challenge for Xoo to proliferate in rice, which is the only known host. Therefore, it is important to further investigate the prevalence of iTALE genes in Xoo, particularly in Asia where conditions are more conducive to BB and where epidemics of blight disease frequently occur (Niño-Liu et al., 2006). To understand how iTALEs interfere with the resistance activated by the recognition of TALEs by Xa1 or its allelic members will provide the basis for the production of broad-spectrum resistance against iTALE-containing Xoo pathogens and mitigate the yield loss caused by the pathogens in rice.

**METHODS**

**Plant Materials, Bacterial Strains, Medium, and Growth Conditions**

The seeds of several rice varieties (Supplemental Table 3) used in this research were kindly provided by the International Rice Research Institute and the U.S. National Small Grains Collection.

All plants were grown in a greenhouse and growth chamber at 30°C with a 12-h light period and at 28°C with a 12-h dark period and relative humidity of 60%–75%. Escherichia coli strains were grown in Luria-Bertani medium supplemented with appropriate antibiotics at 37°C. Agrobacterium

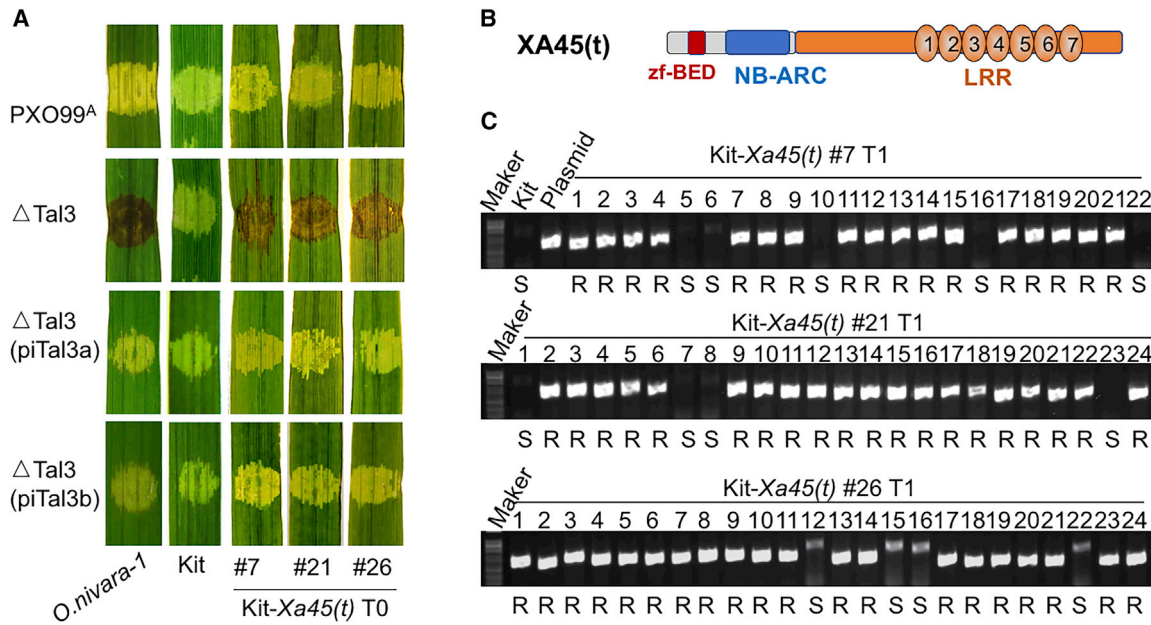

**Figure 4. Functional Complementation of *Xa45(t)*.**

**(A)** Three transgenic Kitaake (Kit) lines of the first generation (T0) in response to the inoculation of different *Xoo* strains as indicated on the left side of each panel. The hypersensitive response (dark brown inoculation spots) or water soaking (clear inoculation spots) symptoms were scored 3 days after inoculation.

**(B)** Predicted domains of *Xa45(t)* as indicated by zf-BED, NB-ARC, and LRR with seven 93-aa repeats.

**(C)** Association of genotypes and phenotypes of *Xa45(t)* transgenic Kitaake plants in the T1 generation. Gel images of PCR amplicons specific for *Xa45(t)* of individual progeny plants from three lines. Disease reactions are characterized as “S” for susceptibility to bacterial infection when lesion lengths were >10 cm and “R” for resistance when lesion lengths were <5 cm 12 days after leaf tip clipping inoculation with  $\Delta$ Tal3.

*tumefaciens* strains were grown at 30°C in the dark. All *Xoo* strains were grown at 28°C in TSA medium (10 g/l tryptone, 10 g/l sucrose, 1 g/l glutamic acid). Antibiotics were used at the following concentrations if required: 100  $\mu$ g/ml ampicillin, 10  $\mu$ g/ml cephalixin, 25  $\mu$ g/ml chloramphenicol, 25  $\mu$ g/ml kanamycin, 100  $\mu$ g/ml spectinomycin, and 10  $\mu$ g/ml tetracycline. Bacterial strains and DNA plasmids used in this study are listed in Supplemental Table 4.

#### Rice Transformation with the Genomic Fragments of R Genes

For the functional complementation of R genes, with *Xa2* as an example, an 8997-bp genomic sequence containing a 1596-bp promoter sequence, the entire coding region (5885 bp) of *Xa2*, and a 1516-bp downstream sequence, were PCR-amplified using primers 53120-F4b and 53120-R4b (Supplemental Table 1), cloned into the binary pCambia1300 vector, and linearized with *EcoRI* and *HindIII* using the Gibson Assembly Master Mix (New England BioLabs, Ipswich, MA, USA). After Sanger sequencing, the pCambia1300-*Xa2* plasmid was electroporated into the *Agrobacterium tumefaciens* EHA105 strain and introduced into calli that were induced from the immature embryos of the *japonica* variety, Kitaake. The rice transformation method was used as described previously (Hiei et al., 1997). Transgenic plants were genotyped with primers BB2-F1 and M13F (Supplemental Table 1). The genomic fragments of the other R genes (*Xa31(t)*, CGS-*Xo1<sub>11</sub>*, *Xa14*, and *Xa45(t)*) were PCR-amplified and introduced into Kitaake by *Agrobacterium*-mediated transformation as indicated.

#### *iTal3* and *iTal6* Deletion in PXO86

Based on the PXO86 genomic sequence (NCBI accession, CP007166.1), two pairs of primers, 86TalKDF1/86TalKDR1 and 86TalKDF2/86TalKDR2 (Supplemental Table 1), were used to amplify the upstream and downstream regions flanking *iTal3* (a type A iTALE gene) and *iTal6* (a type B iTALE gene) using PXO86 genomic DNA as the template. A pair of primers, KD13-F and KD13-R, was used to amplify the whole expres-

sion cassette of the kanamycin resistance gene from plasmid pKD13 (NCBI accession, AY048744.1). The three fragments were fused by overlapping PCR, and the resulting fragment was inserted into the pBluscript SK vector at the *EcoRV* site. The plasmid was introduced into the competent cells of PXO86 by electroporation, and the transformants were grown on TSA plates supplemented with kanamycin. Single colonies with deletions were identified by PCR using two pairs of primers, 86TAL3-F2/R2 and 86TAL6-F2/R2.

#### Disease Assays

The assay for the HR through leaf infiltration using a needleless syringe and the assay for the lesion length through leaf tip clipping were performed as described previously (Yang and Bogdanove, 2013). In brief, *Xoo* stocks, preserved in a -80°C freezer, were streaked on TSA plates supplemented with appropriate antibiotics and incubated at 28°C for 2–4 days. Cells were harvested from the plates, suspended in sterilized water and washed twice, re-suspended in water, and adjusted to an optical density of 0.5 at 600 nm. Bacterial cells in suspension were infiltrated into the leaves of 3-week-old rice plants through a blunt (needleless) syringe pressed against the underside of the leaf. The inoculation spot turned brown, and bacterial spread was restricted in resistant plants 2–3 days after infiltration, whereas the symptoms in susceptible plants were much stronger, with water soaking extending in both directions and bacterial exudate appearing at the inoculation spot. Fully expanded leaves of rice plants (6–8 weeks old) were inoculated using the leaf tip clipping method. Scissor blades were immersed in *Xoo* suspension and used to clip approximately 1–2 cm from the leaf tip. The lesion length was measured 12–14 days after inoculation. Three replications with approximately ten leaves from two to five plants per replicate were inoculated per strain. One-way analysis of variance (ANOVA) was conducted on all measurements. The Tukey honestly significant difference test was used for post-ANOVA pairwise tests for significance, which was set at 5% ( $p < 0.05$ ).

## Plant Communications

### *Xa1* Feature Sequence searching in 3000 Rice Genomes

The raw read data of 3000 rice genomes were downloaded from the Sequence Read Archive (Wang et al., 2018). Reads were subjected to adaptor clipping and quality trimming with Trimmomatic software (v0.36), keeping trimmed reads longer than 50 bp (Bolger et al., 2014). The resistant *Xa1* allele-associated sequence 5'-tctctgccacctccgca/atcagtggtatggagaa-3' (36 bp) was used to identify rice accessions potentially harboring resistant alleles. Reads carrying perfectly matched sequences were counted and normalized to the number of total reads. The sequence was absent in the reference genome (IRGSP-1.0) that carried the susceptible allele. Reads were also directly aligned to the 279-bp repeat sequence that encoded the first 93-aa LRR repeat of XA1. Alignments were conducted with the mem module of bwa (0.7.12-r1039) (Li and Durbin, 2009). Read alignments required matches of at least 50 bp with identities of 95%. Aligned reads were counted and normalized to the number of total reads.

### Sequence Analysis of iTALE Genes in Sequenced *Xo* Genomes

The complete or partial genome sequences of *Xoo* and *Xoc* strains were obtained from the NCBI (Supplemental Table 5) via BLASTn using a 690-bp sequence at the 5' coding region of *iTal3a* from PXO99<sup>A</sup>. Distinctive C-terminal sequences of iTALE genes (*iTal3a* and *iTal3b*) of PXO99<sup>A</sup> were used to categorize the iTALE genes as type A and type B. All annotations were performed through NCBI Blast and further confirmed using SnapGene software.

### ACCESSION NUMBERS

The NCBI GenBank accession numbers for *Xa2*, *Xa31(t)*, *CGS-Xo1<sub>11</sub>*, *Xa14*, and *Xa45(t)* are as follows: MT395899, MT395900, MT395901, MT395902, and MT395903, respectively.

### SUPPLEMENTAL INFORMATION

Supplemental Information is available at *Plant Communications Online*.

### FUNDING

This work was supported by the National Natural Science Foundation of China (31830072 to G.C.), the United States Department of Agriculture National Institute of Agriculture and Food (2017-67 013-26 521 to B.Y.), the Young Elite Scientist Sponsorship of the China Association for Science and Technology (2017QNRC001 to Z.J.), and the Chinese National Transgenic Major Program (2016ZX08001-002 to G.C.).

### AUTHOR CONTRIBUTIONS

C.J., S.L., G.C., and B.Y. conceived the experiments. C.J., Z.J., H.C., B.L., and H.L. performed the experiments. C.J., Z.J., and B.Y. wrote the manuscript with input from all other co-authors.

### ACKNOWLEDGMENTS

We are grateful to the U.S. National Small Grains Collection (NSGC), Dr. Zhikang Li (Institute of Crop Sciences, Chinese Academy of Agricultural Sciences), and Dr. Bin Han (Institute of Plant Physiology and Ecology, Chinese Academy of Sciences) for providing rice accessions. No conflict of interest is declared.

Received: February 23, 2020

Revised: June 3, 2020

Accepted: June 8, 2020

Published: June 20, 2020

### REFERENCES

- Adhikari, T.B., Basnyat, R.C., and Mew, T.W. (1999). Virulence of *Xanthomonas oryzae* pv. *oryzae* on rice lines containing single resistance genes and gene combinations. *Plant Dis.* **83** (1):46–50.
- Bao, S., Tan, M., and Lin, X. (2010). Genetic mapping of a bacterial blight resistance gene *Xa14* in rice. *Acta Agronomica Sin.* **36**:6.
- Bentham, A., Burdett, H., Anderson, P.A., Williams, S.J., and Kobe, B. (2017). Animal NLRs provide structural insights into plant NLR function. *Ann. Bot.* **119**, 827–702.
- Boch, J., Scholze, H., Schornack, S., Landgraf, A., Hahn, S., Kay, S., Lahaye, T., Nickstadt, A., and Bonas, U. (2009). Breaking the code of DNA binding specificity of TAL-type III effectors. *Science* **326**:1509–1512.
- Bolger, A.M., Lohse, M., and Usadel, B. (2014). Trimmomatic: a flexible trimmer for Illumina sequence data. *Bioinformatics* **30**:2114–2120.
- Boller, T., and Felix, G. (2009). A renaissance of elicitors: perception of microbe-associated molecular patterns and danger signals by pattern-recognition receptors. *Annu. Rev. Plant Biol.* **60**:379–406.
- Chu, Z., Yuan, M., Yao, J., Ge, X., Yuan, B., Xu, C., Li, X., Fu, B., Li, Z., Bennetzen, J.L., et al. (2006). Promoter mutations of an essential gene for pollen development result in disease resistance in rice. *Genes Dev.* **20**:1250–1255.
- Cook, D.E., Mesarich, C.H., and Thomma, B.P. (2015). Understanding plant immunity as a surveillance system to detect invasion. *Annu. Rev. Phytopathol.* **53**:541–563.
- Dilla-Ermita, C.J., Tandayu, E., Juanillas, V.M., Detras, J., Lozada, D.N., Dwiyantri, M.S., Vera Cruz, C., Mbanjo, E.G.N., Ardales, E., Diaz, M.G., et al. (2017). Genome-wide association analysis tracks bacterial leaf blight resistance loci in rice diverse germplasm. *Rice (N Y)* **10**:8.
- Feng, F., and Zhou, J.M. (2012). Plant-bacterial pathogen interactions mediated by type III effectors. *Curr. Opin. Plant Biol.* **15**:469–476.
- Gu, K., Yang, B., Tian, D., Wu, L., Wang, D., Sreekala, C., Yang, F., Chu, Z., Wang, G.L., White, F.F., et al. (2005). R gene expression induced by a type-III effector triggers disease resistance in rice. *Nature* **435**:1122–1125.
- He, Q., Li, D., Zhu, Y., Tan, M., Zhang, D., and Lin, X. (2006). Fine mapping of *Xa2*, a bacterial blight resistance gene in rice. *Mol. Breed.* **17**:6.
- He, W., Huang, D., Li, R., et al. (2012). Identification of a resistance gene *bls1* to bacterial leaf streak in wild rice *Oryza rufipogon* Griff. *J. Integr. Agric.* **11**:8.
- Hiei, Y., Komari, T., and Kubo, T. (1997). Transformation of rice mediated by *Agrobacterium tumefaciens*. *Plant Mol. Biol.* **35**:205–218.
- Iyer, A.S., and McCouch, S.R. (2004). The rice bacterial blight resistance gene *xa5* encodes a novel form of disease resistance. *Mol. Plant Microbe Interact* **17**:1348–1354.
- Jackson, R.W., Athanassopoulos, E., Tsiamis, G., Mansfield, J.W., Sesma, A., Arnold, D.L., Gibbon, M.J., Murillo, J., Taylor, J.D., and Vivian, A. (1999). Identification of a pathogenicity island, which contains genes for virulence and avirulence, on a large native plasmid in the bean pathogen *Pseudomonas syringae* pathovar *phaseolicola*. *Proc. Natl. Acad. Sci. U S A* **96**:10875–10880.
- Ji, Z., Ji, C., Liu, B., Zou, L., Chen, G., and Yang, B. (2016). Interfering TAL effectors of *Xanthomonas oryzae* neutralize R-gene-mediated plant disease resistance. *Nat. Commun.* **7**:13435.
- Jiang, N., Yan, J., Liang, Y., Shi, Y., He, Z., Wu, Y., Zeng, Q., Liu, X., and Peng, J. (2020). Resistance genes and their interactions with bacterial blight/leaf streak pathogens (*Xanthomonas oryzae*) in rice (*Oryza sativa* L.)—an updated review. *Rice (N Y)* **13**:3.
- Jones, J.D., Vance, R.E., and Dangl, J.L. (2016). Intracellular innate immune surveillance devices in plants and animals. *Science* **354**:aaf6395.
- Kim, S.M. (2018). Identification of novel recessive gene *xa44(t)* conferring resistance to bacterial blight races in rice by QTL linkage analysis using a SNP chip. *Theor. Appl. Genet.* **131**:2733–2743.



- Lee, S.W., Choi, S.H., Han, S.S., Lee, D.G., and Lee, B.Y. (1999). Distribution of *Xanthomonas oryzae* pv. *oryzae* strains virulent to Xa21 in Korea. *Phytopathology* **89**:928–933.
- Li, H., and Durbin, R. (2009). Fast and accurate short read alignment with Burrows-Wheeler transform. *Bioinformatics* **25**:1754–1760.
- Mew, T.W., Alvarez, A.M., Leach, J.E., and Swing, J. (1993). Focus on bacterial blight of rice. *Plant Dis.* **77**:8.
- Monteiro, F., and Nishimura, M.T. (2018). Structural, functional, and genomic diversity of plant NLR proteins: an evolved resource for rational engineering of plant immunity. *Annu. Rev. Phytopathol* **56**:243–267.
- Moscou, M.J., and Bogdanove, A.J. (2009). A simple cipher governs DNA recognition by TAL effectors. *Science* **326**:1501.
- Niño-Liu, D.O., Ronald, P.C., and Bogdanove, A.J. (2006). *Xanthomonas oryzae* pathovars: model pathogens of a model crop. *Mol. Plant Pathol.* **7**:303–324.
- Oliva, R., Ji, C., Atienza-Grande, G., Huguet-Tapia, J.C., Perez-Quintero, A., Li, T., Eom, J.S., Li, C., Nguyen, H., Liu, B., et al. (2019). Broad-spectrum resistance to bacterial blight in rice using genome editing. *Nat. Biotechnol.* **37**:1344–1350.
- Read, A.C., Moscou, M.J., Zimin, A.V., Perte, G., Meyer, R.S., Purugganan, M.D., Leach, J.E., Triplett, L.R., Salzberg, S.L., and Bogdanove, A.J. (2020). Genome assembly and characterization of a complex zFBED-NLR gene-containing disease resistance locus in Carolina Gold Select rice with Nanopore sequencing. *Plos Genet.* **16**:e1008571.
- Read, A.C., Rinaldi, F.C., Hutin, M., He, Y.Q., Triplett, L.R., and Bogdanove, A.J. (2016). Suppression of Xa1-mediated disease resistance in rice by a truncated, non-DNA-binding TAL effector of *Xanthomonas oryzae*. *Front. Plant Sci.* **7**:1516.
- Salzberg, S.L., Sommer, D.D., Schatz, M.C., Phillippy, A.M., Rabinowicz, P.D., Tsuge, S., Furutani, A., Ochiai, H., Delcher, A.L., Kelley, D., et al. (2008). Genome sequence and rapid evolution of the rice pathogen *Xanthomonas oryzae* pv. *oryzae* PXO99<sup>A</sup>. *BMC Genomics* **9**:204.
- Savary, S., Willocquet, L., Pethybridge, S.J., Esker, P., McRoberts, N., and Nelson, A. (2019). The global burden of pathogens and pests on major food crops. *Nat. Ecol. Evol.* **3**:430–439.
- Song, W.Y., Wang, G.L., Chen, L.L., Kim, H.S., Pi, L.Y., Holsten, T., Gardner, J., Wang, B., Zhai, W.X., Zhu, L.H., et al. (1995). A receptor kinase-like protein encoded by the rice disease resistance gene, Xa21. *Science* **270**:1804–1806.
- Triplett, L.R., Cohen, S.P., Heffelfinger, C., Schmidt, C.L., Huerta, A.I., Tekete, C., Verdier, V., Bogdanove, A.J., and Leach, J.E. (2016). A resistance locus in the American heirloom rice variety Carolina Gold Select is triggered by TAL effectors with diverse predicted targets and is effective against African strains of *Xanthomonas oryzae* pv. *oryzicola*. *Plant J.* **87**:472–483.
- Vera Cruz, C.M., Bai, J., Ona, I., Leung, H., Nelson, R.J., Mew, T.W., and Leach, J.E. (2000). Predicting durability of a disease resistance gene based on an assessment of the fitness loss and epidemiological consequences of avirulence gene mutation. *Proc. Natl. Acad. Sci. U S A* **97**:13500–13505.
- Wang, C., Wen, G., Lin, X., Liu, X., and Zhang, D. (2009). Identification and fine mapping of the new bacterial blight resistance gene, Xa31(t), in rice. *Eur. J. Plant Pathol.* **123**:6.
- Wang, W., Mauleon, R., Hu, Z., Chebotarov, D., Tai, S., Wu, Z., Li, M., Zheng, T., Fuentes, R.R., Zhang, F., et al. (2018). Genomic variation in 3,010 diverse accessions of Asian cultivated rice. *Nature* **557**:43–49.
- White, F.F., and Yang, B. (2009). Host and pathogen factors controlling the rice-*Xanthomonas oryzae* interaction. *Plant Physiol.* **150**:1677–1686.
- Yang, B., and Bogdanove, A. (2013). Inoculation and virulence assay for bacterial blight and bacterial leaf streak of rice. *Methods Mol. Biol.* **956**:249–255.
- Yoshimura, S., Yamanouchi, U., Katayose, Y., et al. (1998). Expression of Xa7, a bacterial blight-resistance gene in rice, is induced by bacterial inoculation. *Proc. Natl. Acad. Sci. U S A* **95**:1663–1668.
- Zuluaga, P., Szurek, B., Koebnik, R., Kroj, T., and Morel, J.B. (2017). Effector mimics and integrated decoys, the never-ending arms race between rice and *Xanthomonas oryzae*. *Front. Plant Sci.* **8**:431.

**Plant Communications, Volume 1**

**Supplemental Information**

***Xa1* Allelic *R* Genes Activate Rice Blight Resistance Suppressed by Interfering TAL Effectors**

**Chonghui Ji, Zhiyuan Ji, Bo Liu, He Cheng, Hua Liu, Sanzhen Liu, Bing Yang, and Gongyou Chen**

## SUPPLEMENTAL INFORMATION

### ***Xa1* allelic *R* genes activate rice blight resistance suppressed by interfering TAL effectors**

Chonghui Ji<sup>1,6</sup>, Zhiyuan Ji<sup>2,3,6</sup>, Bo Liu<sup>1</sup>, He Cheng<sup>4</sup>, Hua Liu<sup>1</sup>, Sanzhen Liu<sup>4</sup>, Bing Yang<sup>1,5,\*</sup> and Gongyou Chen<sup>2,\*</sup>

<sup>1</sup>Division of Plant Sciences, C. Bond Life Science Center, University of Missouri, Columbia, MO 65211, USA

<sup>2</sup>School of Agriculture and Biology/State Key Laboratory of Microbial Metabolism, Shanghai Jiao Tong University, Shanghai 200240, P.R. China.

<sup>3</sup>National Key facility for Crop Gene Resources and Genetic Improvement (NFCRI), Institute of Crop Sciences, Chinese Academy of Agricultural Sciences, Beijing 100081, P.R. China

<sup>4</sup>Department of Plant Pathology, Kansas State University, Manhattan, KS 66506, USA

<sup>5</sup>Donald Danforth Plant Science Center, St. Louis, MO 63132, USA

<sup>6</sup>These authors contributed equally to this article.

**\*Correspondence: Bing Yang (yangbi@missouri.edu), Gongyou Chen (gyouchen@sjtu.edu.cn)**

#### **Contain:**

Supplemental Figure 1

Supplemental Table 1 to 5.

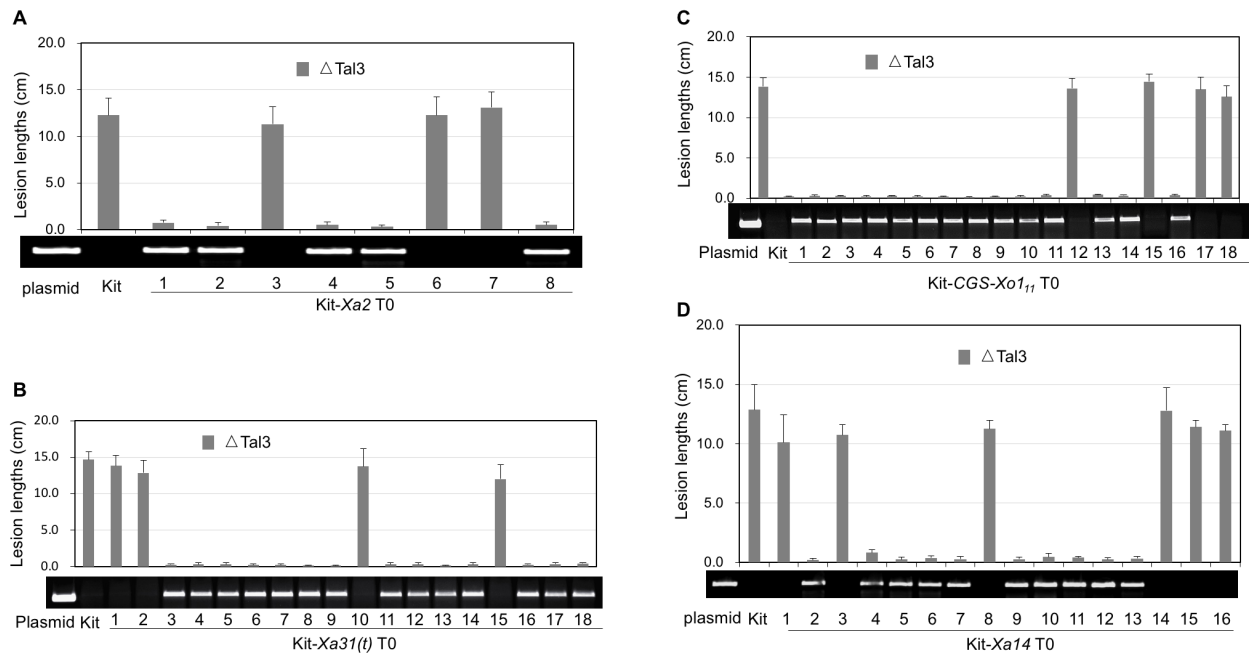

**Supplemental Figure 1. Association of genotypes and phenotypes of the *Xa2*, *Xa31(t)*, *CGS-Xo11* and *Xa14* transgenic Kitaake plants in T0 generation.** Lesion lengths (centimeter) derived from inoculation of  $\Delta$ Tal3 are presented above the gel images of PCR-amplicons from individual plants with gene specific primers.

**Supplemental Figure 2 Nucleotide sequences of and predicted amino acid sequences encoded by *Xa2*, *Xa14*, *Xa31(t)*, *CGS-Xo11* and *Xa45(t)*.** The genomic fragments cloned into pCAMBIA1300 were Sanger sequenced. The promoter sequences are in green lower letters. The sequence for start and stop codons are red and shaded in yellow; between them are introns in blue lower letters shaded in grey, the sequences encoding for 93 amino acids repeats are alternating red and blue upper letters. The terminator sequences are in black lower letters. The predicted amino acids sequences follow the DNA sequences of individual genes.

>*Xa2*

```

ttcaggaagacgggactgaatacatatcttcttaattccaaaggcattcaggatgtttatgaaagataattactgttg
tttttaggaaacatattacatcggcgcttgtcaggtaagctgacatagagtgatgttcatggtttcaaagtgaa
tatataattcctcgcgatggacaactttactatgcttctgtcaaggagatgtaaggcaaacagtaacagggattttt
gccaaactacaaactaggaagagatagacctaccgaaaatattatgtataaagggttcttgggaatattagaaaa
atataatgacaccgtagcgttagcacgggcatattactagtagaaciaaaagaaacacttatgcatttatacccaaaa
aaaaaacgtaattaatggaccgcatttctgactgtgtageggcccgctcgaagcataaactcaaaccttttaagccagag
atgggctgtggccaacatcgacataaactggaataagtccacttgccttccctcaactttacatggagtggtgatga
tggccctaattcccaataccagatgtcgaccctcaagtcttcaaaacctgcaagtagttcctcgaggggataga
ccatatttccctggtttccattgatgtggcatatatacagggcccactacctgaaccatcgccacgtccagtccttt
cggcctgttcgcatgacgagctcggccaccacctcaacatcgtccatgctgcgggcatggcgaggagacagctggg
acggtgaacctcatagctcctgtctgttgcaacatcctctcgccattctcacgcccacgacacccttgtcctcctg
ctcctgtagcagcctcgcaagctcacgcccggcctcatcgaggtcccctgtccccgagccgcttctagcatcgatga
gctgaggagctccccactgcccaggcgatgacgatttggcagggagggtcgcattcgcccactccaattcgagcgcg
tcacacctccccctccccctcctattcatccaccaccaacgcggataggagaagggatagaggaaagtgtgctgga
cacttacatattggttccatataatcttcttactcggatgccacgtcagataaaaacaaccgtcgggtcaacatttttc
gtagtggggattagggagctcatacatgactcgacgcagagctgagggatggcaagtgaacttattcccataaactt
ccaaaagtgtggaatgctcaacttgggcttctcttccggatgctgaagtgctaattgggccaataaaccaactagccca
cagcccacgcaagtggaaagccgacgagtcacccgtcaacgcggcagtagtaatccgagaaaaacgcggggtcgcgcgaa
gcaatcgtatcatcatcagacgattaatccacgcgaccaggagcgtgccccgagccacacgcgccacgcactggt
gaatcttctctcttccactagttttctcactctcctctcctactactactctgcttaccatcctcctgctt
gttgagccctcttgacacgccttggccacagtcacaaggactgctcctgttccgATGAGGAGGTGGAAGCCGGT
TGGCTGGAGGGCGGGATCAGGTGGCTGGCGGAGACCATCCTGGATAACCTGGACGCCGACAAGCTGGATGAATGGAT
TCGCCAGATTAGGCTCGCCGCTGACACCGAGAAGCTACGGGCTGAGATCGAGAAGGTGGATGGGGTGGTGGCTGCCG
TGAAGGGGAGGGCGATCGGGAACAGGTGCTGGCCCGATCGCTCGGCCGTCTCAGGGGGTTGCTGTACGACGCCGAC
GATGCGGTGACGAGCTCGACTACTTCAGGCTCCAGCAGCAGGTGAGGGAGGAGgtactgtcctttgcatatataccg
tgcttttaattaagtgtgcaagctgcgttgcctgcaacaatggtgtattggcgtcagtttccaatccatgcttgtg
ctacagTTACTACACGGTTTTGAGGCTGAAGAGACGGTCCGAGATGGAGCAGAGGACGAGGACGATATTCGATGGAC
AATACTGATGTACCGGAGGCAGTGGCGGCAGGCAGCAGCAAGAAACGGTCCAAGGCATGGGAACACTTTACTACCGT
AGAGTTCAGTCTGACGGGAAGGATTCTAAAGCACGGTGAAGTACTGCCACAAGGACCTATGTTGCACATCTAAGA
ACGGGACATCAGCTTTGCGCAACCATCTCAATGTTTGAAGAGGAAACGTGTAACAAGTACTGACCAACCCGGTAAAT
CCATCAAGgtaatgctaattggagttctgaatcttagtgtaaatccggttgaagtgtaaatttggcccgttacatctgct
caagatctcattctgtctcctaattcttctaataagccaactcatggtcatttttttctctaataatataagtagccggtgat
ggtgcaccaaagtgaattagatgcaaggaacaaaagtgaacaattgtatatacaaatataattatatactaaaaca
tgagtgtgtatcaaatccaattctttcaaaaatctactatgcaaaaattgagtgacaaaatctgctgcctttttttt
tttacagaaagcaaccaattaatataagtcaaatataaaaacgcttctgtagtctccaataaaaatagctcattgtttc
gtttatacttatgtttataaatttaaatttaaaacttaattttggagttgattttgtggttttcttttctcctatt
ttattttacaacatttgattttgaatagtttaagaatcgtatataaaaaattttaccataagttatttttaaatgt
ttaataaactcgaaggaataatcaagataagtgaaacgattctcctcctcatctacttaagatttgcgttataattgc
tgacctttctaatacgcctaaccacgatcacatgctcttccagTGCCGGTGAGGGTGCATCAAATGCAACTGGTAATT
CAGTTGGCAGAAAAGGATGAGAATGGATGGGACTTCAACACACCACGAGGCAGTTAGCACGCACCCTTGGAAACAAG
GCTGAACTTTCCAACAGGATCCAATGCATGACTCATCAGTTAGAAGAGGCTGTAAATGAGGTTATGAGGCTATGTCTG
ATCCTCAAGTTCAAACCAGAGTCGACAGGGTACACCACCGCCACAAATGCAACAACATCGTCTTATCTTCCGGAGC
CCATAGTGTATGGGAGGGCTGCAGAGATGGAAACCATCAAACAGCTGATCATGAGCAATAGATCTAATGGCATAACC
GTCCTGCCAATTGTAGGCAATGGAGGGATAGGAAAAACCACTTTGGCGCAACTGGTCTGCAAAGATCTGGTAATTAA
AAGTCAGTTTTAATGTTAAGATATGGGTGTATGTATCTGATAAATTTGATGTAGTTAAGATTACAAGGCAGATTTTGG
ATCATGTCTCCAACCAGAGCCACGAAGGAATAAGCAACCTTGATACGCTTCAGCAGGATCTTGAGGAACAAATGAAA

```

TCTAAGAAGTTTCCTCATTGTCTTAGATGATGTGTGGGAAATCCGTACAGATGACTGGAAAAACTACTGGCTCCTTT  
AAGACCTAATGATCAGGTGAATTCATCACAGGAAGAGGCAACAGGTAATATGATAATTTTGACAACCTCGTATACAGA  
GTATTGCCAAAAGTCTTGGAACAGTACAATCAATTAAGTTAGAAGCTCTGAAAGATGACGATATATGGTCACTATTT  
AAAGTGCATGCTTTTGGTAATGATAAACATGATAGTAGTCCAGGCTTACAGGTTCTTGGGAAGCAAATGCTAGCGA  
GCTAAAAGGCAACCCACTGGCAGCAAAAACCTGTGGGTTCACTATTAGGAACGAATCTTACCATCGATCATTGGGATA  
GCATTATAAAGAGTGAAGAATGGAAATCCCTGCAACAAGCTTATGGCATCATGCAAGCGCTGAAGTTGAGCTATGAT  
CATCTATCCAACCCCTTACAGCAATGCGTCTCTTATTGTTCTCTTTTCCCAAGGGTATTCTTTTTCAGCAAAGCACA  
ACTAATACAAATATGGATTGCTCAAGGATTTGTGGAAAGAATCCAGTGAGAAGTTGGAGCAGAAAGGATGGAAATATC  
TAGCTGAGTTGGTAAATTCGGGTTTTCCTTACAGCAAGTTGAAAGCACACGGTTTTTCATCAGAATATTTTGTATGCAC  
GATCTTATGCATGATTTAGCGCAAAAAGGTTTACAAAACAGAATATGCAACTATAGATGGCTCAGAGTGCACAGAGTT  
AGCCCCAAGTATACGCCATTTGTCAATAGTAAGTATTGTTTGCATACCAGCAAGGAGAAATATAGAAACATATCTCGTA  
ATGAGGTGTTTTGAGAAAAGGTTGATGAAAGTTAAGTCAAGGAGTAAGTTGAGGTCACTGGTATTAATTTGGCAATAT  
GATTCTCATTTTTTTAAATATTTCAAAGATGCTTTCAAGGAAGCACAACATCTGCGACTGCTGCAGATCACTGCAAC  
TTATGCTGATTCTGATTCAATTTCTCTCCAGTTTGGTAAATTTACACATCTCCGGTATCTGAAAATTTGTGACCGAAG  
AATCCGGCAGAACTTTGCCCGATCTCTAAGGAAGTATTACCATCTTCAAGTACTAGATATTGGCTATAGATTTGGA  
ATTTCCCGTATATCTAATGATATAAATAATCTTCTCAGCCTGCGGCATCTTGTTCATATGATGAAGTGTGTTCTTC  
CATTGCTAACATTGGTAAAATGACCTCACTTACAGGAAGTGGCAATTTTATTGTTTCAAGAAATTTAAGTGGTTTTG  
AGGTGACACAATTGAAATCCATGAACAAGCTTGTACAACCTTAGTGTGTCTCAGCTTGAAGTGTAGAACTCAGGAG  
GAGGCATGTGGGGCAAAACTGAAAGACAAAACAACACTTAGAAAAGCTACATTTGTCCTGGAAGGATGCATGGAATGG  
ATATGACAGTGCAGAAAGCTATGAAGATGAATACGGCAGTGATATGAATATAGAAACAGAAGGGGAGGAAGTGTGAG  
TTGGTGATGCCAATGGTGCACAAAGCTTACAACATCACAGTAATATAAGCTCTGAACTTGCTTCAAGTGAAGTGTGCTC  
GAAGGTCTTGAACCACATCACGGCCTCAAGTATCTACGGATATCTGGGTATAATGGATCTACCTCCCAACTTGGCT  
TCCTTCTTCACTTACCTGTCTGCAACACTTTCATCTAGAAAAATGTGGAAAATGGCAAATACTTCTTTTAGAAAGGC  
TAGGGTTACTTGTAAAGCTCGTGTGATCAAAATGAGGAATGCAACAGAAGTCTCAATCCCTTCACTGGAGGAGCTT  
GTGTTAATTGCATTGCCAAGCTTGAACACATGCTCCTGCACCTCCATCAGGAAGTGAAGTCCAGTTTAAAGGTTCT  
GAAAATTAAGAATTGCCCTGTACTGAAGGATTTCCCTTGTGTTGAGATTTCCAGAAAATTTGAAATCGAGCGGACGT  
CGCTCATGGTTGCCCCATCTTAGCAAGCTTACCATCTATAATTTGTCCTCTTTCTGTGTGCACAGTTCTCTGCCACCT  
TCCGCAATCAGTGGTTATGGGAATATGGAAGGTGTACCCTTCCGCAATCACTTGAGGAAGTTCATCCATGAGTATGTA  
TTCTCAAGAAACTCTGCAGCCCTGCTTTTTCAGGGAACCTCACTCTCCTGAGAAAATTTACATGTACTGGGAAACTCAA  
ATTTAGTGTCTCTGCAGCTCCATTCTGCACAGCACTCGAAGAGTTGATAATTTCAAAGCTGTGAGTCTCTTAGTTCT  
CTGGATGGCTTGCAATTGCTTGGCAATCTCAGGTTGCTGCAGGCACATAGATGCCTCAGTGGTTCATGGAGAAGATGG  
AAGGTGTATCCTTCCGCAATCACTTGAGGAAGTTCATCCATGAGTATTCTCAAGAAACTCTGCAGCCCTGCTTTT  
CAGGGAACCTCACTCTCCTGAGAAAATTTACATGTAATGGGAAACTCAAATTTAGTGTCTCTGCAGCTCCATTCTGC  
ACAGCACTCGAAGAGTTGATAATTTCAAAGCTGTGAGTCTCTTAGTTCTCTGGATGGCTTGCAATTGCTTGGCAATCT  
CAGGTTGCTGCGGGCACATAGATGCCTCAGTGGTTCATGGAGAAGATGGAAGGTGTATCCTTCCGCAATCACTTGAGG  
AACTTTACATCCATGAGTATTCTCAAGAAACTCTGCAGCCCTGCTTTTTCAGGGAACCTCACTCTCCTGAGAAAATTA  
CATGTACTGGAAAATCAAATTTAGTGTCTCTGCAGCTCCATTCTGCACAGCACTCGAAGAGTTGATAATTTCAAAG  
CTGTGAGTCTCTTAGTTCTCTGGATGGCTTGCAATTGCTTGGCAATCTCAGGTTGCTGCAGGCACATAGATGCCTCA  
GTGGTTCATGGAGAAGATGGAAGGTGTATCCTTCCGCAATCACTTGAGGAAGTTCATCCATGAGTATTCTCAAGAA  
ACTCTGCAGCCCTGCTTTTTCAGGGAACCTCACTCTCCTGAGAAAATTTACATGTACTGGGAAACTCAAATTTAGTGTCT  
TCTGCAGCTCCATTCTGCACATCACTCGAAGAGTTGAAAATTTCAAAGCTGTGAGTCTCTTAGTTCTCTGGATGGCT  
TGCAATTGCTTGGCAATCTCAGGTTGCTGCAGGCACATAGATGCCTCAGTGGTTCATGGAGAAGATGGAAGGTGTATC  
CTTCCGCAATCACTTGAGGAAGTTCATCAGTGAAGTATTCTCTAGAAAATTTGCAGCCCTGCTTCTGACGAATCT  
CACCTGCTTAAAACAATTTAGAGGTATCAGGCACCACAAGTTTAAAATCTCTAGAACTGCAATCATGCAGTGCAGTGC  
AACATTTGAAGATTTCAAGGTTGTGCGTCTGCTTGTACATTGGAGGGGTTGCAATTTCTCCACGCCCTCAGGCATATG  
AAAGTATTCAGATGCCTGGCTTGGCTCCATATTTGGGAGTTTCGTGAGAGCAGGCTATGAGCTATGCCCACGACT  
GGAAAGGCTCGACATCGATGACCCCTCTATCTTACCACGTCGTTCTGCAAGCACCTCACCTCCCTCCAACGCCTAG  
AGCTTAACTATTGCGGAAGTGAAGTGGCAAGACTAACGGATGAGCAAGAGAGAGCGCTTCACTCCTCACGTCCCTG  
CAAGAGCTCCGGTTTTAAGTATTGCTACAATCTCATAGATCTTCTGCGGGGCTCCACAGCCTTCCCTCCCTCAAGAG  
GTTGGAGATCCGGAGTTGCAGGAGCATCGCGAGGCTGCCGGAGAAGGGCCTCCACCTTTCGTTTGAAGAAGTGGATA  
TCATCGCTTGCAGTAATGAGCTAGCTCAGCAGTGCAGAACTCTAGCAAGCACTCTGAAGGTCAAATTAATGGGGGA  
TATGTGAAC TGAattactcgggtggtggttaggegcacetttttccacctgcccactggeggtgggctcggttcaggcg  
ttcaagctgctgtaaatccattgcccgaatgacgaccttcagaaccgttacacaatacaaaggacatatgatggct  
agatcaactgtcgcagagctagctttgggttcacctgaaaacataaggccaaacgcggtggttcttttaatacagaagta  
tcaaaaattgggttttgggttttaacgaaaagatggttagaaattgggttttaactgagcagattctgtaccagaattct  
gtattttgctccgtaattctgtgctacgactgatggtgatttaactgatagcaatcgaccggcaaaaccaatccgc  
tccaatgcattgtcacatacaaattctataattctatctactgaaaaggatgattgctggtcattttcgtgattaca

gaaggaactgtgtatatcgtgctatTTTTGGCATTCCCCATTGGTCCCCAGGTTGTGCTCGGATCAGCCAATTTCCGGT  
GGTTAATTCACCTTTGTTGTGTCCTCTGTGCCTCAAGAATTGTTCCGCACATGCAATTCAGTTGAGCATCGCACTACG  
CAAGTTTTTTTTGTTAACAAGGAGTGGTTGACAGCATTGCAGGTTGCTAAAACCGTGTCAAAAATTTGCTAACAAA  
AGAATTCCTCCTCAGAAATAGTATGAAAATAAATGCCACATAAGTAATCTGAGTAAAACAGACAGAATCACTAGAGAA  
GACTAACGACAAAATCTTCTTTTCAATTTCTGTGGTGAAAACTCACTAACTCCGCATATAATCTCATGTATGCAT  
TGGAGGTGCATACCATTTGATCATGTATGCATTTAGCTGAACATTATCAAGAAGCAAATTTATTGCACGGGCAAAC  
ATAAGCTAAACTAATTTCTCAAGCAATTTAATAATCACAAAACAGTCTGCAATACCAAGATATATAAACTTTTGCCA  
GCATGGAGCAACAACACCGAAACACTACAATCAAGACAGCTCCAGAAAAGATTATATGTTGCTACTTCAATTGCCA  
CAGTTACAATCACCCATAATGACACATCAAATTACATAAGAGTATTAAGAGTATATGACAGTTGTAACAAAACA  
GCATTGAGAAGTAGAACAGACAGCCACATGAACCATATTCACTTCTTCAGATCAGAAAGCCTGGTGA  
TACCAATTGCTACCGTAGTCTCCATTTTCACTTATATGTACATAGGACACCTGCGCTATCAGAATAGCCACAAAGC  
CAGTTCCTCGCTACAAATTAATCTTGACTAAATCCAACAGATACCAACTCCTCTTAATCAACTTACAAAACACCT  
ACATTTTGGTGTCTCTACACCACCAATCACACAAAAGGAATTAATCATCCACCAACTCGTATCCTACTGTTAGAA  
TGGAGGCCTTACACCAGAGAATGGGCATTGCGAGATTTCTGAGACACTGTCCTTTGAGCTCCTGA

**>XA2**

MEEVEAGWLEGGIRWLAETILDNLDADKLEWIRQIRLAADTEKLRAEIEKVDGVVAAVKGRAIGNRSLARSLGRRLR  
GLLYDADDAVDELDFRLQQQVEGGVTRFEAEETVGDGAEDDDIPMDNTDVPEAVAAGSSKKRASKAWEHFTTVEF  
TADGKDSKARCKYCHKDLCCSTKNGTSALRNHLNVCKRKRVTSTDQPVNPSSAGEGASNATGNSVGRKMRMDGTST  
HHEAVSTHPWNKAELSNRIQCMTHQLEEAVNEVMRLCRSSSNQSRQGTTPPATNATSSYLPEPIVYGRAEMETIK  
QLIMSNRSNGITVLPVIVGNGGIGKTTLAQLVCKDLVIKSQFNVKIWVYVSDKFDVVKITRQILDHVSNSQHEGINS  
DTLQQDLEEQMKSKKFLIVLDDVWEIRTDWKKLLAPLRPNQVNSQEEATGNMIILTTRIQSIKSLGTVQSIK  
EALKDDDIWSLFBKVFHAFGNDKHDSSPGLQVLGKQIASELKGNPLAAKTGVSLLGTNLTIDHWDSIIKSEEWKSLQQA  
YGIMQALKLSYDHLNPLQQCVSYCSLFPKGYSFKAQLIQIWIQAQGFVEESSEKLEQKWKYLAELVNSGFLQOVE  
STRFSSEYFVMHDLMDLAQKVSQTEYATIDGSECTELAPSIHLSIVTDSAYRKEKYRNI SRNEVF EKRLMKVKS  
SKLRSVLVIGQYDSSHFFKYFKDAFKEAQHLRLLQITATYADSDSFLSSLVNSTHLRYLKIIVTEESGRTLPRSLRKY  
HLQVLDIGYRFGIPRISNDINLLSLRHLVAYDEVCSIANIGKMTSLQELGNFIVQNNLSGFVETQLKSMNKLVLQ  
SVSQLENVRTQEEACGAKLKDKQHLEKLHLSWKDAWNGYDSESYEDEYGSMDNIETEGEELSVGDANGAQLQHH  
NISSELASSEVLEGLEPHHGLKYLRI SGYNGSTSPWLPSSLTCLQTLHLEKCGKWQILPLERLGLLVKLVLIKMRN  
ATELSIPSLEELVLIALPSLNTCSCTSIRNLNSSLKVLKIKNCPVLKVFPLFEISQKFEIERTSSWLPKSLTIYN  
CPLSCVHSSLPPSA  
ISGYGEYGRCTLPQSLEELYIHEYSQETLQPCFSGNLTLLRKLHVLGNSNLVSLQLHSCTALEELIIQSCESLSSLD  
GLQLLGNLRLRLQAHRC  
LSGHGEDGRCILPQSLEELYIHEYSQETLQPCFSGNLTLLRKLHVMGNSNLVSLQLHSCTALEELIIQSCESLSSLD  
GLQLLGNLRLRLRAHRC  
LSGHGEDGRCILPQSLEELYIHEYSQETLQPCFSGNLTLLRKLHVLENSNLVSLQLHSCTALEELIIQSCESLSSLD  
GLQLLGNLRLRLQAHRC  
LSGHGEDGRCILPQSLEELYIHEYSQETLQPCFSGNLTLLRKLHVLGNSNLVSLQLHSCTSLEELKIQSCESLSSLD  
GLQLLGNLRLRLQAHRC  
LSGHGEDGRCILPQSLEELFISEYSLETLQPCFLTNTLCLKQLEVSGETTSLKSLELQSCCTALEHLKIQCASLATLE  
GLQFLHALRHMKVFR  
PGLPPYLGSSSEQGYELCPRLERLDIDDP SILTTSFCKHLTSLQRLELNYCGSEVARLTDEQERALQLLTSLQELRF  
KYCYNLIDLPAGLHSLPSLKRLEIRSCRSIARLPEKGLPPSFEELDI IACSNELAQQCRTLASTLKVKINGGYVN

**>Xa31(t)**

ttcaggaagacgggactgaatacatatTTTCTTAATTCCAAAGGCATTcaggatgtttatgaaagataaactactgttg  
TTTTAGGAAACATATTACATCGGCGTTGTcaggtaaagctaacaatagagtgatgatgttcatggtttcaaagtagaa  
tataatattcctcgcacatggacaactttactatgctttgtcaaggagtagtaaggcaaacagtaacagggatTTTT  
GCCAAACTACAAACTAGGAAAGAGATAGACCTTACCAGAAAATATTATGTATAAAGGTTTCTTGGAAATATTAGAAAA  
ATATAATGACACCGTAGCGTTAGCACGGGCATATTACTAGTAGAACAAAAGAAACACTTATGCATTTATACCCAAAA  
AAAACCGTAATTAATGACCGCATTTCTGACTGTGTAGCGGCGCGTGAAGCATAACTCAAATTTTAAAGCCAGAGA  
TGGCCTAGGGCCAACATCGACATAAACTGGAATAAGTCCACTTGCCTTCCCTCACTTTACATCGAGTGTGTATGAT  
GGCCCTAATTCCTAATCAGATGTCGACCCCTCAAGTCTTCAAACCATGCAAAGTAGTCTCCTCGAGGGTATAGAC  
CATATTTCCCTGGTTTCCATTGATGTGGCATAATCAGGGCCACTACCTGAACCATCGCCAGTCCAGTCTCTT  
GGCCTGTTCCGATGACGAGCTCGGCCACCACCTCAACATCGTCCATGCTCGGGCGATGGCGAGGAGACAGCTGGGA

cggtgaacctcatagctccgtctgttgcaacatcctctcgccatgctcacgccgccacgacacccttgtcctcctgc  
tccgtagcagcctcgcaagctcacgccgcgccctcatcgagggtccctgtccccgagccgcttctagcatcgatgag  
ctgaggagctccccactgccgaggcgatgacgatttggcagggagggtcgattcgcccactccaattcgcagcgt  
cacacctccccctccccctcctattcatccaccaccaacgcggataggagaagggatagaggaaagtgtgcgtggac  
acttacatattggttccatatatTTTTTTactcggatgccacgtcagataaaacaaccgtcgggtcaacatTTTTc  
tagtggggattagggacgtcatacatgactcgacgcagagctgagggatggcaagtgaacttattcccataaaacttc  
caaaagtttggaatgctcaacttgggtcttctctcgatgctgaagtgctaattgggcaaaataaccaactagcccac  
agcccatcgaagtggagccgacgagtcaccggtcaacgcggcagtagtaatccgagaaaacgcgggtcgcgcgaag  
caatcgatcatcatcagacgattaatccacgacgaccaggagcgtgccccgagccacacgcccacacgcactgggtg  
aatcttctcctttccacctagttttcactctgcagtctcctctcctactactctgcttaccatcctcgttgg  
ttgcagccctcttgacacgcccattggccacagtcceaaggactgctcctgttccgATGGAGGAGGTGGAAGCCGGTT  
GGCTGGAGGGCGGGATCAGGTGGCTGGCGGAGACCATCCTGGATAACCTGGACGCCGACAAGCTGGATGAATGGATT  
CGCCAGATTAGGCTCGCCGCTGACACCGAGAAGCTACGGGCTGAGATCGAGAAGGTGGATGGGGTGGTGGCTGCCGT  
GAAGGGGAGGGCGATCGGGAACAGGTCGCTGGCCGATCGCTCGGCCGTCTCAGGGGGTGTGTACGACGCCGACG  
ATGCGGTGACGAGCTCGACTACTTCAAGCTCCAGCAGCAGGTGAGGGAGGAGGTACTgtctttgcatatatccgt  
gccttttaattaagtttgaagctgcggttgcctgcaacaatggtgtattggcgtcagtttccaatccatgcttgtgc  
tacagttactACACGGTTTGAGGCTGAAGAGACGGTCGGAGATGGAGCAGAGGACGAGGACGATATTCCGATGGACA  
ATACTGATGTACCGGAGGCAGTGGCGGCAGGCAGCAGCAAGAAACGGTCCAAGGCATGGGAACACTTTACTACCGTA  
GAGTTCCTGCTGACGGGAAGGATTCTAAAGCACGGTGCAAGTACTGCCACAAGGACCTATGTTGCACATCTAAGAA  
CGGGACATCAGCTTTGCGCAACCATCTCAATGTTTGAAGAGGAAACGTGTAACAAGTACTGACCAACCGGTAAATC  
CATCAAGgtaatgctaattggagttctgaatttagtgtaaatccgttgaagtgtaaatttggcccgttacatctgctc  
aagatctcattctgtctctaattctctaataagccaactcatgggtcatttttttccctaataatagtagccggtgatg  
gtgcaccaaagtgaattagatgcaaggaacaaaagtgaacaattgtatatataaaatataattatctaaaacat  
gagtagtgatcaaatccaattctttcaaaaatctactatgcaaaaattgagtgaacaaaatctgctgcctttttttt  
ttacagaaaagcaaccaattaataaagtcaaatataaaaacgcttggtagtctccaataaaaatagctcattgtttc  
ttatacttatgtttataaaatttaaaatttaaaacttaatttggagttgatttgggttttcttttcatcctattt  
tattttacaacatttgatttgaatagttagaatgcgatataaaaaatttaccataagttattttttaaattgt  
taataaatcgtaaggataatcataagtaataagtgaaacgattcgtctctcacttaagattgcggttatattgct  
gacctttctaatecgcctaaccacgatcacatgctcttccagTGCCGGTGAGGGTGCATCAAATGCAACTGGTAATTC  
AGTTGGCAGAAAAAGGATGAGAATGGATGGGACTTCAACACACCACGAGGCAGTTAGCACGCACCCTTGAACAAGG  
CTGAACTTTCCAACAGGATCCAATGCATGACTCATCAGTTAGAAGAGGCTGTAAATGAGGTTATGAGGCTATGTCGA  
TCCTCAAGTTCAAACCAGAGTCGACAGGGTACACCACCGGCCACAAATGCAACAACATCGTCTTATCTTCCGGAGCC  
CATAGTGTATGGGAGGGCTGCAGAGATGGAAACCATCAAACAGCTGATCATGAGCAATAGATCTAATGGCATAACCG  
TCCTGCCAATTGTAGGCAATGGAGGGATAGGAAAAACCCTTTGGCGCAACTGGTCTGCAAAGATCTGGTAATTTAA  
AGTCAGTTTAAATGTTAAGATATGGGTGTATGTATCTGATAAATTTGATGTAGTTAAGATTACAAGGCAGATTTTGG  
TCATGTCTCCAACCAGAGCCACGAAGGAATAAGCAACCTTGATACGCTTCCAGCAGGATCTTGAGGAACAAATGAAAT  
CTAAGAAGTTCCTCATTGTCTTAGATGATGTGTGGGAAATCCGTACAGATGACTGGAAAAACTACTGGCTCCTTTA  
AGACCTAATGATCAGGTGAATTCATCACAGGAAGAGGCAACAGGTAATATGATAATTTTGACAACCTCGTATACAGAG  
TATTGCCAAAAGTCTTGAACAGTACAATCAATTAAGTTAGAAGCTCTGAAAGATGACGATATATGGTCACTATTTA  
AAGTGCATGCTTTTGGTAATGATAAACATGATAGTAGTCCAGGCTTACAGGTTCTTGGGAAGCAAATGCTAGCGAG  
CTAAAAGGCAACCCACTGGCAGCAAAAACCTGTGGGTTCACTATTAGGAACGAATCTTACCATCGATCATTGGGATAG  
CATTATAAAGAGTGAAGAATGGAAATCCCTGCAACAAGCTTATGGCATCATGCAAGCGCTGAAGTTGAGCTATGATC  
ATCTATCCAACCCCTTACAGCAATGCGTCTCTTATTGTTCTCTTTTCCCAAGGGTTATTCTTTTCCAGCAAAGCACA  
CTAATACAAATATGGATTGCTCAAGGATTTGTGGAAGAATCCAGTGAGAAGTTGGAGCAGAAAGGATGGAAATATCT  
AGCTGAGTTGGTAAATTCGGGTTTCTTCCAGCAAGTTGAAAGCACAGGTTTTTATCAGAATATTTGTTATGCACG  
ATCTTATGCATGATTTAGCGCAAAAAGTTTCAAAACAGAATATGCAACTATAGATGGCTCAGAGTGCACAGAGTTA  
GCCCCAAGTATACGCCATTTGTCAATAGTAACTGATTTCTGCATACCAGCAAGGAGAAATATAGAAACATATCTCGTAA  
TGAGGTGTTTGAAGAAAGTTGATGAAAGTTAAGTCAAGGAGTAAAGTTGAGGTCACTGGTATTAATTTGGCAATATG  
ATTCTCATTFTTTTAAATATTTCAAAGATGCTTTCAAGGAAGCACAACATCTGCGACTGCTGCAGATCACTGCAACT  
TATGCTGATTCTGATTCATTTCTCTCCAGTTTGGTAAATTTCTACACATCTCCGGTATCTGAAAATTTGTGACCGAAGA  
ATCCGGCAGAACTTTGCCCGATCTCTAAGGAAGTATTACCATCTTCAAGTACTAGATATTGGCTATAGATTTGGAA  
TTCCCGTATATCTAATGATATAAATAATCTTCTCAGCCTGCGGCATCTTGTGTCATATGATGAAGTGTGTTCTTCC  
ATTGCTAACATTTGGTAAATGACCTCACTTCCAGGAAGTGGCAATTTTATTGTTTCAAGAAATTTAAGTGGTTTTGA  
GGTGACACAATTGAAATCCATGAACAAGCTTGTACAACCTTAGTGTGTCTCAGCTTGAAGTGTGAAACTCAGGAGG  
AGGCATGTGGGGCAAAACTGAAAGACAAACAACACTTAGAAAAGCTACATTTGTCCTGGAAGGATGCATGGAATGGA  
TATGACAGTGACGAAAGCTATGAAGATGAATACGGCAGTGATATGAATATAGAAACAGAAGGGGAGGAACTGTCAGT  
TGGTGTGCCAATGGTGCCTCAAGCTTACAACATCACAGTAATATAAGCTCTGAACTTGCTTCAAGTGAAGTGTCTCG



AAGGTCTTGAACCACATCACGGCCTCAAGTATCTACGGATATCTGGGTATAATGGATCTACCTCCCCAACTTGGCTT  
CCTTCTTCACTTACCTGTCTGCAAACACTTCATCTAGAAAAATGTGGAAAATGGCAAATACTTCTTTAGAAAGGCT  
AGGGTTACTTGTAAAGCTCGTGTGATCAAAATGAGGAATGCAACAGAACTCTCAATCCCTTCACTGGAGGAGCTTG  
TGTTAATTGCATTGCCAAGCTTGAACACATGCTCCTGCACTTCCATCAGGAACTTGAACCTCCAGTTTAAAGGTTCTG  
AAAATTAAGAATTGCCCTGTACTGAAGGTATTTCCCTTGTGTTGAGATTTCCAGAAAATTTGAAATCGAGCGGACGTC  
GTCATGGTTGCCCATCTTAGCAAGCTTACCATCTATAATTGTCTCTTTCTGTGTGCACAGTTCTCTGCCACCTT  
CCGCAATCAGTGGTTATGGAGAATATGGAAGGTGTACCCTTCCGCAATCACTTGAGGAACTTTACATCCATGAGTAT  
TCTCAAGAACTCTGCAGCCCTGCTTTTCAGGGAACCTCACTCTCCTGAGAAAATTACATGTACTGGGAACTCAA  
TTTAGTGTCTCTGCAGCTCCATTCTGCACAGCACTCGAAGAGTTGATAATTCAAAGCTGTGAGTCTCTTAGTTCTC  
TGGATGGCTTGAATTCAGTGGCAATCTCAGGTTGCTGCAGGCACATAGATGCCTCAGTGGTCATGGAGAAGATGGA  
AGGTGTATCTCTCCGCAATCACTTGAGGAACTTTACATCCATGAGTATTCTCAAGAACTCTGCAGCCCTGCTTTTC  
AGGGAACCTCACTCTCCTGAGAAAATTACATGTAATGGGAACTCAAATTTAGTGTCTCTGCAGCTCCATTCTGCA  
CAGCACTCGAAGAGTTGATAATTCAAAGCTGTGAGTCTCTTAGTTCTCTGGATGGCTTGAATTGCTTGGCAATCTC  
AGGTTGCTGCGGGCACATAGATGCCTCAGTGGTCATGGAGAAGATGGAAGGTGTATCCTTCCGCAATCACTTGAGGA  
ACTTTACATCCATGAGTATTCTCAAGAACTCTGCAGCCCTGCTTTTCAGGGAACCTCACTCTCCTGAGAAAATTAC  
ATGTACTGGGAACTCAAATTTAGTGTCTCTGCAGCTCCATTCTGCACAGCACTCGAAGAGTTGATAATTCAAAGC  
TGTGAGTCTCTTAGTTCTCTGGATGGCTTGAATTCAGTGGCAATCTCAGGTTGCTGCAGGCACATAGATGCCTCAG  
TGGTCATGGAGAAGATGGAAGGTGTATCCTTCCGCAATCACTTGAGGAACTTTACATCCATGAGTATTCTCAAGAAA  
CTCTGCAGCCCTGCTTTTCAGGGAACCTCACTCTCCTGAGAAAATTACATGTACTGGGAACTCAAATTTAGTGTCT  
CTGCAGCTCCATTCTGCACATCACTCGAAGAGTTGAAAATTCAAAGCTGTGAGTCTCTTAGTTCTCTGGATGGCTT  
GCAATTGCTTGGCAATCTCAGGTTGCTGCAGGCACATAGATGCCTCAGTGGTCATGGAGAAGATGGAAGGTGTATCC  
TTCCGCAATCACTTGAGGAACTTTTCATCAGTGGTATTCTCTAGAAAATTCAGGAACTCTGCAGCCCTGCTTCTGACGAATCTC  
ACCTGCTTAAACAATTAGAGGTATCAGGCACCACAAGTTTAAAATCTCTAGAATGCAATCATGCACTGCACCTCGA  
ACATTTGAAGATTCAAGGTTGTGCGTCGCTTGCTACATTGGAGGGGTTGCAATTCCTCCACGCCCTCAGGCATATGA  
AAGTATTCAGATGCCTGGCTTGCCTCCATATTTGGGGAGTTCGTCAGAGCAGGGCTATGAGCTATGCCACGACTG  
GAAAGGCTCGACATCGATGACCCCTCTATCCTTACCACGTCGTTCTGCAAGCACCTCACCTCCCTCCAACGCCTAGA  
GCTTAACTATTGCGGAAGTGAAGTGGCAAGACTAACGGATGAGCAAGAGAGAGCGCTTCAGCTCCTCACGTCCCTGC  
AAGAGCTCCGGTTAAGTATTGCTACAATCTCATAGATCTTCTGCGGGCTCCACAGCCTTCCCTCCCTCAAGAGG  
TTGGAGATCCGGAGTTGCAGGAGCATCGCGAGGCTGCCGGAGAAGGGCCTCCACCTTCGTTTCAAGAACTGGATAT  
CATCGCTTGCAGTAATGAGCTAGCTCAGCAGTGCAGAACTTAGCAAGCACTCTGAAGGTCAAATTAATGGGGAT  
ATGTGAAC TGA ttactcgggtggccttggttaggcgcaccttttccacctgccaactggcggtgggctcggttcaggcgt  
tcaagctgctgtaaattccattggcgcaatgacgaccttcagaaccgttacacaatacaaaggacatatgatggcta  
gatcaactgtcgcagagctagctttggttcacctgaaaacataaggccaaacgcgtgggttcttttaatacagaagtat  
caaaaattggttttggtttttaacgaaaagatggttagaaaattggttttaattgtgccagattctgtaccagaattctg  
tattttgctccgtaattctgtgctacgactgatggtgtatttaactgatagcaatcgaccggcaaaaaccaatccgct  
ccaatgcattgtcacatacaaaattctataattctatctactgaaaaggatgattgctgttcattttctgtgattacag  
aaggaaactgtgtatatcgtgctatttttgcattcacattgtgtcccagggtgtgctcggatcagccaatctcgggtgg  
ttaattcactttggtgtgctcctctgtgcaactcaagaattgttcgcacatgcaattcagttgagcatcgcactacgca  
agtttttttggtaacaaaggagtggttgacagcattgcagggtgtgtaaaaccgtgtcaaaaatttgcatacaaaaag  
aattctcttcagaaatagtatgaaaataaatgccacataagtaactctgagtaaaacagacagaatcactagagaaga  
ctaacgacaaaatcttctttttcaatttctgtggtgaaaaactcactaactccgcatataatctcatgtatgcattg  
gaggtgcataccatttcgatcatgtatgcatttagctgaacattatcaagaagcaaaatttattgcacgggcaaacat  
aagctaaactaattctcaagcaatttaataatcaaaaacagctctgcaataccaagatatataaaacttttgccagc  
atggagcaacaacaccgaaacactacaatcaagacagctcccagaaaagattatatgttgctacttcaattgccaca  
gttacaatcaccataatgacacatcaaattacataagagtattaagagtatatgacagttgtaacaaaacaactgc  
attgagaactagaacagacagccacatgaaccatattcacttcttcagatcagaaagcctggtgaactaccagtcta  
ccaattgctaccgtagtctccatttttcaattatgtacataggacacctgctgatcagaatagccacaaagcca  
gttcaactcgctacaaatcaattcttgactaaatccaacagataccaactcctcttaatacaacttcaaaaacacctac  
acttttgggtgctctacaccaccaatcacacaaaaggaaatcaatcatccaccaactcgtatcctactggttagaatg  
gaggccttacaccagagaatgggcattggccagattctgagacactgtcctttgagctccctga

>XA31(t)

MEEVEAGWLEGGIRWLAETILDNLDADKLDIEWIRQIRLAADTEKLRAEIEKVDGVVAAVKGRAIGNRSLARSLGRLR  
GLLYDADDAVDELDFRLQQQVEGGGTRFEAEETVGDGAEDDDI PMDNTDVPEAVAAGSSKKRSKAWEHFTTVEF  
TADGKDSKARCKYCHKDLCCSTSKNGTSALRNHLNVCKRKRVTSTDQPVNPSSAGEGASNATGNSVGRKMRMDGTST  
HHEAVSTHPWNKAELSNRIQCMTHQLEEAVNEVMRLCRSSSNQSRQTPPATNATSSYLPEPIVYGRAAEMETIK

QLIMSNRSNGITVLPVINGGGIGKTTLAQLVCKDLVIKSQFNVKIWVYVSDKFDVVKITRQILDHVSNOQSHEGISNL  
DTLQQDLEEQMKSKKFLIVLDDVWEIRTDWKKLLAPLRPNQVNSSQEEATGNMIILTTRIQSIKSLGTVQSIKL  
EALKDDDIWSLKFVHAFGNDKHDSSPGLQVLGKQIASSELKGNPLAAKTVGSLLGTNLTIDHWDSIIKSEEWKSLQQA  
YGIMQALKLSYDHLNPLQOCVSYCSLFPKGYFSKAQLIQIWIQAQGFVEESSEKLEQKGWKYLAELVNSGFLQQVE  
STRFSSEYFVMHDLMDLAQKVSQTEYATIDGSECTELAPSIRHLSIVTDSAYRKEKYRNI SRNEVFEEKRLMKVKS  
SKLRSVLVIGQYDSHFYFKDAFKEAQLRLLQITATYADSDSFLSSLVNSTHLRYLKIIVTEESGRTLPRSLRKY  
HLQVLDIGYRFGIPRISNDINLLSLRHLVAYDEVCSIANIGKMTSLQELGNFIVQNNLSGFEVTQLKSMNKLVQL  
SVSQLENVRTQEEACGAKLKDKQHLEKLHLSWKDAWNGYDSDESIEDEYGSMDNIETEGEELSVGDANGAQLQHHS  
NISSELASSEVLEGLEPHHGLKYLRI SGYNGSTSPTWLPSSLTCLQTLHLEKCGKWQILPLERLGLLVKLVLIKMRN  
ATELSIPSLEELVLIALPSLNTCSCTSIRNLNSSLKVLKIKNCPVLKVFPLFEISQKFEIERTSSWLPKSLTIYN  
CPLSCVHSSLPESA  
ISGYGEYGRCTLPQSLEELYIHEYSQETLQPCFSGNLTLLRKLHVLGNSNLVSLQLHSCTALEELIIQSCESLSSLD  
GLQLLGNLRLRLQAHRC  
LSGHGEDGRCILPQSLEELYIHEYSQETLQPCFSGNLTLLRKLHVMGNSNLVSLQLHSCTALEELIIQSCESLSSLD  
GLQLLGNLRLRLRAHRC  
LSGHGEDGRCILPQSLEELYIHEYSQETLQPCFSGNLTLLRKLHVLGNSNLVSLQLHSCTALEELIIQSCESLSSLD  
GLQLLGNLRLRLQAHRC  
LSGHGEDGRCILPQSLEELYIHEYSQETLQPCFSGNLTLLRKLHVLGNSNLVSLQLHSCTALEELIIQSCESLSSLD  
GLQLLGNLRLRLQAHRC  
LSGHGEDGRCILPQSLEELFISEYSLETLPFCFLTNLTCLKQLEVSGETTSLKSLELQSCCTALEHLKIQGCASLATLE  
GLQFLHALRHMKVFR  
PGLPPYLGSSSEQGYELCPRLERLDIDDPSILTTSFCKHLTSLQRLELNYCGSEVARLTDEQERALQLLTSLQELRF  
KYCYNLIDLPAGLHSLPSLKRLEIRSCRSIARLPEKGLPPSFEELDI IACSNELAQQCRTLASTLKVKINGGYVN

>CGS-Xo1<sub>11</sub>

tcctcgagggtatagaccatatttcccctggtttccattgatgtggcatatatcagggccactacctcaaccatca  
ccacgtccagtcctttcggcctgttcgcgatgacgagctcggccaccacctcaacatcgtccatgctgcggcgatgg  
cgaggagacagctgggacggtgaacctcatagctccgtctgttgcaacatcctctcgccatgctcacgtcgccacga  
cacccttgtcctcctgctccgtagcagcctcgcaagctcacgcgcggcctcgtcgaggctcctctgtccccgagccg  
cttctagcatcgatgagctgaggaactccccactgcccagggcgatgacgatttgccagggagggtcgattcgccca  
ctccaattcgcagcttcacacctccccctccccctcctattcatccaccaccaacgcggataggagaagggatagagg  
aaggtgtgcgtggacacttacatgttgggtcccatatatttttttactcggatgccacgtcagataaaaacaaccgtc  
ggtcaacatttttcgtattgaggattaggaacgtcattcatgactcgacgcagagctgagggatggcaagtgaactt  
attcccataaaaacttccaaaagtttggaatgctcaacttgggcttctcttcggatgctgaagtgctaattgggcaaaa  
taaccaactagcccacagcccacatcgaagtggaaagccgacgagtcacacgtcaacgcggcagtagtaatccgagaaaa  
cgcggtgcgcggaagcaatcgatcatcatcagacgattaatccacgacgaccaggagcgtgccccgagccacacg  
cccacacgcactggtgaatcttctcctttccacctagttttcactctgcagctcctcctcctagctactactctgcc  
ttcccctcctcgtctgttgtagccctcttgcaacagcctattggccacagctccaaggactgctcctgttccgATGAG  
GAGGTGAAGCCGGTTTGGCTGGAGGGCGGGATCAGGTGGCTGGCGGAGACCATCTGGATAACCTGGACGGCGGACAA  
GCTGGATGAGTGGATTGCCAGATTAGGCTCGCCGCTGACACCGAGAAGCTACGGGCTGAGATCGAGAAGGTGGATG  
GGGTGGTCGCTGCCGTGAAGGGGAGGGCGATCGGGAACAGGTGCTGGCCCGATCTCTCGGCCGTCTCAGGGGGTTG  
CTGTACGACGCCGACGATGCGGTGACGAGCTCGACTACTTCAGGCTCCAGCAGCAGGTCGAGGGAGGAGgtactgt  
ctttgcatatatccgtgccttttaattaagtttgcaagctgcggttgccctgcaacaatggcgtattggcgtcagtttc  
caatccatgcttgcctacagTTACTACACGGTTTGGAGCTGAAGAGACGGTCGGAGATGGAGCAGAGGACGAGGAC  
GATATTCCGATGGACAATACTGATGTACCGGAGGCAGTGGCGGCAGGCAGCAGCAAGAAACGGTCCAAGGCATGGGA  
ACACTTTACTACCGTAGAGTTCACTGCTGACGGGAAGGATTCTAAAGCACGGTGCAAGTACTGCCACAAGGACCTAT  
GTTGCACATCTAAGAACGGGACATCAGCTTTGCGCAACCATCTCAATGTTTGCAAGAGGAAACGTGTAACAAGTACT  
GACCAACCGGTAAATCCATCAAGgtaatgctaattggagttctgaatttagtgtaaatccggtgaagtgtaaatttgg  
cccgttacatctgcttaagatctcattctgtctcctaatcttctaatagccaactcatgggtcatttttttctcctaata  
tatagtaccggtgatgggtgcaccaaataatgtaattagatgcaaggaaacaaaagtgaacaattgtatataataata  
attatatacaaaacatgagtagtgatcaaatccaattctttcaaaaatctactatgcaaaaattgagtgaacaaatc  
tgctgccttttttttacagaaagcaaccaattaataaagtcaaatataaaaaacgctttgtagtctccaataaaa  
tagctcattgtttcgtttatacttatgtttataaatttaaatttaaaacttaattttggagttgattttgtggtttt  
cttttcacctattttattttacaacatttgattttgaatagtttaagaatgcttatataaaaaattttaccataagt  
tatttttaaaattgttaataaaatcgtaaggataatcataagtataaagtgaacgattcgtcttcatctacttaaga  
ttcggttatattgctgacctttctaatacgcctaaccacgatcacatgctcttccagTGCCGGTGAGGGTGCATCAA

TGCAACTGGTAATTCAGTTGGCAGAAAAAGGATGAGAATGGATGGGACTTCAACACACCACGAGGCAGTTAGCACGC  
ACCCTTGGAAACAAGGCTGAACTTTCCAACAGGATCCAATGCATGACTCATCAGTTAGAAGAGGCTGTAAATGAGGTT  
ATGAGGCTATGTCGATCCTCAAGTTCAAACCAGAGTCGACAGGGTACACCACCGGCCACAAATGCAACAACATCGTC  
TTATCTTCCGGAGCCCATAGTGTATGGGAGGGCTGCAGAGATGGAACCATCAAACAGCTGATCATGAGCAATAGAT  
CTAATGGCATAACCGTCTGCCAATTGTAGGCAATGGAGGGATAGGAAAAACCCTTTGGCGCAACTGGTCTGCAAA  
GATCTGGTAATTTAAAGTCAGTTTAAATGTTAAGATATGGGTGTATGTATCTGATAAATTTGATGTAGTTAAGATTAC  
AAGGCAGATTTTGGATCATGTCTCCAACCAGAGCCACGAAGGAATAAGCAACCTTGATACGCTTCAGCAGGATCTTG  
AGGAACAAATGAAATCTAAGAAGTTCCTCATTGTCTTAGATGATGTGTGGGAAATCCGTACAGATGACTGGAAAAA  
CTACTGGCTCCTTTAAGACCTAAAGATCAGGTGAATTCGTACAGGAAGAGGCAACAGGTAATATGATAATTTTGAC  
AACTCGTATACAGAGTATTGCCAAAAGTCTTGGAACAGTACAATCAATTAAGTTAGAAGCTCGAAAGATGACGATA  
TATGGTCACTATTTAAAGTGCATGCTTTTGGTAATGATAAACATGATAGTAGTCCAGGCTTACAGGTTCTTGGGAAG  
CAAATTTGTCAGCGAGCTAAAAGGCCAACCCACTGGCAGCAAAAACTGTGGGTTCACTATTAGGAACGAATCTTACCAT  
CGATCATTGGGATAGCATTATAAAGAGTGAAGAATGAAATCCCTGCAACAAGCTTATGGCATCATGCAAGCGCTGA  
AGTTGAGCTATGATCATCTATCCAACCCCTTACAGCAATGCGTCTCTTATTGTTCTCTTTTCCCAAGGGTTATTCT  
TTCAGCAAAGCACAATAATAAATATGGATTGCTCAAGGATTTGTGGAAGAATCCAGTGAGAAGTTGGAGCAGAA  
AGGATGGAATATCTAGCTGAGTTGGTAAATTCGGGTTTCTTCAGCAAGTTGAAAGCACACGGTTTTTCATCAGAAT  
ATTTTGTATGCACGATCTTATGCATGATTTAGCGCAAAAGGTTTCAAAAACAGAATATGCAACTATAGATGGCTCA  
GAGTGCACAGAGTTAGCCCCAAGTATACGCCATTTGTCAATAGTAACTGATTCTGCATACCGCAAGGAGAAATATAG  
AAACATATCTCGTAATGAGGTGTTTGGAGAAAAGGTTGATGAAAGTTAAGTCAAGGAGTAAGTTGAGGTCAGTGGTAT  
TAATTTGGGCAATATGATTCTCATTTTTTAAATATTTCAAAGATGCTTTCAAGGAAGCACAACATCTGCGACTGCTG  
CAGATCACTGCAACTTATGCTGATTCTGATTCAATTTCTCTCCAGTTTGGTAAATTTACACATCTCCGGTATCTGAA  
AATTTGTGACCGAAGAATCCGGCAGAACTTTGCCCGATCTCTAAGGAAGTATTACCATCTTCAAGTACTAGATATTG  
GCTATAGATTTGGAATTTCCCGTATATCTAATGATATAAATAATCTTCTCAGCCTGCGGCATCTTGTTCATATGAT  
GAAGTGTGTTCTTCCATTGCTAACATTGGTAAAATGACCTCACTTCAGGAAGTGGCAATTTTATTGTTTTCAGAAATA  
TTAAGTGGTTTTGAGGTGACACAATTGAAATCCATGAACAAGCTTGTACAACCTTAGTGTGTCTCAGCTTGAAAATG  
TTAGAACTCAGGAGGAGGCATGTGGGGCAAACTGAAAGACAAAACAACACTTAGAAAAGCTACATTTGTCTGGAAG  
GATGCATGGAATGGATATGACAGTGACGAAAGCTATGAAGATGAATACGGCAGTGATATGAATATAGAAACAGAAGG  
GGAGGAATGTCAAGTTGGTGTGCCAATGGTGCACAAAGCTTACAACATCACAGTAATATAAGCTCTGAACTTGCTT  
CAAGTGAGGTGCTCGAAGGTCTTGAACCACATCAGGCCTCAAGTATCTACGGATATCTGGGTATAATGGATCTACC  
TCCCCAACTTGGCTTCTTCTTCACTTACCTGTCTGCAAACTTCACTCTAGAAAAATGTGGAAAATGGCAAACTACT  
TCCTTTAGAAAAGGCTAGGGTTACTTGTAAAGCTCGTGTTGATCAAAATGAGGAATGCAACAGAAGCTCTCAATCCCTT  
CACTGGAGGAGCTTGTGTTAATTGCATTGCCAAGCTTGAACACATGCTCCTGCACCTCCATCAGGAAGTGAAGTCC  
AGTTTAAAGGTTCTGAAAATTAAGAATTGCCCTGTACTGAAGGATTTCCCTTGTGTTGAGATTTCCAGAAAATTTGA  
AATCGAGCGGACGTCGTCATGGTTGCCCATCTTAGCAAGCTTACCATCTATAATTATCCTCTTTTCTGTGTGCACA  
GTTCTCTGCCACCTTCCGCAATCAGTGGTTATGGAGAATATGGAAGGTGTACCCTTCCGCAATCACTTGGGAACTT  
TACATCCATGAGTATTCTCAAGAACTCTGCAGCCCTGCTTTTTCAGGGAACCTCACTCTCCTGAGAAAATTACATGT  
ACTGGGAACTCAAATTTAGTGTCTCTGCAGCTCCATTCTGCACAGCACTCGAAGAGTTGATAATTCAAAGCTGTG  
AGTCTCTTAGTCTCTGGATGGCTTGAATTTGCTTGGCAATCTCAGGTTGCTGCAGGCACATAGATGCCTCAGTGGT  
CATGGAGAAGATGGAAGGTGTATCCTTCCGCAATCACTTGGGAACTTTACATCCATGAGTATTCTCAAGAACTCT  
GCAGCCCTGCTTTTTCAGGGAACCTCACTCTCCTGAGAAAATTACATGTACTGGGAACTCAAATTTAGTGTCTCTGC  
AGCTCCATTCTGCACAGCACTCGAAGAGTTGATAATTCAAAGCTGTGAGTCTCTTAGTCTCTGGATGGCTTGCAA  
TTGCTTGGCAATCTCAGGTTGCTGCAGGCACATAGATGCCTCAGTGGTTCATGGAGAAGATGGAAGGTGTATCCTTCC  
GCAATCACTTGGGAACTTTACATCCATGAGTATTCTCAAGAACTCTGCAGCCCTGCTTTTTCAGGGAACCTCACTC  
TCCTGAGAAAATTACATGTACTGGGAACTCAAATTTAGTGTCTCTGCAGCTCCATTCTGCACAGCACTCGAAGTG  
TTGATAATTCAAAGCTGTGAGTCTCTTAGTCTCTGGATGGCTTGAATTTGCTTGGCAACCTCAGGTTGCTGCAGGC  
ACATAGATGCCTCAGTGGTTCATGGAGAAGATGGAAGGTGTATCCTTCCGCAATCACTTGGGAACTTTACATCCATG  
AGTATTTCAAGAACTCTGCAGCCCTGCTTTTTCAGGGAACCTCACTCTCCTGAGAAAATTACATGTACTGGGAACT  
TCAAATTTAGTGTCTCTGCAGCTCCATTCTGCACAGCACTCGAAGTGTGATAATTCAAAGCTGTGAGTCTCTTAG  
TTCTCTGGATGGCTTGAATTTGCTTGGCAATCTCAGGTTGCTGCAGGCACATAGATGCCTCAGTGGTTCATGGAGAAG  
ATGGAAGGTGTATCCTTCCGCAATCACTTGGGAACTTTTTCATCAGTGTAGTATTCTCTAGAAAATCTGCAGCCCTGC  
TTCCTGACGAATCTCACCTGCTTAAAACAATTAAGGGTATCAGGCACCACAAGTTTCAAATCTCTAGAACTGCAATC  
ATGCACTGCACTCGAACATTTGAAGATTCAAGGTTGTGCGTCTGCTTGTACATTGGAGGGGTTGCAATTTCTCCACG  
CCCTCAGGCATATGGAAGTATTAGATGCCTGGCTTGCTCCATATTTGGGGAGTTTCGTGAGAGCAGGGCTATGAG  
CTATGCCACGACTGGAAAGGCTCGACATCGATGACCCCTCTATCCTTACCACGTCGTTCTGCAAGCACCTCACCTC  
CCTCCAACGCCTAGAGCTTAACTATTGCGGAAGTGAAGTGGCAAGACTAACGGATGAGCAAGAGAGAGCGCTTACGC  
TCCTCACGTCCCTGCAAGAGCTCCGGTTAAGTATTGCTACAATCTCATAGATCTTCTGCGGGGCTCCACAGCCTT  
CCCTCCCTCGAGAGGTTGGAGATCCGGAGTTGCAGGAGCATCGCGAGGCTGCCGGAGAAGGGCCTCCACCTTCTGTT

CGAAGAACTGGATATCATCGCTTGCAGTAATGAGCTAGCTCAGCAGTGCAGAACTCTAGCAAGCACTCTGAAGGTCA  
AAATTAATGGGGGATATGTGAAC TGAattactcgggtggcttggtaggcgcacctttttccacctgcccaactggcgtg  
ggctcgttcaggcggtcaagctgctgtaaattccattgccgcaatgacgaccttcagaaccgttacacaatacaaag  
gacatatgatggctagatcaactgtcgcagagctagctttgggtcacctgaaaacataaggccaaacgcgtgggttct  
ttaatcagaagtatcaaaaattgggttttgggttttaacgaaaagatgtagaaattgggttttaatgtgccagattc  
tgtaccagaattctgtattttgctccgtaattctgtgctacgactgatggttatttaactgatagcaatcgaccgg  
caaaaccaatccgctccaatgcattgtcacatacaaattctataattctatctactgaaaaggatgattgctgttca  
ttttcgtgattacagaaggaactgtgtatatcgtgctatttttgcatcaccattgtgtcccagggtgtgctcggatc  
agccaatttcgggtggtaattcactttgttgtgctcctctgtgcaactcaagaattgttcgcacatgcaattcagttga  
gcatcgcactacgcaagtttttttggtaacaaaggagtgggtgacagcattgcagggttgctaaaaccgtgtcaaaa  
at ttgctaacaaaagaattctcttcagaaatagtatgaaaataaatgccacataagtaattctgagtaaaacagacag  
aatcactagagaagactaacgacaaaatctctttttcaatttctgtggtgaaaaactcactaactccgcataataat  
ctcatgtatgcattggaggtgcataccatttcgcatcatgtatgcatttagctgaacattatcaagaagcaaatttat  
tgcacgggcaaacataagctaactaattctcaagcaatttaataatcacaaaacagctctgcaataccaagatataat  
aaaacttttgccagcatggagcaacaacaccgaaacactacaatcaagacagctcccagaaaagattatatgttgct  
acttcaattgccacagttacaatcaccataatgacacatcaaattacataagagtattaagagtatatgacagttg  
taacaaaacaactgcattgagaactagaacagacagccacatgaaccatattcacttcttcagatcagaaagcctgg  
tgaactaccagttaccaattgctaccgtagtctccatttttcaacttatgtacataggacacctgcgctatcaga  
atagccacaaagccagttcactcgctacaaattaatcttgactaaatccaaacagataccaactcctcttaatacaac  
ttacaaaacacctacacttttgggtgctctacaccaccaatcacacaaaaggaaattaatcatccaccaactcgtat  
cctactgttagaatggaggccttacaccagagaatgggcattgccagattctgagacactgtcctttgagctccctg  
a

>CGS-XO1<sub>11</sub>

MEEVEAGLLEGGIRWLAETILDNLDADKLEWIRQIRLAADTEKLRAEIEKVDGVVAAVKGRAIGNRSLARSLGRLR  
GLLYDADDAVDELDFRLQQQVEGGVTRFEAEETVGDGAEDDDI PMDNTDVPEAVAAGSSKKRKSWEHFTTVEF  
TADGKDSKARCKYCHKDLCCSTKNGTSALRNHLNVCKRKRVTSTDQPVNPS SAGEGASNATGNSVGRKRMRMDGTST  
HHEAVSTHPWNKAELSNIQCMTHQLEEAVNEVMRLCRSSSNQSRQGTTPPATNATTSSYLPEPIVYGRAEMETIK  
QLIMSNRSNGITVLPVIVGNGGIGKTTLAQLVCKDLVIKIQFNVIWVYVSDKFDVVKITRQILDHVSNSQ SHEGISNL  
DTLQQDLEEQMKS KFLIVLDDVWEIRTDDWKLLAPLRPKDQVNSSQEEATGNMI ILTTRIQSI AKSLGTVQSIKL  
EALKDDDIWLSLFKVHAFGNDKHDSSPGLQVLGKQIASSELKGNPLAAKTVGSLGTLNLTIDHWDSI IKSEEWKSLQQA  
YGIMQALKLSYDHLNPLQOCVSYCSLFPKGYSFKAQLIQIWIQAQGFVEESSEKLEQKGWKYLAELVNSGFLOQVE  
STRFSSEYFVMHDLMDLAQKVSQTEYATIDGSECTELAPSI RHLSIVTDSAYRKEKYRNI SRNEVF EKRLMKVKS  
SKLRLSLVLIQYD SHFFKYFKDAFKEA QHLRLLQITATYADSDSFLSSLVNSTHLRYLKI VTEESGRTLPRSLRKY  
HLQVLDIGYRFGIPRISNDINLLSLRHLVAYDEVCSIANIGKMTSLQELGNFIVQNNLSGFVETQLKSMNKLVLQ  
SVSQLENVRTQEEACGAKLKDKQHLEKLHL SWKDAWNGYDSDESYEDEYGS DMNIETE GEELSVGDANGA QSLQHHS  
NISSELASSEVLEGLEPHHGLKYLRI SGYNGSTSPTWLPSLTLCLQTLHLEKCGKWQILPLERLGLLVKLVLIKMRN  
ATELSIPSLLEELVLIAPSLNTCSCTSIRNLNSSLKVLKIKNCPVLKVFLFEISQKFEIERTSSWLP HLSKLT IYN  
YPLSCVHSSLPPSA  
ISGYGEYGRCTLPQSLEELYI HEYSQETLQPCFSGNLTLLRKLHVLGNSNLVSLQLHSCTALEELI IQSCELSLSSLD  
GLQLLGNLRLRLQAHR  
LSGHGEDGRCILPQSLEELYI HEYSQETLQPCFSGNLTLLRKLHVLGNSNLVSLQLHSCTALEELI IQSCELSLSSLD  
GLQLLGNLRLRLQAHR  
LSGHGEDGRCILPQSLEELYI HEYSQETLQPCFSGNLTLLRKLHVLGNSNLVSLQLHSCTALEELI IQSCELSLSSLD  
GLQLLGNLRLRLQAHR  
LSGHGEDGRCILPQSLEELFISEYSLETLQPCFLTNTLCLKQLRVSGTTSFKSLELQSCCTALEHLKI QGCASLATLE  
GLQFLHALRHMEVFRC  
PGLPPYLGSSSEQGYELCPRLERLDIDDPSILTTSFCKHLTSLQRLELNYCGSEVARLTDEQERALQLLTSLQELRF  
KYCYNLIDLPAGLHSLPSLERLEIRSCRSIARLPEKGLPPSFEELDI IACSNELAQQCRTLASTLKV KINGGYVN

>Xa14

ttcaggaagacgggactgaatacatatcttcttaattccaaaggcatttaggatgtttatgaaagataattactgttg  
tttttaggaaacatattacatcggcggtgtcaggttaagctgacatagagtgatgatgttcatgggttcaaagagaa  
tatatatattcctcgcacgacaaactttactatgctttgtcaaggagatgtaaggcaaacagtaacagggattttt  
gccaaactacaaactaggaagagatagacctaccgaaaatattatgtataaagggttcttggaatattagaaaa  
atataatgacaccgtagcgttagcacgggcatattactagtagaacaagaacacttatgcatttatacccaaaa  
aaaaacgtaattaatggacggcatttcgtactgtgtagcggcccgtcgaagcataaactcaaacttttaagccagaga  
taggcctgggccaacatcgacataaactggaataagtccacttgccttccctcaactttacatggagtggtgatgat  
ggcctaattccaataaccagatgtcgaccctcaagtcttcaaaacctgcaaagtagttcctcgagggtatagac  
catatctccctgggttccattgatgtggcatatcagggcccactacctgaacctcgccacgtccagtcctttc  
ggcctgttcgcgatgacgagctcggccaccacctcaacatcgtccatgctgcccgcgatggcgaggagacagctggga  
cgggtgaacctcatagctccgtctgttgcaacatcctctcgccatgctcagcgcgccacgacaccttgtcctcctgc  
tccgtagcagcctcgcaagctcagcgcgggctcatcgaggtccctgtccccgagccgcttctagcatcgatgag  
ctgaggagctccccactgcccaggcgatgacgatttggcagggagggtcgattcgcccactccaattcgacagct  
cacacctccccctccccctcctattcatccaccacaacgcggataggagaaggatagaggaaggtgtgcgtggac  
acttacatattggttccatataatcttttttttactcggatgccacgtcagataaaaacaaccgtcggccaacatctt  
gtagtggggattagggacgtcatacatgactcgacgcagagctgagggatggcaagtgaacttattcccataaactt  
ccaaaagtttggaaatgctcaacttgggcttctctcctcgatgctgaagtgtcaatgggccaataaccaactagccca  
cagcccacgaaagtgaagccgacgagctccaccgtcaacgcggcagtagtaatccgagaaaaacgcccgtcgcgcgaa  
gcaatcgatcatcatcagacgattaatccacgacgaccaggagcgtgccccgagccacacgcccacacgcactggt  
gaatcttctcctttccacctagtttctactctgcagctcctctcctagctactactcgtccttcccatcctcgctt  
gttcgacccctcttgcacacgccattggccacagctccaaggactgctcctgttccgATGGAGGAGGTGGAAGCCGGT  
TTGCTGGAGGGCGGGATCAGGTGGCTGGCGGAGACCATCCTGGATAACCTGGATGCCGACAAGCTGGATGAGTGGAT  
TCGCCAGATTAGGCTCGCCGCTGACACCGAGAAGCTACGGGCTGAGATCGAGAAGGTGGATGGGGTGGTTCGCTGCCG  
TGAAGGGGAGGGCGATCGGGAACAGGTGCTGGCCCCGATCTCTCGGCCGTCTCAGGGGGTGTGTACGACGCCGAC  
GATGCGGTGACGAGCTCGACTACTTCAGGCTCCAGCAGCAGGTGAGGGGAGGAGgtactgtctttgcatatccgtg  
ccatcttaattaagtgtgcaagctgctgctgcaacaatggcgtcagttccaacctgcttgtgctacagTTAT  
TACACGGTTTGGAGCTGAAGACACGGTTGGAGATGGAGCAGAGGACGAAGGCATATCCGATGGACAATACTGATG  
TACCGCGGGCGGTGCGGCAGGCCGACGACGAAGAAACGGTCCAAGGCATGGGAACACTTTACTCCCCTAGAGTTC  
ACTGCTGATGGGAAGGCTTCTAAAGCACGGTGCAGACTGCCACAAGGACCTATGTTGCACATAAGAACGGGAC  
ATCAGCTTTGCGCAACCATTCTCAATGTTTGAAGAGGAAACGTGTAACAAGTACTGACCAACCGTAAATCCATCAA  
Ggtaatgctaattggagttctgaatlttagtgtaaatccgttgaagtgtaaatlttggcccgttacatctgcttaagatc  
tcattctgtctctaatcttctaatagccaactcatgggtcatttttttctctaatatatagtaccggtgatggtgcac  
caaatgtaattagatgcaaggaaacaaaagtgaacaattgtatataataataataataataataataataataata  
tgtatcaaatccaattctttcaaaaatctactatgcaaaaattgagtgaacaaaatctgctgccttttttttacagaa  
agcaaccaattaataaagtcaaatataaaaacgcttggtagtctccaataaaaatagctcattgtttcgtttataact  
tatgtttataaaatlttaaaatlttaaaacttaatlttggagttgattlttgggttttcttttctcctatttttattttac  
aacatlttgatlttgaatagtttaagaatgcttatataaaaatlttaccataagttatlttttaaaatgttaataaat  
cgtaaggataatcataagtataagtgaacgatcctcctctacttaagattgctgttatattgctgaccttcc  
taatcgcctaaccacgatcacatgctcttccagTGCCGGTGGAGGTGCATCAAATGCAACTGGTAATTCAGTAGGCA  
GAAAAAGGATGAGAATGGATGGGACTTCAACACACCACGAGGCAGTTAGCACGCACCCTTGAACAAGGCTGAACTT  
TCCAACAGGATCCAATGCATGACTCATCAGTTAGAAGAGGCTGTAATGAGGTTATGAGGCTATGTCGATCCTCAAG  
TTCAAACCAGAGTGCACAGGGTACATCACCGGCCACAAATGCAACAACATCGTCTTATCTTCCGGAGCCCATAGTGT  
ATGGGAGGGCTGCAGAGATGGAAACCATCAAACAGCTGATCATGAGCAATAGATCTAATGGCATAACCGTCTGCCA  
ATTGTAGGCAATGGAGGGATAGGAAAAACACTTTGGCGCAACTGGTCTGCAAAGATCTGGTAATTTAAAGTCAGTT  
TAATGTTAAGATATGGGTGTATGTATCTGATAAATTTGATGTAGTTAAGATTACAAGGCAGATTTTGGATCATGTCT  
CCAACCAGAACCACGAAGGAATAAGCAACCTTGATACGCTTCAGCAGGATCTTGAGGAACAAATGAAATCTAAGAAG  
TTCCTCATTGTCTTAGATGATGTGTGGGAAATCCGTACAGATGACTGGAAAAAATACTGGCTCCTTTAAGACCTAA  
TGATCAGGTGAATTCGTACAGGAAGAGGCAACAGGTAATATGATAATTTGACAACCTCGTATACAGAGTATTGCCA  
AAAGTCTTGAACAGTACAATCAATTAAGTTAGAAGCTCTGAAAGATGACGATATATGGTCACTATTTAAAGTGCAT  
GCTTTTGGTAATGATAAATCATGATAGTAGTCCAGGCTTACAGGTTCTTGGGAAGCAAATGCTAGCGAGCTAAAAGG  
CAACCCACTGGCAGCAAAAATACTGTGGGTTCACTATTAGGAACGAATCTTACCATCGATCATTGGGATAGCATTATAA  
AGAGTGAAGAATGGAAATCCCTGCAACAAGCTTATGGCATCATGCAAGCGCTGAAGTTGAGCTATGATCATCTATCC  
AACCCCTTACAGCAATGCGTCTCTTATTGTTCTCTTTTCCCAAGGGTTATTCTTTTCCAGCAAAGCACAATAATACA  
AATATGGATTGCTCAAGGATTTGTGGAAGAATCCAGTGAGAAGTTGGAGCAGAAAGGATGGAAATATCTAGCTGAGT  
TGGTAAATTCGGGTTTCTTCCAGCAAGTTGAAAGCACACGGTTTTTTCATCAGAATATTTTGTATGCACGATCTTATG  
CATGATTTAGCGCAAAAGGTTTTCACAAACAGAATATGCAACTATAGATGGCTCAGAGTGCACAGAGTTAGCCCCAAG  
TATACGCCATTTGTCAATAGTAACTGATTCTGCATACCGCAAGGAGAAATATAGAAACATATCTCGTAATGAGGTGT

TTGAGAAAAGGTTGATGAAAGTTAAGTCAAGGAGTAAGTTGAGGTCACCTGGTATTAATTGGGCAATATGATTCTCAT  
TTTTTTAAATATTTCAAAGATGCTTTCAAGGAAGCACAACATCTGCGACTGCTGCAGATCACTGCAACTTATGCTGA  
TTCTGATTCAATTTCTCTCCAGTTTGGTAAATTCTACACATCTCCGGTATCTGAAAATTGTGACCGAAGAATCCGGCA  
GAACTTTGCCCGATCTCTAAGGAAGTATTACCATCTTCAAGTACTAGATATTGGCTATAGATTTGGAATCCCCGT  
ATATCTAATGATATAAATAATCTTCTCAGCCTGCGGCATCTTGTTCATATGATGAAGTGTGTTCTTCCATTGCTAA  
CATTGGTAAAATGACCTCACTTCAGGAAGTGGCAATTTTATTGTTTCAAGATAATTTAAGTGGTTTTGAGGTGACAC  
AATTGAAATCCATGAACAAGCTTGTACAACCTTAGTGTGTCTCAACTTGGAAATGTTAGAAGTCAAGGAGGAGGCATGT  
GGGGCAAACTGAAAGACAAACAACACTTAGAAAAGCTACATTTGTCTTGGAAAGGATGCATGGAATGGATATGACAG  
TGACGAAAGCTATGAAGATGAATACGGCAGTGTATGAATATAGAAACAGAAGGGGAGGAAGTGTGAGTTGGTGTG  
CCAATTGGTGCCCAAAGCTTACAACATCACAGTAATATAAGTCTGAAGTGTCAAGTGTGAGTGTGCTCAAGGTTCT  
GAACCATCACGGCTCAAGTATCTACGGATATCTGGGTATAATGGATCTACCTCCCCAAGTGGCTTCTTCTTCTT  
ACTTACCTGTCTGCAAAACACTTTCATCTAGAAAAATCTGGAAAATGGCAAACTTCTTCTTAGAAAGGCTAGGGTTAC  
TTGTAAAGCTCGTGTGATCAAAATGAGGAATGCAACAGAAGTCTCAATCCCTTCACTGGAGGAGCTTGTGTTAATT  
GCATTGCCAAGCTTGAACACATGCTCCTGCACTTCCATCAGGAAGTGAAGTCCAGTTTAAAGGTTCTGAAAATTAA  
GAATTGCCCTGTACTGAAGGATTTCCCTTGTGTTGAGATTTGCCAGAAATTTGAAATCGAGCGGACGTCGTCATGGT  
TGCCCCATCTTAGCAAGCTTACCATCTATAATTGTCCTCTTCTGTGTGCACAGTTCTCTGCCACCTTCATCTATT  
ACATATTGCTATGATTTAACATTCTACGGCAGCAAGGTAGATTTGCTGGATTTACCTCCCTTGAGGAGTTAGTGAT  
TTCACGATGCCCCAAGCTGGTGTGTTCTTGGCGCATAACGACGGAAATGATGAACAGTCAATGGAAGATGGCTCC  
TACCGCTATCACTTGGAAAAGTGGATTAAGTATGTTGATTCCCTAAAACGCTGCAGCTCTGCTTCCGGGGAAC  
CTCACCCGCTGAAAAAAGTGTAGTGTGGGAAACCAAGTTTAAACATCTCTGCAGCTCCATTCTGCACAGCACT  
CCAAGAGTTGATAATTCGAAGCTGTGAGTGCCTTAATTCTCTGGAAGGCTTGAATTTGCTCGGCAATCTCAGGTTGC  
TGTGTGCACACAGATGCCTCAGCGGCCATGAAGAAGATGGAATGTGTATCCTTCCGCAATCACTTGAGGAAATTGAC  
ATCTGGGAGTACTCTCAAGAAACGCTGCAGCCCTGCTTCCAGGGAACTCACCAGCTTGAAAAAAGTGTAGTACA  
GGGAAGCCAAAAGTTAATATCTCTGCAGCTGTATTCCTGCACAGCACTCCAAGAGTTGATGATTGAAAGTTGTGTGT  
CGCTTAATTCTCTGGAAGGCCTGCAATGGCTCGTCAACCTCAGGTTGCTGCGGGCACACAGATGCCTCAGTGGTTAT  
GGAGAAAATGGAAGGTGTATCCTTCCACAATCACTTGGGAAGTTTACATCAGAGAGTATTCTCAAGAAACGCTGCA  
GCCCTGCTTCCAGGGAACCTCACCAGCTTGAAAAAAGTGTAGTACAGGGAAGCCAAAAGTTAATATCTCTGCAGC  
TGTATTCTGCACAGCACTCAAGAGTTGATGATTGGAAGTTGTGTGTGCTTAATTCTCTGGAAGGCCTGCAATGG  
CTCGTCAACCTCAGGTTGCTGCGGGCACACAGATGCCTCAGTGGTTATGGAGAAAATGGAAGGTGTATCTTCCACA  
ATCACTTGAAGGTTCTTACATCAGAGAGTATTCTCAAGAAATTTACAGCCCTGCTTCCAGCAAGTATCTCACTTGT  
TAAAAAGATTAGAGGTATCAGGCAGTGAAGTTTCAAATCTCTGAAGTTGCAATCATGCAGTGCAGTGCAGCAATTTG  
AGGATTGAATGGTGTGCGTGCCTTGTACATTAGAGGGCTTGAATTTCCCTCCATGCCCTTAAGCATTGGAAGTATT  
CAGATGCCCTGGCTTGCTCCATATTTGGGGAGTTTATCAGGGCAGGGCTATGAGCTATGCCCACTACTGGAAAGGC  
TCGAGATCGATGACCCCTCTATCCTTACCACGTCGTTTTGCAAGAACCTCACCTCTCTCCAATACCTAGAGCTTTGC  
AGTCACGGATTGGAATGGAAGACTAACGGACGAGGAAGAGAGAGCGCTTCAACTCCTCACTTCCCTGCAAGAGCT  
CCGATTTAACTGTTGCTACAATCTCGTAGATCTTCCACAGGGCTCCACAACCTTCTCTCCCTCAAGAGGTTGGAGA  
TCTGGAATGCGGGAGCATCGCGAGGCCGCTGGAAGGGTCTCCACCTTCTGTTGGAAGAAGTGGATATCTCGGT  
TGTAGTAAAGAGCTAGTTTCAAGCAGTGCAGAAGTCTAGCAAGCAAGCTGAAGGTCGAAATTAATGGGGAATATGTGAA  
CTGAattactcgggtggcttggtagggcgacaccttttccacctgtccaactggcggtgggctcggttcaggcggtcaagct  
gctgtaaattccattgcccgaatgacgaccttcagaaccggtacacaatacaaaggacatatgatggctagatcaac  
tgtcgcagagctagctttgggtccacctgaaaacataaggccaaacgcggtgggttcttttaatacagaagtatcaaaaat  
tggttttggtttttaacgaaaagatggttagaaattggtttttaatgtgccagattctgtaccagaattctgtattttg  
ctccgtaattctgtgctacgactgatggtgtatattaactgatagcaatcgaccggcaaaaaccaatccgctccaatgc  
attgtcacatacaaaattctataattctatctactgaaggaactgtgtatatcgtgctatttttgcatcacttgctg  
ttccagggtgtgctcggatcagccaatttcgggtggtaattcactttgctgtgctcctctgtgcaagtgtgcaactcaag  
aattggtcgcacatgcaatcagttgagcatcgcactacgcaagttttttttttttgttaacaaaggagtggttga  
cagcattgcaggttgctaaaacagtggtcaaaaatttgctaacaaaagaattctcttcagaaatagtatgaaaataaa  
tgccacataaagtaactctgagtataaacagacagaatcactagagaagactaacgacaaaactctctttttctatttct  
gtggtgaaaaaactcagcatataatctcatgtatgcatgtgaggtgcataaccatttcgatcatgtatgcattttagctg  
aacattatcaagaagcaaatatttgacagggcaaccataagctaaactaattctcaagcaatthaataatcaaaa  
acagctctgcaataccaagatatataaaacttttgccagcatggagcaacaacactgaaacactacaatcaagacagc  
tcccagaaaagattatatgttgetacttcaattgcccacagttacaatcaccataatgacacatcaaatcacataag  
agtattaagagtatatgacagttgtaacaaaacaactgcattgagaactagaagaacagacagccacatgaaccata  
ttcacttcttcagatcagaaagcctgggtgaactaccagttaccaattgctaccgtagtctccatttttctacttata  
tgtacataggacacctgcgctatcagaatagcaacaaagccagttcactcgctacaaattaatcttgactaaatcca  
aatagataccaactcctcttaatacaacttcaaaaacacctacacttttggttgtctctacaccaccaatcacacaaaa

ggaaattaatcatccacactactcgatcctactgtagaatggaggccttacaccagagaatgggcattgccagatt  
ctgagacactgtcctttgagctccctga

>XA14

MEEVEAGLLEGGIRWLAETILDNLDADKLDDEWIRQIRLAADTEKLRAEIEKVDGVVAAVKGRAIGNRSLARSLGRLR  
GLLYDADDAVDELDFRLQQQVEGGVITRFEAEDTVGDGAEDEGDI PMDNTDVPAAAAAGRSSKRSKAWEHFTPVE  
FTADGKASKARCKYCHKDLCCSTSKNGTSALRNHLNVCKRKRVTSTDQPVNPSSAGEGASNATGNSVGRKMRMDGTS  
THHEAVSTHPWNKAELSNRIQCMTHQLEEA VNEVMRLCRSSSSNQSRQGTSPATNATTSSYLPEPIVYGRAAEMETI  
KQLIMSNRNSGITVLP IVGNNGGIGKTTLAQLVCKDLVIKSQFNVKIWVYVSDKFDVVKITRQILDHVSQNHEG I SN  
LDTLQODLEEOMKSKKFLIVLDDVWEIRTDWKKLLAPLRPNQVNSSQEEATGNMI ILTTRIQSI AKSLGTVQS I K  
LEALKDDDIWLSL FKVHAFGNDKHDSSPGLQVLGKQIASELKG NPLAAKT VGSLLGTNLTIDHWDSI IKSEEWKSLQQ  
AYGIMQALKLSYDHL SNPLQQCVSYCSLFPKGY SFSKAQLIQIWI AQGFVEESSEKLEQKGWKYLAELVNSGFLQOV  
ESTRFSSEYFVMHDL MHDLAQKVSQTEYATIDGSECTELAPSIRHLSIVTDSAYRKEKYRNI SRNEVF EKRLMKVKS  
RSKLRSLVLI GQYDSHFFKYFKDAFKEA QHLRLLQITATYADSDSFLSSLVNSTHLRYLKI VTEESGRTLPRSLRKY  
YHLQVLDIGYRFGI PRISNDINNLLSLRHLVAYDEVCS SIANIGKMTSLQELGNFIVQNNLSGFVETQLKSMNKL VQ  
LSVSQLGNVRTQEEACGAKLKDKQHLEKHLHLSWKDAWNGYDSDESYEDEYGS DMNIETEGEELS VGDANGA QSLQHH  
SNISSELASSEVLEGLEPHHGLKYLRI SGYNGSTSPTWLPSSLTCLQTLHLEKCGKWQILPLERLGLLVKLVLIKMR  
NATELSIPSLEELVLI ALPSLNTCSCTSIRNLNSSLKVLKIKNCPVLKVFPLFEICQKFEIERTSSWLP HLSKLTIIY  
NCPLSCVHSSLPPSS  
ITYCYDLTFYGSKVDFAGFTSLEELVI SRCPKLV SFLAHNDGNDEQSNGRWLLPLSLGKLE INYVDSLKTLQLCFPG  
NLTRLKKLVLGNQSLTSLQLHSCALQELI IRSCELSNSLEGLQLLGNLRLLLCAHRC  
LSGHEEDGMCILPQSLEEIDIWEYSQETLQPCFPGNLTSLKKL VVQGSQKLI SLQLYSCTALQELMIESCVSLNSLE  
GLQWLVNLRLLRAHRC  
LSGYGENGRCILPQSLEELYIREYSQETLQPCFPGNLTSLKKL VVQGSQKLI SLQLYSCTALQELMIGSCVSLNSLE  
GLQWLVNLRLLRAHRC  
LSGYGENGRCILPQSLEGLYIREYSQEILQPCFQTNLTCLKRLEVSGTGSFKSLKLQ SCTALEHLRIEW CASLATLE  
GLQFLHALKHLEVFRC  
PGLPPYLGSLSGQGYELCPLLERLEIDDPSILTTSFCKNLTSLOYLELCSHGLEMERLTDEEERALQLLTSLOELRF  
NCCYNLVDLPTGLHNL LSLKRLEIWNCGS IARPLEKGLPPSLEELDILGCSKELVQQCRTLASKL KVEINGEYVN

>Xa45(t)

ttcaggaagacgggactgaatacatatcttcttaattccaaaggcattcaggatgtttatgaaagataattactgttg  
tttttaggaacatattacatcggcggtgtcaggtaagctgacatagagtgatgatgttcattggtttcaaagtgagaa  
tatataattcctcgcgatggacaactttactatgctttgtcaaggagtagtaaggcaaacagtaacagggatTTTT  
gccaaactacaaactaggaaagagatagaccttaccgaaaatattatgtataaaggTTTTcttggaatattagaaaa  
atataatgacaccgtagcgttagcacgggcatattactagtagaaciaaaagaaacacttatgcattttatacccaaaa  
aaaaacgtaattaatggaccgcatttctgactgtgtagcggcccgtcgaagcataactcaaacttttaagccagaga  
tgggcctgggccaacatcgacataaaactggaataagtccactttccttccctcaactttacatggagtggtgatgat  
ggccctaattccaataaccagatgtcgaccctcaagtcttcaaaaccatgcaaagtagttcctcgagggtatagac  
catatctccctgggtttccattgatgtggcatatatcagggcccactacctgaaccatcgccacgtccagtcctttc  
ggcctgttcgcatgacgagctcggccaccacctcaacatcgtccatgctcggcgatggcgaggagacagctggga  
cgggtgaacctcatagctccgtctgttgcaacatcctctcgccatgctcacgcccacgacacccttgtcctcctgc  
tccgtagcagcctcgcaagctcacgcccgggtctcatcgagggtcccctgtccccgagccgcttctagcatcgatgag  
ctgaggagctccccactgccgaggcgatgacgatttggcagggagggtcgcattcggccactccaattcgcagcgt  
cacacctccccctccccctcctattcatccaccaccaacgcggataggagaaggatagaggaaagtgtgcgtggac  
acttacatattggttccatataTTTTTTTTactcggatgccacgtcagataaaaacaaccgtcgggtcaacatttttc  
gtagtggggattagggacgtcatacatgactcgacgcagagctgagggatggcaagtgaacttattcccataaaactt  
ccaaaagtttggaaatgctcaacttgggcttctctcggatgctgaagtgctaattgggccaataaccaactagccca  
cagcccactcgaagtggaagccgacgagttccaccgtcaacgcggcagtagtaatccgagaaaacgcgggtcgcgcgaa  
gcaatcgatcatcatcagacgattaatccacgcagcaccaggagcgtgccccgagccacgcgccacgcactggt  
gaaatctctcctttccacctagttttctcactctcagctcctcctcctagctactactctgcttccatcctcgtctt  
gttgcagccctcttgcacacgccattggccacagtccaaggactgctcctgttccgATG GAGGAGGTGGAAGCCGGT  
TTGCTGGAGGGCGGGATCAGGTGGCTGGCGGAGACCATCCTGGATAACCTGGACGCCGACAAGCTGGATGAGTGGAT  
TCGCCAGATTAGGCTCGCCGCTGACACCGAGAAGCTACGGGCTGAGATCGAGAAGGTGGATGGGGTGGTTCGCTGCCG

TGAAGGGGAGGGCGATCGGGAACAGGTCGCTGGCCCGATCTCTCGGCCGTCTCAGGGGGTTGCTGTACGACGCCGAC  
GATGCGGTCGACGAGCTCGACTACTTCAGGCTCCAGCAGCAGGTCGAGGGAGGAGgtactgtctttgcatatatccg  
tgccttttaattaagtttgcaagctgcgcttgcctgcaacaatggcgtattggcgtcagttccaatccatgcttgtg  
ctacagTTACTACACGGTTTTGAGGCTGAAGAGACGGTCGGAGATGGAGCAGAGGACGAGGACGATATTCGGATGGAC  
AATACTGATGTACCGGAGGCAGTGGCGGCAGGCAGCAGCAAGAAACGGTCCAAGGCATGGGAACACTTTACTACCGT  
AGAGTTCACTGCTGACGGGAAGGATTCTAAAGCACGGTGCAAGTACTGCCACAAGGACCTATGTTGCACATCTAAGA  
ACGGGACATCAGCTTTGCGCAACCATCTCAATGTTTGCAAGAGGAAACGTGTAACAAGTACTGACCAACCGGTAAAT  
CCATCAAGgtaatgctaattggagttctgaattagtgtaaatccggtggaagtgtaaatttggcccgttacatctgct  
taagatctcattctgtctctctaatcttctaatagccaactcatggtcatttttttctctaatatataagtaccggtgat  
ggtgcaccaaatgtaattagatgcaaggaacaaaagtgaacaattgtatataatcaaatataattatatactaaaaca  
tgagtagtgatcaaatccaattctttcaaaaatctactatgcaaaattgagtgacaaaatctgctgcctttttttt  
ttacagaagcaaccaattaatataagtcacaataaaaaacgctttgtagctctcaataaaaatagctcattgtttcg  
ttataacttatgtttataaatttaaaatttaaaacttaatttggagttgattttgtggttttcttttcatcctattt  
tattttacaacatttgaatttgaatagtttaagaatgcgtatataaaaaattttaccataagttatttttaaaattgt  
taataaatcgtaaggataatcataagtataagtgaacgattcgctcttcatctacttaagattgcggttatattgct  
gacctttctaactgcctaaccacgatcacatgctcttccagTGCCGGTGAGGGTGCATCAAATGCAACTGGTAATTC  
AGTTGGCAGAAAAAGGATGAGAATGGATGGGACTTCAACACACCACGAGGCAGTTAGCACGCACCCTTGGAACAAGG  
CTGAACCTTTCCAACAGGATCCAATGCATGACTCATCAGTTAGAAGAGGCTGTAAATGAGGTTATGAGGCTATGTCGA  
TCCTCAAGTTCAAACCAGAGTCGACAGGGTACACCACCGGCCACAAATGCAACAACATCGTCTTATCTCCGGAGCC  
CATAGTGTATGGGAGGGCTGCAGAGATGGAAACCATCAAACAGCTGATCATGAGCAATAGATCTAATGGCATAACCG  
TCCTGCCAATTGTAGGCAATGGAGGGATAGGAAAAACCCTTTGGCGCAACTGGTCTGCAAAGATCTGGTAATTA  
AGTCAGTTTAAATGTTAAGATATGGGTGTATGTATCTGATAAATTTGATGTAGTTAAGATTACAAGGCAGATTTTGG  
TCATGTCTCCAACCAGAGCCACGAAGGAATAAGCAACCTTGATACGCTTCAGCAGGATCTTGAGGAACAAATGAAAT  
CTAAGAAGTTCCTCATTGTCTTAGATGATGTGTGGGAAATCCGTACAGATGACTGGAAAAACTACTGGCTCCTTTA  
AGACCTAATGATCAGGTGAATTCGTACAGGAAGAGGCAACAGGTAATATGATAATTTTGACAACCTCGTATACAGAG  
TATTGCCAAAAGTCTTGGAACAGTACAATCAATTAAGTTAGAAGCTCTGAAAGATGACGATATATGGTCACTATTTA  
AAGTGCATGCTTTTGGTAATGATAAACATGATAGTAGTCCAGGCTTACAGGTTCTTGGGAAGCAAATTCGTAGCGAG  
CTAAAAGGCAACCCTGAGCAGCAAAAACCTGTGGGTTCACTATTAGGAACGAATCTTACCATCGATCATTGGGATAG  
CATTATAAAGAGTGAAGAATGGAAATCCCTGCAACAAGCTTATGGCATCATGCAAGCGCTGAAGTTGAGTCTGATC  
ATCTATCCAACCCTTACAGCAATGCGTCTCTTATTGTTCTCTTTTCCCAAGGGTTATTCTTTTCCAGCAAAAGCACA  
CTAATACAAATATGGATTGCTCAAGGATTTGTGGAAGAATCCAGTGAGAAGTTGGAGCAGAAAGGATGGAAATATCT  
AGCTGAGTTGGTAAATTCGGGTTTTCTTCCAGCAAGTTGAAAGCACACGGTTTTTCATCAGAATATTTTGTATGCACG  
ATCTTATGCATGATTTAGCGCAAAAGGTTTTCAAAACAGAATATGCAACTATAGATGGCTCAGAGTGCACAGAGTTA  
GCCCAAGTATACGCCATTTGTCAATAGTAACTGATTCTGCATACCGCAAGGAGAAATATAGAAACATATCTCGTAA  
TGAGGTGTTTGGAAAAGGTTGATGAAAGTTAAGTCAAGGAGTAAGTTGAGGTCACTGGTATTAATTTGGGCAATATG  
ATTCTCATTTTTTTAAATATTTCAAAGATGCTTTCAAGGAAGCACAACATCTGCGACTGCTGCAGATCACTGCAACT  
TATGCTGATTCTGATTCAATTTCTCTCCAGTTTGGTAAATCTACACATCTCCGGTATCTGAAAATTGTGACCGAAGA  
ATCCGGCAGAACTTTGCCCGATCTCTAAGGAAGTATTACCATCTTCAAGTACTAGATATTGGCTATAGATTTGGAA  
TTCCCGTATATCTAATGATATAAATAATCTTCTCAGCCTGCGGCATCTTGTTCATATGATGAAGTGTGTTCTTCC  
ATTGCTAACATTGGTAAAATGACCTCACTTCCAGGAAGTGGCAATTTTATTGTTTCCAGAAATTTAAGTGGTTTTGA  
GGTGACACAATTGAAATCCATGAACAAGCTTGTACAACCTTAGTGTGTCTCAGCTTGAAAATGTTAGAACTCAGGAGG  
AGGCATGTGGGGCAAACTGAAAGACAAACAACACTTAGAAAAGCTACATTTGTCTGGAAGGATGCATGGAATGGA  
TATGACAGTGACGAAAGCTATGAAGATGAATACGGCAGTGATATGAATATAGAAACAGAAGGGGAGGAACTGTCAGT  
TGGTGTATGCCAATGGTGGCCAAAGCTTACAACATCACAGTAATATAAGCTCTGAACTTGCTTCAAGTGAAGTGTCTG  
AAGGTCTTGAACCACATCACGGCCTCAAGTATCTACGGATATCTGGGTATAATGGATCTACCTCCCCAACTTGGCTT  
CCTTCTTCACTTACCTGTCTGCAAACTTCACTTAGAAAAATGTGGAAAATGGCAAATACTTCTTTAGAAAAGGCT  
AGGGTTACTTGTAAAGCTCGTGTGATCAAAATGAGGAATGCAACAGAACTCTCAATCCCTTCACTGGAGGAGCTTG  
TGTTAATTGCATTGCCAAGCTTGAACACATGCTCCTGCACTTCCATCAGGAACCTTGAACCTCCAGTTTAAAGGTTCTG  
AAAATTAAGAATTGCCCTGACTGAAGGTATTTCCCTTGTGTTGAGATTTCCAGAAAATTTGAAATCGAGCGGACGTC  
GTCATGGTTGCCCATCTTAGCAAGCTTACCATCTATAATTATCCTCTTTCTGTGTGCACAGTTCTCTGCCACCTT  
CCGCAATCAGTGGTTATGGAGAATATGGAAGGTGTACCCTTCCGCAATCACTTGAGGAACTTTACATCCATGAGTAT  
TCTCAAGAACTCTGCAGCCCTGCTTTTCCAGGAACTCACTCTCTGAGAAAATTACATGTACTGGGAACTCAAA  
TTTGTGTCTCTGCAGCTCCATTCTGCACAGCACTCGAAGAGTTGATAATTCAAAGCTGTGAGTCTCTTAGTTCTC  
TGGATGGCTTGAATTGCTTGGCAATCTCAGGTTGCTGCAGGCACATAGATGCCTCAGTGGTCATGGAGAAGATGGA  
AGGTGTATCCTTCCGCAATCACTTGGAGAACTTTACATCCATGAGTATTCTCAAGAACTCTGCAGCCCTGCTTTTC  
AGGGAACCCCACTCTCCTGAGAAAATTACATGTACTGGGAACTCAAATTTAGTGTCTCTGCAGCTCCATTCTGCA  
CAGCACTCGAAGAGTTGATAATTCAAAGCTGTGAGTCTCTTAGTTCTCTGGATGGCTTGAATTGCTTGGCAATCTC



AGGTTGCTGCAGGCACATAGATGCCTCAGTGGTCATGGAGAAGATGGAAGGTGTATCCTTCCGCAATCACTTGAGGA  
ACTTTACATCCATGAGTATTCTCAAGAACTCTGCAGCCCTGCTTTTCAGGGAACCTCACTCTCCTGAGAAAATTAC  
ATGTACTGGGAACTCAAATTTAGTGTCTCTGCAGCTCCATTCTGCACAGCACTCGAAGAGTTGATAATTCAAAGC  
TGTGAGTCTCTTAGTTCTCTGGATGGCTTGCAATTGCTTGGAATCTCAGGTTGCTGCAGGCACATAGATGCCTCAG  
TGGTCATGGAGAAGATGGAAGGTGTATCCTTCCGCAATCACTTGAGGAACCTTTACATCCATGAGTATTCTCAAGAAA  
CTCTGCAGCCCTGCTTTTCAGGGAACCTCACTCTCCTGAGAAAATTACATGTACTGGGAACTCAAATTTAGTGTCT  
CTGCAGCTCTATTCTGCACAGCACTCGAAGAGTTGATAATTCAAAGCTGTGAGTCTCTTAGTTCTCTGGATGGCTT  
GCAATTGCTTGGCAATCTCAGGTTGCTGCAGGCACATAGATGCCTCAGTGGTCATGGAGAAGATGGAAGGTGTATCC  
TTCCGCAATCACTTGAGGAACCTTTACATCCATGAGTATTCTCAAGAACTCTGCAGCCCTGCTTTTCAGGGAACCTC  
ACTCTCTGAGAAAATTACATGTACTGGGAACTCAAATTTAGTGTCTCTGCAGCTCCATTCTGCACAGCACTCGA  
AGTGTGATAATTCAAAGCTGTGAGTCTCTTAGTTCTCTGGATGGCTTGCAATTGCTTGGCAACCTCAGGTTGCTGC  
AGGCACATAGATGCCTCAGTGGTCATGGAGAAGATGGAAGGTGTATCCTTCCGCAATCACTTGAGGAACCTTTACATC  
CATGAGTATTCTCAAGAACTCTGCAGCCCTGCTTTTCAGGGAACCTCACTCTCCTGAGAAAATTACATGTACTGGG  
AAACTCAAATTTAGTGTCTCTGCAGCTCCATTCTGCACAGCACTCGAAGTGTGATAATTCAAAGCTGTGAGTCTC  
TTAGTTCTCTGGATGGCTTGCAATTGCTTGGCAATCTCAGGTTGCTGCCGGCACATAGATGCCTCAGTGGTCATGGA  
GAAGATGGAAGGTGTATCCTTCCGCAATCACTTGAGGAACCTTTTCATCAGTGTGAGTATTCTCTAGAAACTCTGCAGCC  
CTGCTTCTGACGAATCTCACCTGCTTAAAACAATTAAGGGTATCAGGCACCACAAGTTTCAAATCTCTAGAAGTGC  
AATCATGCACTGCACTCGAACATTTGAAGATTCAAGGTTGTGCGTCTGCTACATTGGAGGGGTTGCAATTCCTC  
CACGCCCTCAGGCATATGGAAGTATTAGATGCCTGGCTTGCTCCATATTTGGGGAGTTTCGTGAGAGCAGGGCTA  
TGAGCTATGCCCACGACTGGAAAGGCTCGACATCGATGACCCATCTATCCTTACCACGTCTGTTCTGTAAGCACCTCA  
CCTCCCTCCAACGCCTAGAGCTTAACTATTGCGGAAGTGAAGTGGCAAGACTAACGGATGAGCAAGAGAGAGCGCTT  
CAGCTCCTCACGTCCCTGCAAGAGCTCCGGTTAAGTATTGCTACAATCTCATAGATCTTCTGCGGGGCTCCACAG  
CCTTCCCTCCCTCGAGAGGTTGGAGATCCGGAGTTGCAGGAGCATCGCGAGGCTGCCGGAGAAGGGCCTCCCACCTT  
CGTTCGAAGAACTGGATATCATCGCTTGAGTAATGAGCTAGCTCAGCAGTGCAGAACTCTAGCAAGCACTCTGAAG  
GTCAAATTAATGGGGGATATGTGAAC TGAattactcggctggcttggtaggcgcacctttttccacctgcccaactgg  
cgtgggctcgttcaggcgttcaagctgctgtaaattccattgccgcaatgacgaccttcagaaccgttacacaatac  
aaaggacatatgatggctagatcaactgtcgcagagctagcttgggttcacctgaaaacataaggccaaacgcgctgg  
ttcttttaatacagaagtatcaaaaattgggttttgggttttaacgaaaagatgtagaaaattgggttttaatgtgccag  
attctgtaccagaattctgtattttggctccgtaattctgtgctacgactgatgttatttaactgatagcaatcga  
ccggcaaaaccaatccgctccaatgcattgtcacatacaaatctataattctatctactgaaaaggatgattgctg  
ttcattttcgtgattacagaaggaactgtgtatatacgtgctattttggcattccccattgggtccccagggttggctc  
ggatcagccaatttcgggtgggttaattcactttgtgtgctcctctgtgcaactcaagaattggttcgcacatgcaattca  
ggtgagcatcgcactacgcaagtttttttggtaacaaaggagtggttgacagcattgcagggttgctaaaaccgtgt  
caaaaatttgctaacaaaagaattctcttcagaaatagtatgaaaataaatgccacataagtaattctgagtaaaaaca  
gacagaatcactagagaagactaacgacaaaatcttctttttcaatttctgtggtgaaaaactcactaactccgcat  
ataatctcatgtatgcattggagggtgcataaccatttcgatcatgtatgcatttagctgaacattatcaagaagcaaa  
tttattgcacgggcaaacataagctaaactaattctcaagcaatttaataatcaaaaacagctctgcaataccaaga  
tatataaaaacttttggcagcatggagcaacaacaccgaaacactacaatcaagacagctcccagaaaagattatag  
ttgctacttcaattgccacagttacaatcaccataatgacacatcaaattacataagagattaaagagtatatgac  
agttgtaacaaaacaactgcattgagaactagaacagacagccacatgaacatattcacttcttcagatcagaaaag  
cctggtgaactaccagctaccaattgctaccgtagtctccatttttacttatatgtacataggacacctgcgcta  
tcagaatagccacaaagccagttcactcgtacaaaattaatcttgactaaatccaaacagataccaactcctcttaa  
tcaacttacaaaacacctacacttttgggtgtctctacaccaccaatcacacaaaaggaaattaatcatccaccaact  
cgtatcctactgttagaatggaggccttacaccagagaatgggcattgccagattctgagacactgtcctttgagct  
ccctga

>XA45(t)

MEEVEAGLLEGGIRWLAETILDNLNDADKLDDEWIRQIRLAADTEKLRAEIEKVDGVVAAVKGRAIGNRSLARSLRRLR  
GLLYDADDAVDELDFRLQQQVEGGVTRFEAEETVGDGAEDDDIPMDNTDVPEAVAAGSSKKRSKAWEHFTTVEF  
TADGKDSKARCKYCHKDLCCSTKNGTSALRNHLNVCKRKRVTSTDQPVNPSSAGEGASNATGNSVGRKMRMDGTST  
HHEAVSTHPWNKAELSNRIQCMTHQLEEAVNEVMRLCRSSSNQSRQGTTPPATNATTSSYLPEPIVYGRAEMETIK  
QLIMSNRSNGITVLPVIVGNGGIGKTTLAQLVCKDLVIKSQFNVKIWVYVSDKFDVVKITRQILDHVSNSQSHEGISNL  
DTLQQDLEEQMKSCKFLIVLDDVWEIRTDWKKLLAPLRPNQVNSQEEATGNMIILTTRIQSIAKSLGTVQS IKL  
EALKDDDIWSLKFVHAFGNDKHDSSPGLQVLGKQIASLKNPLAAKTVGSLLGTNLTIDHWDSI IKSEEWKSLQQA  
YGIMQALKLSYDHLNPLQCVSYCSLFPKGYSFSAQLIQIWIQAQGFVEESSEKLEQKGWKYLAELVNSGFLQQVE  
STRFSSEYFVMHDLMDHLAQLKVSQTEYATIDGSECTELAPSI RHLSIVTDSAYRKEKYRNI SRNEVFEKRLMKVKS

SKLRSLVLIGQYDSHFFKYFKDAFKEAQLRLLQITATYADSDSFLSSLVNSTHLRYLKIIVTEESGRTLPRSLRKY  
 HLQVLDIGYRFGIPRISNDINLLSLRHLVAYDEVCSIANIGKMTSLQELGNFIVQNNLSGFVETQLKSMNKLQV  
 SVSQLENVRTQEEACGAKLKDKQHLEKLHLSWKDAWNGYDSDES YEDEYGS DMNIETE GEEL SVGDANGA QSLQH  
 NISSELASSEVLEGLEPHGLKYLRI SGYNGSTSP TWLPS SLTCLQTLHLEKCGKWQILPLERLGLLVKLVLIKMRN  
 ATELSIPSLEELVLIAPSLNNTCSCTSIRNLNSSLKVLKIKNCPVLKVFPLFEISQKFEIERTSSWLP HLSKLT IYN  
 YPLSCVHSSSLPPSA  
 ISGYGEYGRCTLPQSLEELYIHEYSQETLQPCFSGNLTLLRKLHVLGNSNLVSLQLHSCTALEELIIQSCESLSSLD  
 GLQLLGNLRLRLQAHR  
 LSGHGEDGRCILPQSLEELYIHEYSQETLQPCFSGNPTLLRKLHVLGNSNLVSLQLHSCTALEELIIQSCESLSSLD  
 GLQLLGNLRLRLQAHR  
 LSGHGEDGRCILPQSLEELYIHEYSQETLQPCFSGNLTLLRKLHVLGNSNLVSLQLHSCTALEELIIQSCESLSSLD  
 GLQLLGNLRLRLQAHR  
 LSGHGEDGRCILPQSLEELYIHEYSQETLQPCFSGNLTLLRKLHVLGNSNLVSLQLYSCTALEELIIQSCESLSSLD  
 GLQLLGNLRLRLQAHR  
 LSGHGEDGRCILPQSLEELYIHEYSQETLQPCFSGNLTLLRKLHVLGNSNLVSLQLHSCTALEELIIQSCESLSSLD  
 GLQLLGNLRLRLQAHR  
 LSGHGEDGRCILPQSLEELYIHEYSQETLQPCFSGNLTLLRKLHVLGNSNLVSLQLHSCTALEELIIQSCESLSSLD  
 GLQLLGNLRLRLPAHR  
 LSGHGEDGRCILPQSLEELFISEYSLETLPFCFLTNLTCLKQLRVSGTTSFKSLELQSCCTALEHLKIQGCASLATLE  
 GLQFLHALRHMEVFR  
 PGLPPYLGSSSEQGYELCPRLERLDIDDPSILTTSFCKHLTSLQRLELNYCGSEVARLTDEQERALQLLTSLQELRF  
 KYCYNLIDLPAGLHSLPSLERLEIRSCRSIARLPEKGLPPSFEELDIACSNELAQQCRTLASTLKVKINGGYVN

**Supplemental Table 1. List of PCR primers used and their applications**

| Primer    | Sequence (5' to 3')                           | Usage                                                                                                                                                                                         |
|-----------|-----------------------------------------------|-----------------------------------------------------------------------------------------------------------------------------------------------------------------------------------------------|
| 53120-F4b | AGCTATGACATGATTACGAATT<br>CAGGAAGACGGGACTGA   | Amplification of genomic regions (promoter, coding, terminator sequences) of <i>Xal</i> allelic members                                                                                       |
| 53120-R4b | AACGACGGCCAGTGCCAAGCT<br>TCAGGGAGCTCAAAGGACAG |                                                                                                                                                                                               |
| 53120-F6b | AGCTATGACATGATTACGAATT<br>CCTCGAGGGTATAGACCAT | Along with primer 53120-R4b to amplify genomic regions of <i>CGS-Xo1<sub>11</sub></i>                                                                                                         |
| BB2-F1    | TGCCACAGTTACAATCACCCA                         | Along with primer M13F to genotype transgenic plants of <i>Xal</i> allelic genes                                                                                                              |
| XaL-F1    | ATCAGGAACTTGA ACTCCAG                         | To screen <i>Xal</i> alleles in a collection of rice accessions                                                                                                                               |
| XaL-R1    | AACCACTGATTGCGGAAGG                           |                                                                                                                                                                                               |
| XaL-F2    | CCTTCGCAATCAGTGGTT                            | To amplify the LRR region of <i>Xal</i> alleles                                                                                                                                               |
| XaL-R2    | AATGTAGCAAGCGACGCACA                          |                                                                                                                                                                                               |
| Xa14L-R1  | AGGGAATCAACATAGTTAATC                         | Along with primer XaL-F1 to screen <i>Xa14</i> in a collection of rice accessions                                                                                                             |
| Cambia-F  | TGAGCGGATAACAATTCACACAG                       | Sequence the whole genomic regions of <i>Xal</i> allelic <i>R</i> genes ( <i>Xa2</i> , <i>Xa14</i> , <i>Xa31(t)</i> , <i>CGS-Xo1<sub>11</sub></i> and <i>Xa45(t)</i> ) cloned in pCAMBIA1300. |
| BB2-F2b   | ACACCCTTGTCCTCCTGCT                           |                                                                                                                                                                                               |
| Xa1-F2    | CCCTCTGCACACGCCATTGG                          |                                                                                                                                                                                               |
| Xa1upT-F  | CGTGTAACAAGTACTGACCA                          |                                                                                                                                                                                               |
| Xa14-F4   | GAGGCTATGTGCATCCTCA                           |                                                                                                                                                                                               |
| gXa1BE-R4 | CATTGTCTTAGATGATGTGT                          |                                                                                                                                                                                               |
| Xa1C-F    | TCCAGTGAGAAGTTGGAGCA                          |                                                                                                                                                                                               |
| Xa14-R4   | TGTGCACACAGGAAAGAGGA                          |                                                                                                                                                                                               |
| Xa1L-F    | TCAGGAACTTGA ACTCCAG                          |                                                                                                                                                                                               |

|           |                                                      |                                                                                                        |
|-----------|------------------------------------------------------|--------------------------------------------------------------------------------------------------------|
| Xa1L-R4   | TCGAGTGCAGTGCATGATTG                                 |                                                                                                        |
| Xa37d-R1  | ACGGTTCTGAAGGTCGTCAT                                 |                                                                                                        |
| BB2-R2    | GAAATTGGCTGATCCGAG                                   |                                                                                                        |
| M13F      | TGTAAAACGACGGCCAGT                                   |                                                                                                        |
| 86TalKDF1 | TTCGGGGAAAGTAGCACTTGA<br>G                           | Amplification of the upstream regions flanking sequences of <i>iTal3</i> and <i>iTal6</i> from PXO86   |
| 86TalKDR1 | AATATCCGGGTAGGCGCAATC<br>ACTCTACCGATGCGTGTCGTAA<br>G |                                                                                                        |
| 86TalKDF2 | AGCCTACACAATCGCTCAAGAC<br>GTACGTGAACGAACGCCTCTAC     | Amplification of the downstream regions flanking sequences of <i>iTal3</i> and <i>iTal6</i> from PXO86 |
| 86TalKDR2 | TGACCTGTTCCAGCAGAGCTTG                               |                                                                                                        |
| KD13-F    | ACGTCTTGAGCGATTGTGTAGG<br>CT                         | Amplification of kanamycin resistance gene                                                             |
| KD13-R    | AGTGATTGCGCCTACCCGGATA<br>TT                         |                                                                                                        |
| 86TAL3-F2 | CAGACGTAAACGGTCCT                                    | detection of the deletion of <i>iTal3</i> in PXO86 mutant                                              |
| 86TAL3-R2 | ACGCTGCCAGGTCGGCAACC                                 |                                                                                                        |
| 86TAL6-F2 | GCATTCAAGGAAGAGGAAA                                  | detection of the deletion of <i>iTal6</i> in PXO86 mutant                                              |
| 86TAL6-R2 | AGTGTCTACGGAACCCTG                                   |                                                                                                        |

### Supplemental Table 2. Prevalence of *Xa1* allelic *R* genes in 3k rice

In a separate Excel file.

### Supplemental Table 3. Prevalence of *Xa1* allelic *R* genes and disease reactions in 87 rice accessions.

| Rice line    | Source | Accession  | Presence of <i>Xa1</i> marker | Number of 93 aa | PXO99 <sup>A</sup> | $\Delta$ Tal3 | $\Delta$ Tal3 (piTal3a) | $\Delta$ Tal3 (piTal3b) |
|--------------|--------|------------|-------------------------------|-----------------|--------------------|---------------|-------------------------|-------------------------|
| Kitaake      |        |            | -                             |                 | S                  | S             | S                       | S                       |
| IRBB1        | IRGC   | 418736     | +                             | 6               | S                  | R             | S                       | S                       |
| IRBB2        | IRGC   |            | +                             | 5               | S                  | R             | S                       | S                       |
| Basmati      | NSGC   | Clor 12524 | +                             | 7               | S                  | R             |                         |                         |
| Chikanari 2  | NSGC   | Clor 12452 | -                             |                 |                    |               |                         |                         |
| Taichung 65  | NSGC   | PI 275428  | -                             |                 |                    |               |                         |                         |
| Toyohikari   | NSGC   | Clor 12449 | -                             |                 |                    |               |                         |                         |
| Nagate Eikou | NSGC   | Clor 12447 | -                             |                 |                    |               |                         |                         |
| Pi No. 1     | NSGC   | Clor 12445 | -                             |                 | S                  | S             | S                       | S                       |
| Somewake     | NSGC   | Clor 12423 | -                             |                 |                    |               |                         |                         |
| Shinriki 1   | NSGC   | Clor 12401 | -                             |                 |                    |               |                         |                         |
| Palman       | NSGC   | Clor 12219 | -                             |                 |                    |               |                         |                         |
| Safed        | NSGC   | Clor 12218 | -                             |                 |                    |               |                         |                         |
| Jhona        | NSGC   | Clor 12217 | -                             |                 |                    |               |                         |                         |
| Mushkan      | NSGC   | Clor 12216 | -                             |                 |                    |               |                         |                         |
| Ziri         | NSGC   | Clor 12214 | -                             |                 |                    |               |                         |                         |
| Kinai 388    | NSGC   | Clor 12199 | +                             | 6               | S                  | R             |                         |                         |
| Miyako       | NSGC   | Clor 12066 | +                             | 6               | S                  | R             |                         |                         |
| Upland       | NSGC   | Clor 12001 | +                             | 6               | S                  | R             | S                       | S                       |

|                        |      |             |   |   |   |   |   |   |
|------------------------|------|-------------|---|---|---|---|---|---|
| Kinai Early No.70      | NSGC | Clor 12197  | - |   |   |   |   |   |
| Aikoku Kinai           | NSGC | Clor 12196  | - |   |   |   |   |   |
| Vansi                  | NSGC | Clor 12222  | - |   |   |   |   |   |
| Ainaura                | NSGC | Clor 12252  | + | 6 | S | R |   |   |
| Mogamiuruti            | NSGC | Clor 12254  | + | 7 | S | R | S | S |
| Santaro                | NSGC | Clor 12285  | - |   |   |   |   |   |
| Guneki                 | NSGC | Clor 12274  | - |   |   |   |   |   |
| Schou Sung Sensho      | NSGC | Clor 12286  | - |   | S | S |   |   |
| Maratelli              | NSGC | Clor 12294  | - |   |   |   |   |   |
| Dosan 50               | NSGC | Clor 12398  | - |   |   |   |   |   |
| WC 5119                | NSGC | Clor 12399  | - |   | S | S |   |   |
| Norin 23               | NSGC | Clor 12400  | - |   |   |   |   |   |
| Shiokari               | USDA | GSOR 300031 | - |   |   |   |   |   |
| Murasaki Daikoku       | USDA | GSOR 310168 | - |   |   |   |   |   |
| P 79                   | USDA | GSOR 310380 | - |   |   |   |   |   |
| Toga                   | USDA | GSOR 310788 | + | 5 | S | R | S | S |
| Zhongyu No.6           | USDA | GSOR 311449 | - |   |   |   |   |   |
| Minghui 63             | USDA | GSOR 311461 | - |   |   |   |   |   |
| NERICA 1               | NSGC | WAB0007739  | + |   |   |   |   |   |
| NERICA 2               | NSGC | WAB0018053  | - |   |   |   |   |   |
| NERICA 3               | NSGC | WAB0037218  | - |   |   |   |   |   |
| NERICA 4               | NSGC | WAB001802   | - |   |   |   |   |   |
| NERICA 5               | NSGC | WAB0018042  | + | 5 | S | R |   |   |
| NERICA 6               | NSGC | WAB0018092  | - |   |   |   |   |   |
| NERICA 7               | NSGC | WAB0018095  | + | 6 | S | R | S | S |
| NERICA 8               | NSGC | WAB0019617  | - |   |   |   |   |   |
| NERICA 9               | NSGC | WAB0019618  | - |   |   |   |   |   |
| NERICA 10              | NSGC | WAB0019619  | - |   |   |   |   |   |
| NERICA 11              | NSGC | WAB0019620  | - |   |   |   |   |   |
| NERICA 12              | NSGC | WAB0019621  | + | 5 | S | R |   |   |
| NERICA 13              | NSGC | WAB0019622  | - |   |   |   |   |   |
| NERICA 14              | NSGC | WAB0019624  | + | 5 | S | R |   |   |
| NERICA 15              | NSGC | WAB0019623  | - |   |   |   |   |   |
| <i>O.glaberrima-1</i>  | IRGC | 100854      | - |   |   |   |   |   |
| <i>O.glaberrima-2</i>  | IRGC | 100983      | - |   |   |   |   |   |
| <i>O.glaberrima-3</i>  | IRGC | 102277      | - |   |   |   |   |   |
| <i>O.glaberrima-4</i>  | IRGC | 102500      | - |   |   |   |   |   |
| <i>O.glaberrima-5</i>  | IRGC | 103700      | - |   |   |   |   |   |
| <i>O.glaberrima-6</i>  | IRGC | 103445      | - |   |   |   |   |   |
| <i>O.glaberrima-7</i>  | IRGC | 104033      | - |   |   |   |   |   |
| <i>O.glaberrima-8</i>  | IRGC | 104200      | - |   |   |   |   |   |
| <i>O.glaberrima-9</i>  | NPGS | PI 369455   | + | 6 | S | R |   |   |
| <i>O.glaberrima-10</i> | NPGS | PI 450252   | - |   |   |   |   |   |
| <i>O.glaberrima-11</i> | NPGS | PI 450298   | + | 7 | S | R | S | S |
| <i>O.glaberrima-12</i> | NPGS | PI 450353   | - |   |   |   |   |   |
| <i>O.glaberrima-13</i> | NPGS | PI 450363   | - |   |   |   |   |   |

|                         |      |           |   |   |   |   |   |   |
|-------------------------|------|-----------|---|---|---|---|---|---|
| <i>O.glaberrima</i> -14 | NPGS | PI 450396 | - |   | S | S | S | S |
| <i>O.glaberrima</i> -15 | NPGS | PI 450438 | - |   |   |   |   |   |
| <i>O.nivara</i> -1      | IRGC | 102463    | + | 7 | S | R | S | S |
| <i>O.nivara</i> -2      | IRGC | 105722    | - |   |   |   |   |   |
| <i>O.nivara</i> -3      | IRGC | 105732    | - |   |   |   |   |   |
| <i>O.nivara</i> -4      | IRGC | 81825     | - |   |   |   |   |   |
| <i>O.barthii</i> -1     | IRGC | 100119    | - |   |   |   |   |   |
| <i>O.barthii</i> -2     | IRGC | 101248    | - |   |   |   |   |   |
| <i>O.barthii</i> -3     | IRGC | 106291    | - |   |   |   |   |   |
| <i>O.barthii</i> -4     | IRGC | 101937    | - |   |   |   |   |   |
| <i>O.officinalis</i> -1 | IRGC | 105081    | - |   |   |   |   |   |
| <i>O.officinalis</i> -2 | IRGC | 105080    | - |   |   |   |   |   |
| <i>O.officinalis</i> -3 | IRGC | 105223    | - |   |   |   |   |   |
| <i>O.officinalis</i> -4 | IRGC | 102386    | - |   |   |   |   |   |
| <i>O.officinalis</i> -5 | IRGC | 81972     | - |   |   |   |   |   |
| <i>O.officinalis</i> -6 | IRGC | 80730     | - |   |   |   |   |   |
| <i>O.minuta</i> -1      | IRGC | 101133    | - |   |   |   |   |   |
| <i>O.minuta</i> -2      | IRGC | 105132    | - |   |   |   |   |   |
| <i>O.minuta</i> -3      | IRGC | 105128    | - |   |   |   |   |   |
| <i>O.minuta</i> -4      | IRGC | 101097    | - |   |   |   |   |   |
| <i>O.rhizomatis</i> -1  | IRGC | 103421    | - |   |   |   |   |   |
| <i>O.rhizomatis</i> -2  | IRGC | 105949    | - |   |   |   |   |   |

**Supplemental Table 4. Bacterial strains used in this study**

| Strains or Plasmids                                          | Relevant characteristics                                                                                                         | Reference/Source       |
|--------------------------------------------------------------|----------------------------------------------------------------------------------------------------------------------------------|------------------------|
| <b>Strains</b>                                               |                                                                                                                                  |                        |
| <b><i>Escherichia coli</i></b>                               |                                                                                                                                  |                        |
| XL1-Blue                                                     | <i>recA1 endA1 gyrA96 thi-1 hsdR17 supE44 relA1 lac</i><br>[F' <i>proAB lacI<sup>n</sup> ZAM15 Tn10</i> (Tetr)]                  | Stratagene             |
| Trans1-T1                                                    | F- $\phi$ 80( <i>lacZ</i> ) $\Delta$ M15 $\Delta$ <i>lacX74</i> hsdR( $r_K^-$ , $m_K^+$ )<br>$\Delta$ <i>recA1398 endA1 tonA</i> | TransGen<br>Biothch    |
| <b><i>Agrobacterium tumefaciens</i></b>                      |                                                                                                                                  |                        |
| EHA105                                                       | C58 ( <i>rif<sup>R</sup></i> ) Ti pEHA105 (pTiBo542DT-DNA)<br>Succinamopine                                                      | (Hood et al.,<br>1993) |
| <b><i>Xanthomonas oryzae</i></b><br><b>pv. <i>oryzae</i></b> |                                                                                                                                  |                        |
| PXO99 <sup>A</sup>                                           | Philippine race 6                                                                                                                | This study             |
| $\Delta$ Tal3                                                | <i>iTal3a</i> and <i>iTal3b</i> knock-out mutant of PXO99 <sup>A</sup>                                                           | (Ji et al., 2016)      |
| PXO86                                                        | Philippine race 2                                                                                                                | This study             |
| PXO86 $\Delta$ iTal3                                         | iTALE A type gene knock-out mutant of PXO86                                                                                      | This study             |
| PXO86 $\Delta$ iTal6                                         | iTALE B type gene knock-out mutant of PXO86                                                                                      | This study             |
| PXO61                                                        | Philippine strain                                                                                                                | This study             |
| PXO79                                                        | Philippine strain                                                                                                                | This study             |
| PXO112                                                       | Philippine strain                                                                                                                | This study             |

|                 |                                                                               |            |
|-----------------|-------------------------------------------------------------------------------|------------|
| KXO85           | Korean strain                                                                 | This study |
| JW89011         | Korean strain                                                                 | This study |
| K202            | Korean strain                                                                 | This study |
| T7174           | Japanese strain                                                               | This study |
| H75373          | Japanese strain                                                               | This study |
| Xoo2            | Thai strain                                                                   | This study |
| A3842           | Indian strain                                                                 | This study |
| PbXO7           | Indian strain                                                                 | This study |
| IXO56           | Indonesian strain                                                             | This study |
| NXO 260         | Nepalese strain                                                               | This study |
| CIAT1185        | Colombian strain                                                              | This study |
| ZHE 173         | Chinese strain                                                                | This study |
| C1              | Chinese strain                                                                | This study |
| GD1358          | Chinese strain                                                                | This study |
| HB21            | Chinese strain                                                                | This study |
| Aust-2013       | Australian strain                                                             | This study |
| Aust-R3         | Australian strain                                                             | This study |
| AXO1947         | Cameroon strain                                                               | This study |
|                 |                                                                               |            |
|                 |                                                                               |            |
| <b>Plasmids</b> |                                                                               |            |
| pCAMBIA1300     | Binary T-DNA vector for rice transformation                                   | CAMBIA     |
| piTal3a         | pHM1 expressing <i>iTal3a</i> under <i>lacZ</i> promoter with FLAG in pZW     | This study |
| piTal3b         | pHM1 expressing <i>iTal3b</i> under <i>lacZ</i> promoter with FLAG tag in pZW | This study |
| piTal3aFb       | <i>iTal3a</i> variant containing <i>iTal3b</i> C-terminus in pHZW             | This study |
| piTal3bFa       | <i>iTal3b</i> variant containing <i>iTal3a</i> C-terminus in pHZW             | This study |

Hood, E.E., Gelvin, S.B., Melchers, L.S., and Hoekema, A. (1993). New *Agrobacterium* helper plasmids for gene transfer to plants. *Transgenic research* 2:208-218.

Ji, Z., Ji, C., Liu, B., Zou, L., Chen, G., and Yang, B. (2016). Interfering TAL effectors of *Xanthomonas oryzae* neutralize *R*-gene-mediated plant disease resistance. *Nature communications* 7:13435.

**Supplemental Table 5. Prevalence of iTALE genes in Xoo and Xoc genomes.**

In a separate Excel file.
